# Supplementary material for: Stereocontrolled access to δ-lactone-fused-γ-lactams bearing angular benzylic quaternary stereocenters
Source: Royal Society of Chemistry journal article supplement (doi:10.1039/d2ra02167f), 2022-01-01
Supplement: d2ra02167f1.pdf [file d2ra02167f1.pdf]

Supporting Information for:

*Stereocontrolled access to  $\delta$ -lactone-fused- $\gamma$ -lactams bearing angular benzylic quaternary stereocenters*

*Timothy K. Beng,\* Morgan J. Rodriguez, and Claire Borg*

*Department of Chemistry, Central Washington University,  
Ellensburg, WA 98926, USA*

[Timothy.beng@cwu.edu](mailto:Timothy.beng@cwu.edu)

*Contents:*

|                                                         |     |
|---------------------------------------------------------|-----|
| 1. General Experimental Information and Procedures..... | S2  |
| 2. Scheme 1 Results .....                               | S4  |
| 3. References .....                                     | S63 |

## 2. Experimental Section

All experiments involving air and moisture-sensitive reagents were carried out under an inert atmosphere of nitrogen and using freshly distilled solvents. Freshly purchased toluene and DMF were stored under 4 Å molecular sieves for several days prior to use. THF was distilled from sodium benzophenone ketyl. All amines and enals were newly purchased and used without further purification. Column chromatography was performed on silica gel (230-400 mesh). Thin-layer chromatography (TLC) was performed using Silicycle Siliaplate™ glass backed plates (250 µm thickness, 60 Å porosity, F-254 indicator) and visualized using UV (254 nm) or CAM, *p*-anisaldehyde, or KMnO<sub>4</sub> stain. All reported temperatures were internal to a reaction vessel. Unless otherwise indicated, <sup>1</sup>H, <sup>13</sup>C, and DEPT-135 spectra were acquired using CDCl<sub>3</sub> as solvent, at room temperature. Chemical shifts are quoted in parts per million (ppm). HRMS-EI<sup>+</sup> data were obtained using either electron spray ionization (ESI) or electron impact (EI) techniques. High-resolution ESI was obtained on an LTQ-FT (ion trap; analyzed using Excalibur). High resolution EI was obtained on an Autospec (magnetic sector; analyzed using MassLynx).

Brine solutions are saturated solutions of aqueous sodium chloride.

Phenylsuccinic anhydride was obtained from Fisher Scientific.

The 1,3-azadienes were prepared as previously reported by us.<sup>1</sup>

### General Procedure A: Synthesis and 6-*endo*-bromolactonization of lactam acid **3**<sup>2</sup>

A 10 mL screw-cap vial was flame-dried, evacuated and flushed with nitrogen. A solution of 1,3-azadiene **2** (1.0 mL, 0.10 M in freshly distilled 2-MeTHF) was added to the vial at room temperature followed by anhydride **1** (176.2 mg, 1 mmol, 1 equiv) and sodium sulfate (0.10 g). The contents were placed in a pre-heated oil bath thermostatted at the desired temperature (usually 23 – 40 °C). After complete conversion (as judged by TLC and NMR), the mixture/suspension was cooled to room temperature. It was then filtered to remove the sodium sulfate, while washing with THF. The solvents were removed *in vacuo* and the residue was washed several times with petroleum ether, affording the crude acid **3**. The lactam acid was then charged (in air) in an oven-dried 10 mL screw-cap vial equipped with a stir bar and DCM (5 mL) was added. Then, NBS (196 mg, 1.1 mmol, 1.1 equiv) and Ph<sub>3</sub>P=S (14.7 mg, 5 mol%) were added. The reaction mixture was stirred at room temperature until TLC and GC-MS showed full conversion. Then, the reaction mixture was diluted with DCM (20 mL) and quenched with 10% aqueous sodium sulfite (10 mL).

The layers were separated and the aqueous layer was extracted once with DCM. The combined organic extracts were washed with brine, dried over MgSO<sub>4</sub> and concentrated *in vacuo* to give the desired lactam-lactone, which was purified by flash chromatography on silica.

**General Procedure B: Synthesis and 6-endo-iodolactonization of lactam acid 3**

A 10 mL screw-cap vial was flame-dried, evacuated and flushed with nitrogen. A solution of 1,3-azadiene **2** (1.0 mL, 0.10 M in freshly distilled 2-MeTHF) was added to the vial at room temperature followed by anhydride **1** (176.2 mg, 1 mmol, 1 equiv) and sodium sulfate (0.10 g). The contents were placed in a pre-heated oil bath thermostatted at the desired temperature (usually 23 – 40 °C). After complete conversion (as judged by TLC and NMR), the mixture/suspension was cooled to room temperature. It was then filtered to remove the sodium sulfate, while washing with THF. The solvents were removed *in vacuo* and the residue was washed several times with petroleum ether, affording the crude acid **3**. The lactam acid was then charged (in air) in an oven-dried 10 mL screw-cap vial equipped with a stir bar and DCM (5 mL) was added. Then, NIS (247.5 mg, 1.1 mmol, 1.1 equiv) and Ph<sub>3</sub>P=S (14.7 mg, 5 mol%) were added at 0 °C. The reaction mixture was stirred at 0 °C until TLC and GC-MS showed full conversion. Then, the reaction mixture was diluted with DCM (20 mL) and quenched with 10% aqueous sodium sulfite (10 mL). The layers were separated and the aqueous layer was extracted once with DCM. The combined organic extracts were washed with brine, dried over MgSO<sub>4</sub> and concentrated *in vacuo* to give the desired lactam-lactone, which was purified by flash chromatography on silica.

## **Scheme 1 Results**

### **Compound 4a**

Prepared in 1 mmol scale using **General Procedure A**. Purification: Flash chromatography on silica eluting with hexane/EtOAc (80:20). Amorphous solid. Yield = 383.7 mg, 87%, 95:5 dr.

$^1\text{H}$  NMR (400 MHz,  $\text{CDCl}_3$ )  $\delta$  7.20 – 6.98 (m, 10H), 6.23 (d,  $J = 1.9$  Hz, 1H), 4.90 (s, 1H), 3.60 (d,  $J = 16.4$  Hz, 1H), 3.21 (d,  $J = 16.4$  Hz, 1H), 1.60 (s, 9H).  $^{13}\text{C}$  NMR (101 MHz,  $\text{CDCl}_3$ )  $\delta$  172.1, 167.5, 138.2, 134.8, 128.4, 128.1, 127.9, 127.7, 127.5, 89.5, 67.3, 66.2, 59.8, 52.7, 39.3, 28.2. FTIR (KBr): 2976.1, 2927.2, 1721.8, 1650.2, 1492.0, 1438.5, 1362.3, 1320.5, 1290.1, 1206.3, 1180.3, 1146.7, 1132.4, 995.8, 918.9, 700.1. HRMS calc for  $\text{C}_{23}\text{H}_{24}\text{BrNO}_3$  441.0940, found 441.0946.

File : C:\GCMS\Beng Research\Data\TKB-13-144C-CRUDE.D  
 Operator : Beng  
 Acquired : 8 Sep 2021 19:36 using AcqMethod 180-280C-20190419.M  
 Instrument : Instrument #1  
 Sample Name :  
 Misc Info :  
 Vial Number: 1

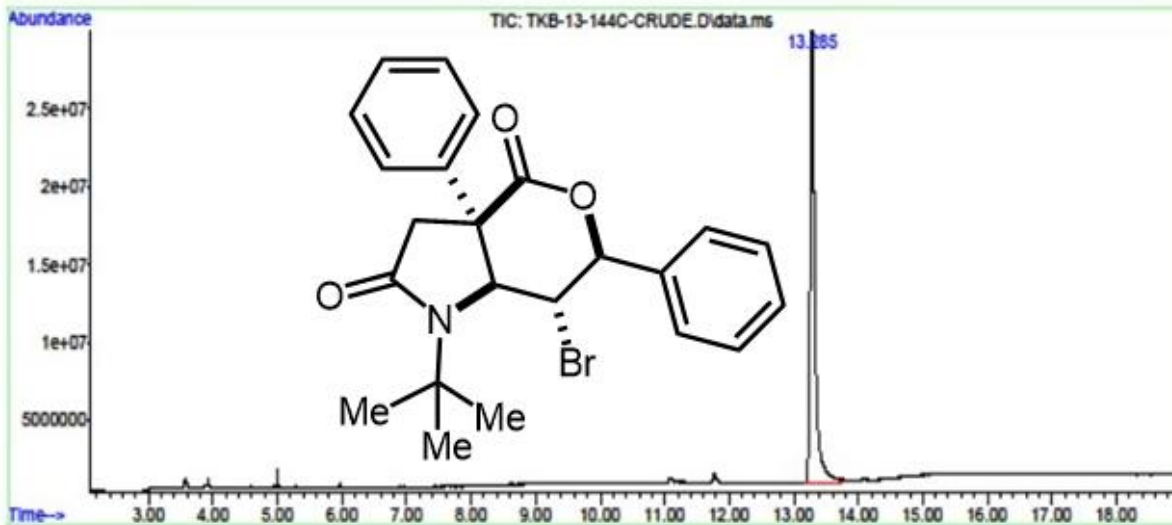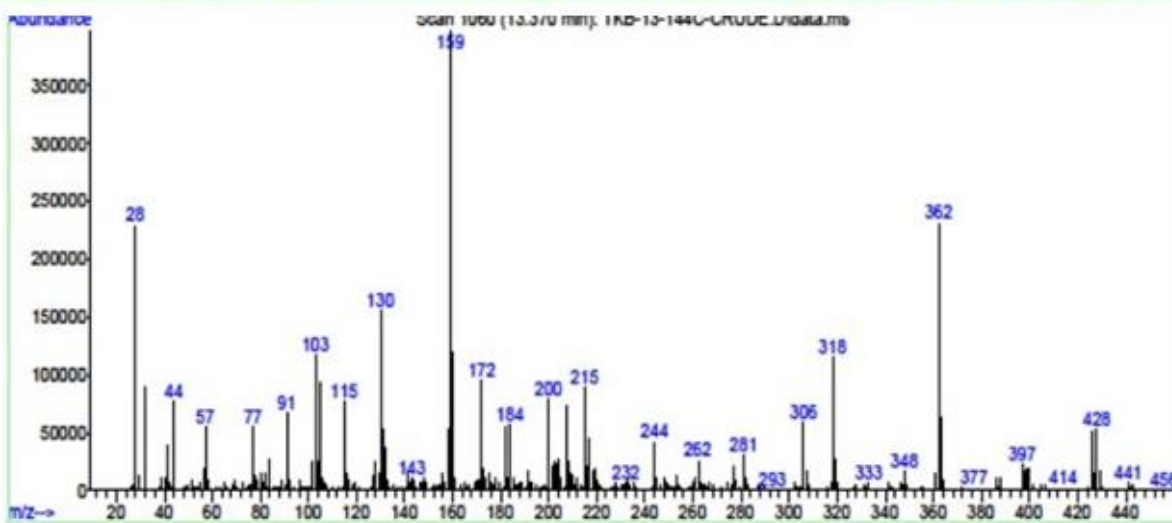

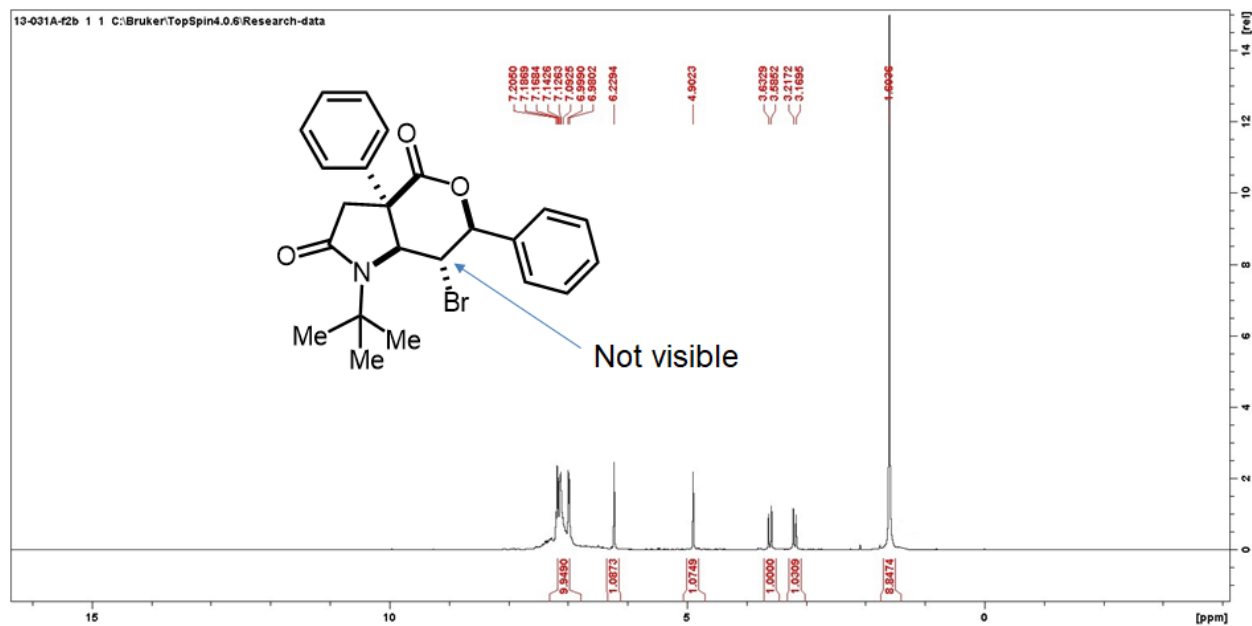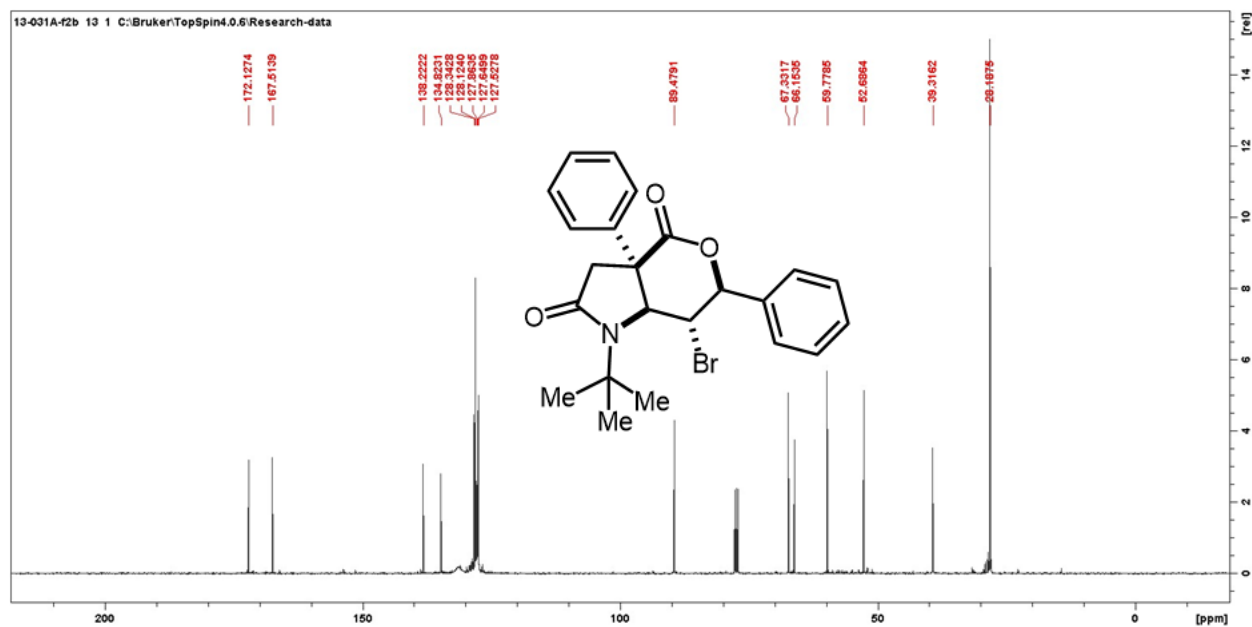

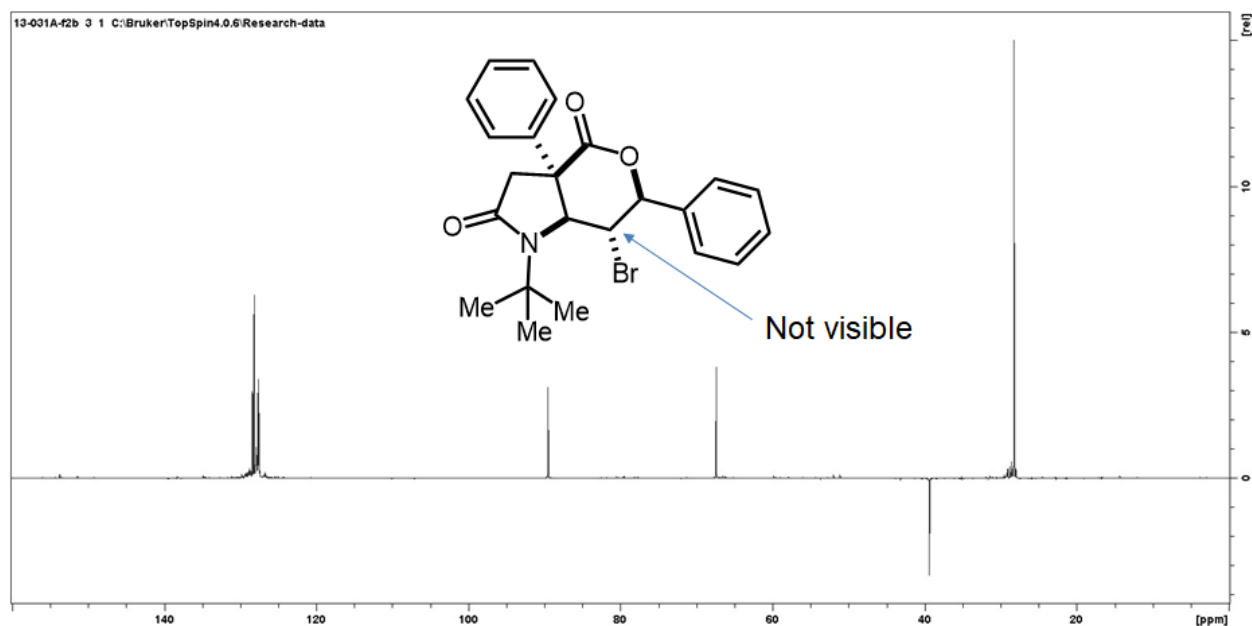

### Compound 4b

Prepared in 1 mmol scale using **General Procedure A**. Purification: Flash chromatography on silica eluting with hexane/EtOAc (60:40). Amorphous solid. Yield = 387.1 mg, 82%, 95:5 dr.  $^1\text{H}$  NMR (400 MHz,  $\text{CDCl}_3$ )  $\delta$  7.44 – 7.26 (m, 7H), 6.95 (d,  $J = 6.7$  Hz, 2H), 5.51 (d,  $J = 9.7$  Hz, 1H), 4.42 (t,  $J = 9.6$  Hz, 1H), 4.36 (d,  $J = 9.5$  Hz, 1H), 3.84 (s, 3H), 3.22 (d,  $J = 17.7$  Hz, 1H), 3.12 (d,  $J = 17.7$  Hz, 1H), 1.29 (s, 9H).  $^{13}\text{C}$  NMR (101 MHz,  $\text{CDCl}_3$ )  $\delta$  171.9, 171.0, 160.6, 139.6, 129.1, 128.8, 128.6, 128.2, 126.6, 114.1, 82.6, 56.2, 55.4, 54.4, 52.2, 41.3, 28.0. FTIR (KBr): 2930.9, 1721.7, 1664.2, 1606.9, 1576.9, 1511.8, 1422.4, 1359.3, 1300.0, 1250.9, 1175.8, 1113.2, 1031.2, 996.3, 970.3, 923.7, 826.6, 764.9. HRMS calc for  $\text{C}_{24}\text{H}_{26}\text{BrNO}_4$  471.1045, found 471.1049.

File :C:\GCMS\Beng Research\Data\TKB-13-061A-F3NMR.D  
 Operator : Beng  
 Acquired : 18 Feb 2021 18:04 using AcqMethod 180-280C-20190419.M  
 Instrument : Instrument #1  
 Sample Name :  
 Misc Info :  
 Vial Number: 1

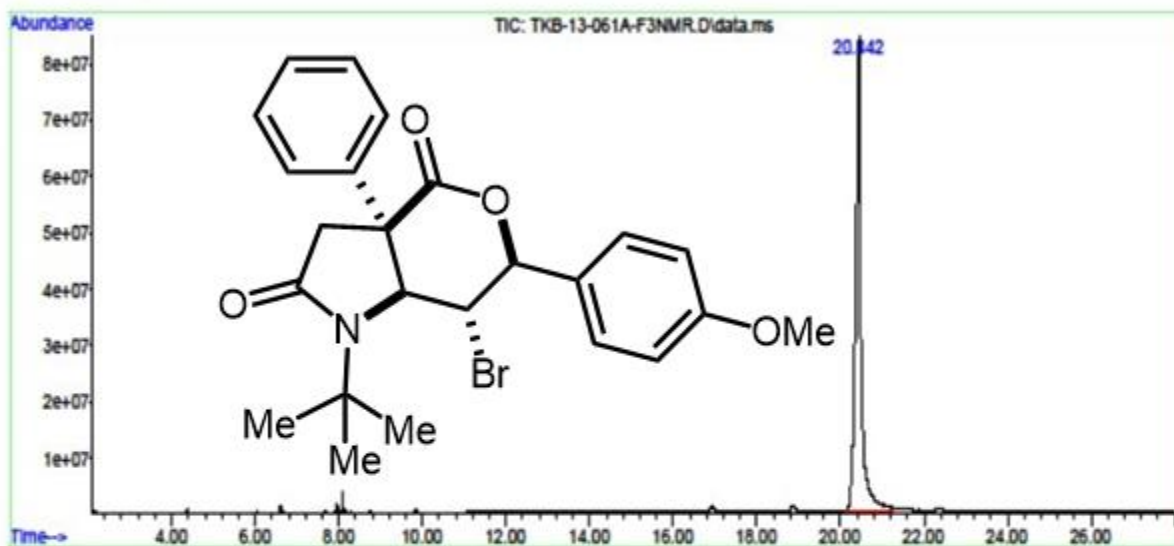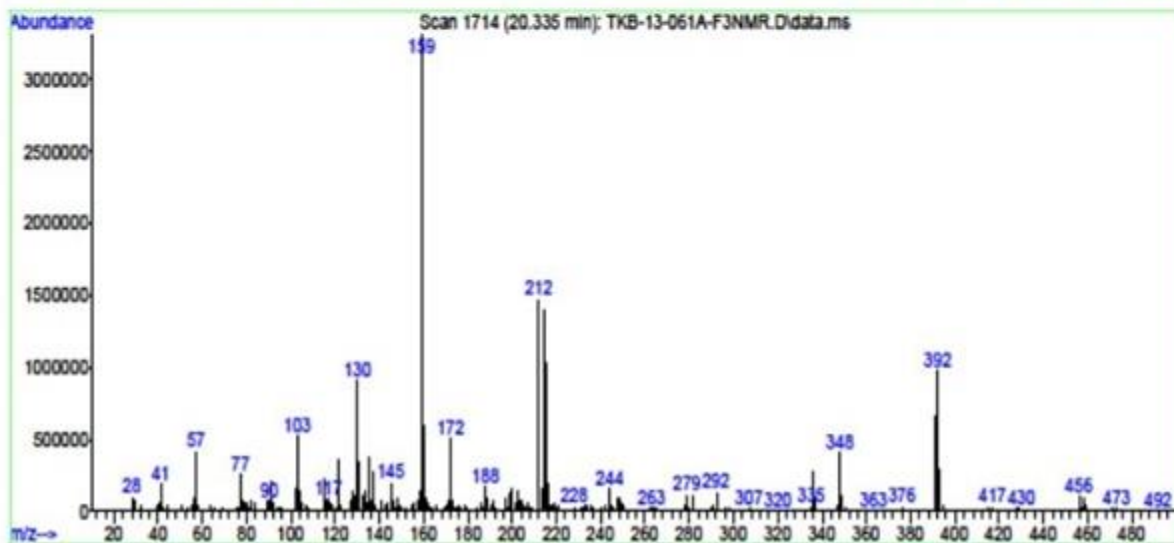



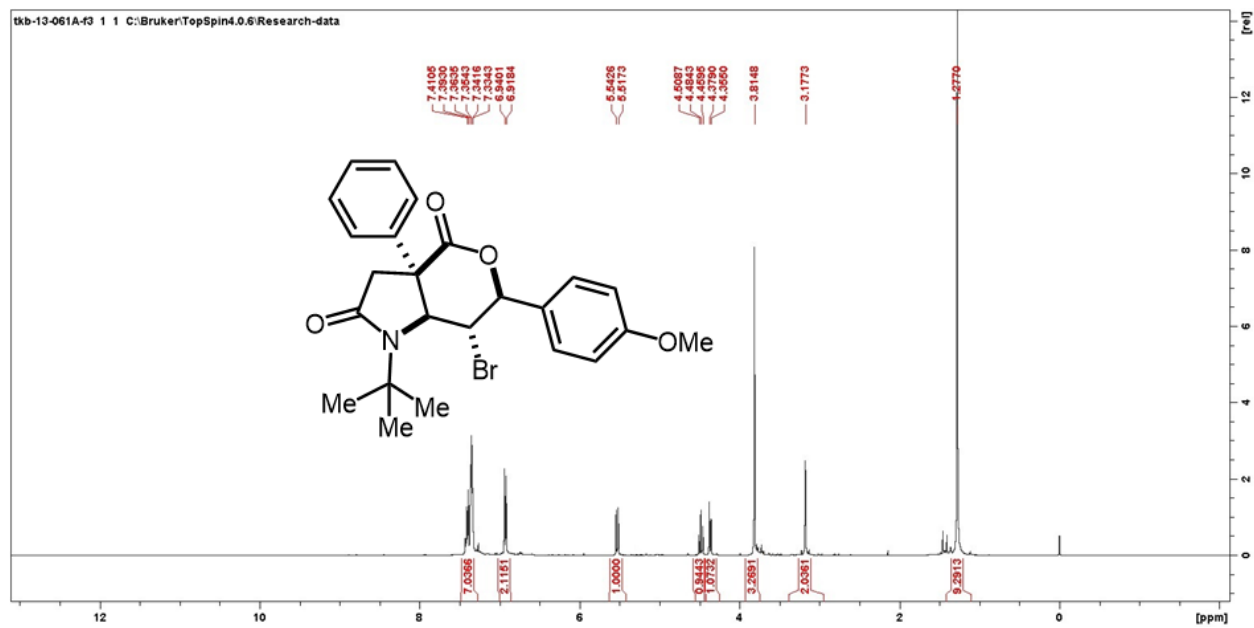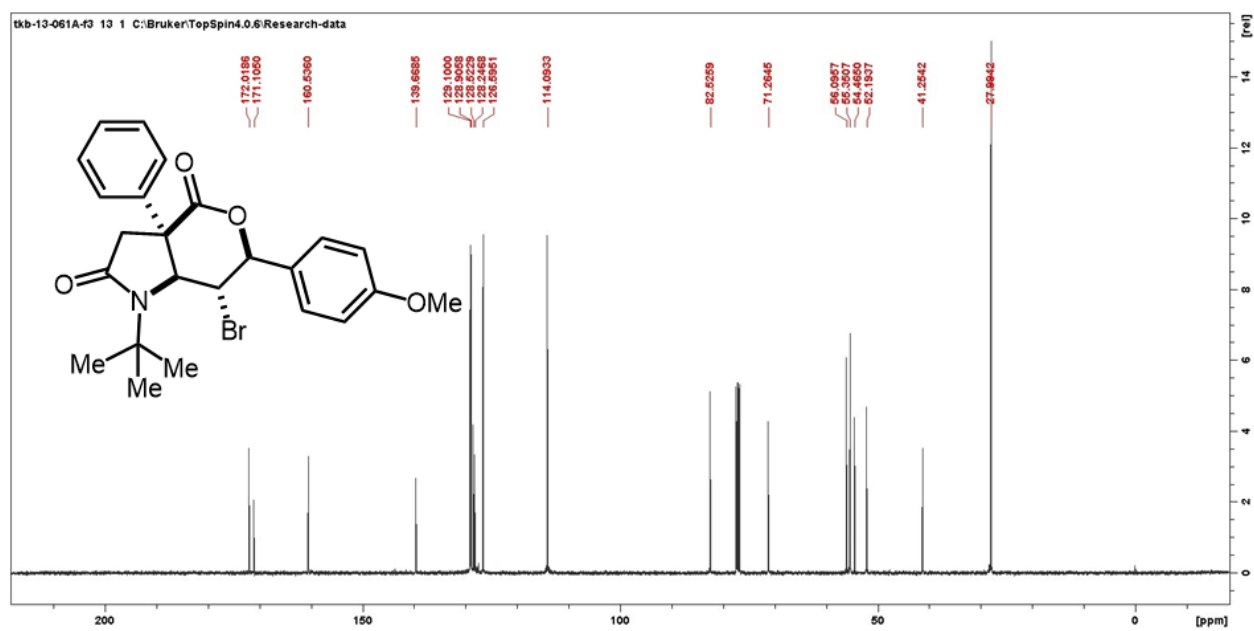

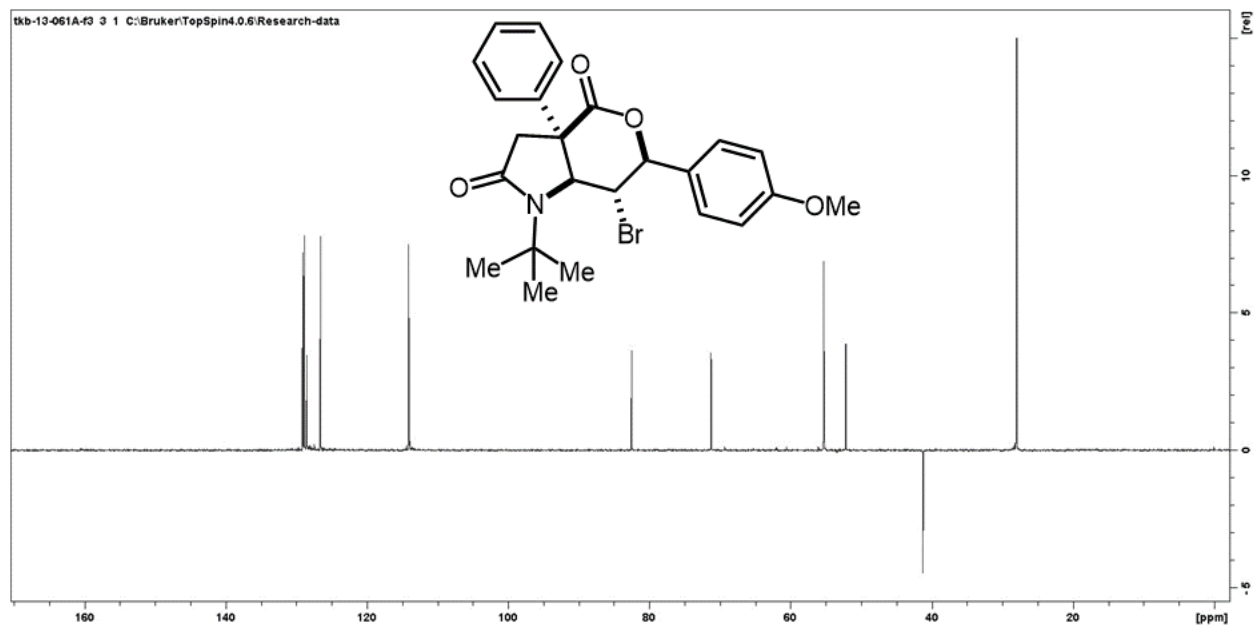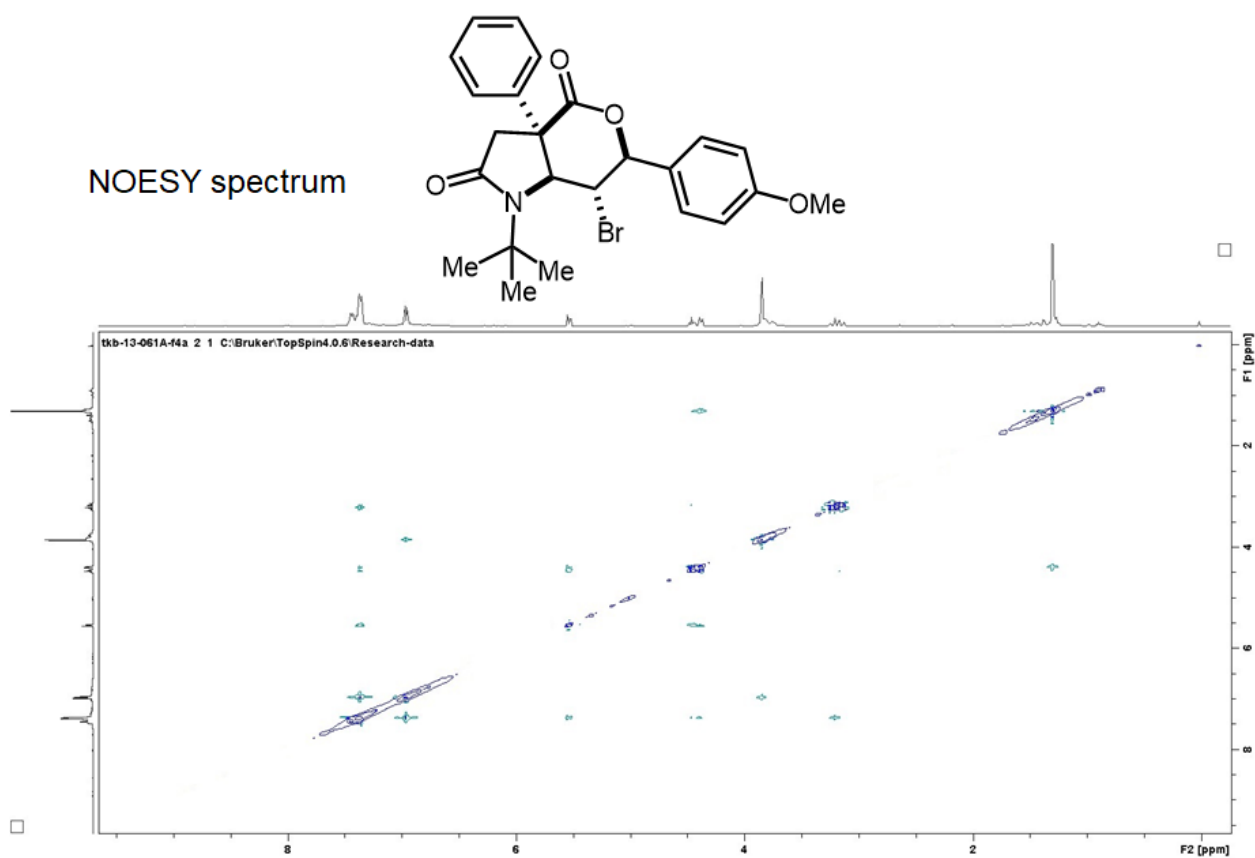

Compound 4c

Prepared in 1 mmol scale using **General Procedure A**. Purification: Flash chromatography on silica eluting with hexane/EtOAc (40:60). Amorphous solid. Yield = 443.2 mg, 91%, 95:5 dr.

$^1\text{H}$  NMR (400 MHz,  $\text{CDCl}_3$ )  $\delta$  8.06 (br s, 2H), 7.30 – 7.15 (m, 5H), 7.03 (d,  $J = 7.6$  Hz, 2H), 6.28 (s, 1H), 5.03 (s, 1H), 3.59 (d,  $J = 19.2$  Hz, 1H), 3.31 (d,  $J = 19.2$  Hz, 1H), 1.64 (s, 9H).  $^{13}\text{C}$  NMR (101 MHz,  $\text{CDCl}_3$ )  $\delta$  171.6, 166.8, 147.5, 141.7, 137.3, 128.5, 128.2, 127.3, 122.9, 89.3, 66.6, 64.2, 60.1, 52.4, 38.8, 28.1. FTIR (KBr): 2976.0, 1721.7, 1650.1, 1492.0, 1438.4, 1362.2, 1320.5, 1290.1, 1206.3, 1180.3, 1146.7, 1132.1, 995.8, 918.8, 700.1. HRMS calc for  $\text{C}_{23}\text{H}_{23}\text{BrN}_2\text{O}_5$  486.0790, found 486.0797.

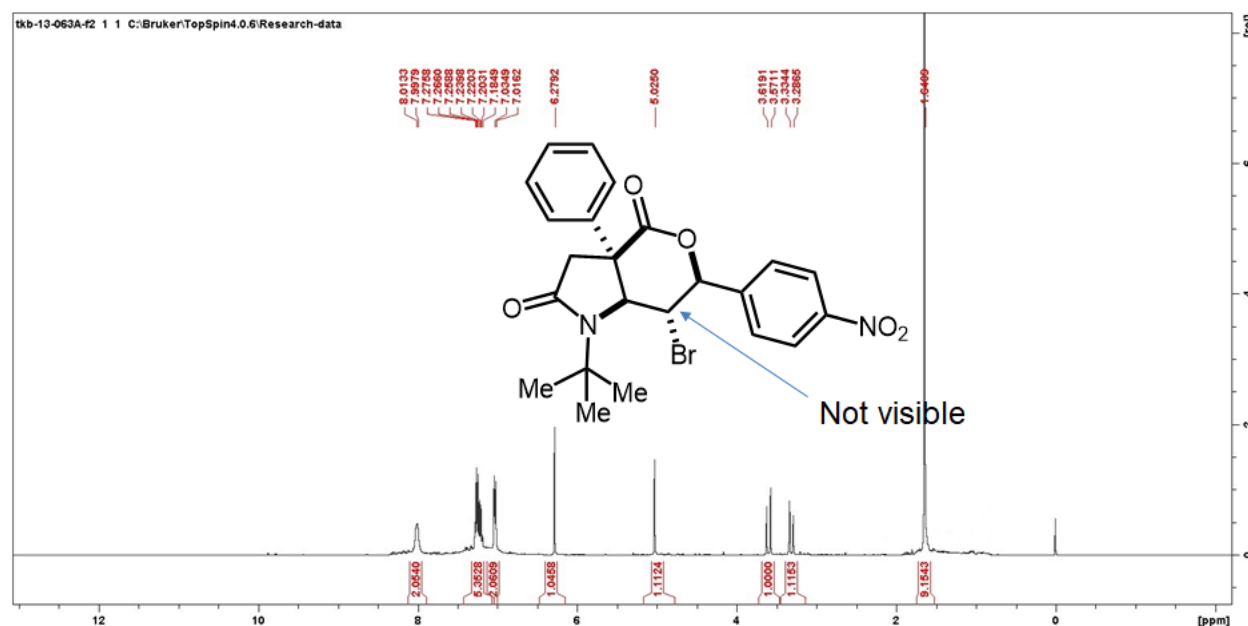

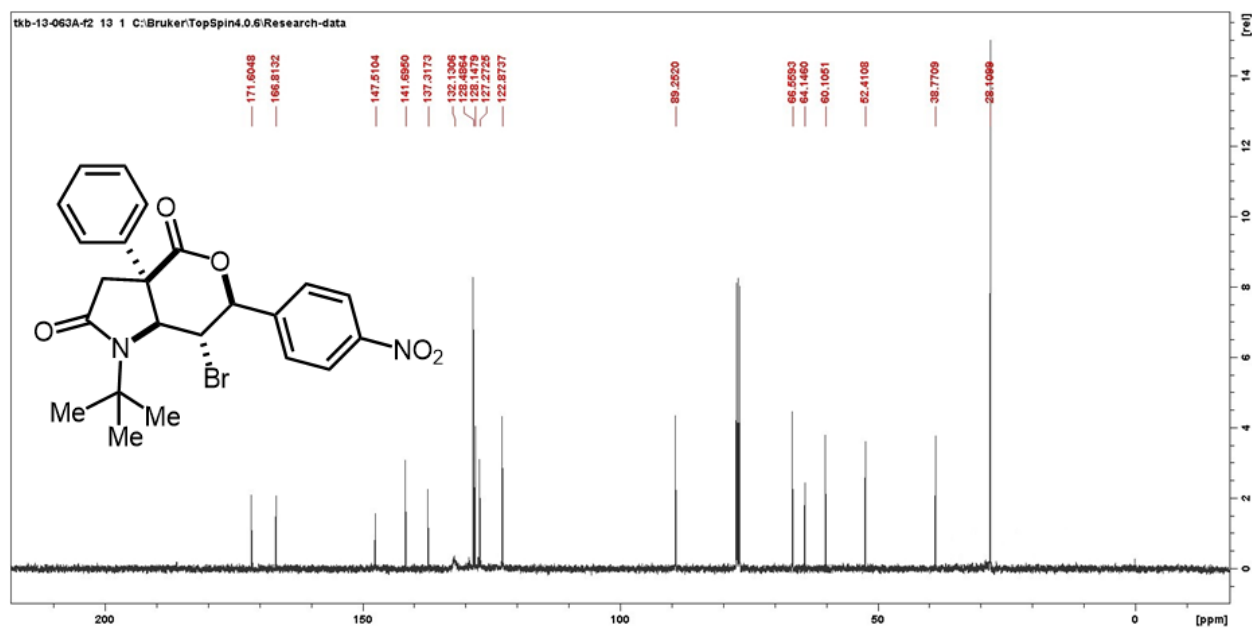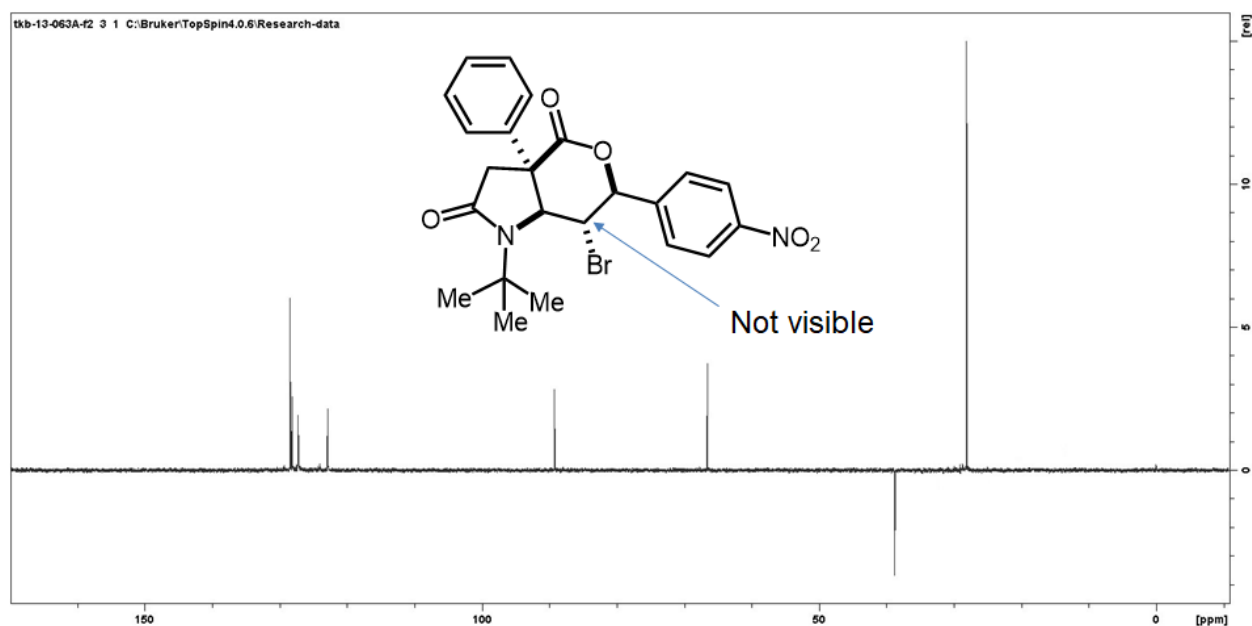

### Compound 4d

Prepared in 1 mmol scale using **General Procedure A**. Purification: Flash chromatography on silica eluting with hexane/EtOAc (80:20). Oily substance. Yield = 404.8 mg, 88%, 95:5 dr.  $^1\text{H}$  NMR (400 MHz,  $\text{CDCl}_3$ )  $\delta$  7.44 – 7.33 (m, 7H), 7.13 (t,  $J$  = 8.4 Hz, 2H), 5.53 (d,  $J$  = 9.3 Hz, 1H), 4.45 – 4.33 (m, 2H), 3.23 (d,  $J$  = 17.7 Hz, 1H), 3.15 (d,  $J$  = 17.7 Hz, 1H), 1.28 (s, 9H).  $^{13}\text{C}$  NMR (101 MHz,  $\text{CDCl}_3$ )  $\delta$  171.9, 170.8, 164.6, 162.1, 139.4, 132.1, 132.0, 129.6, 129.5, 129.2, 128.7,

126.6, 116.0, 115.7, 82.0, 71.2, 56.2, 54.6, 51.9, 41.3, 28.0. FTIR (KBr): 2932.4, 1721.5, 1666.3, 1606.9, 1511.0, 1448.5, 1414.7, 1384.9, 1357.4, 1298.7, 1247.5, 1179.3, 1135.9, 1031.8, 995.8, 831.0, 750.2, 694.7. HRMS calc for C<sub>23</sub>H<sub>23</sub>BrFNO<sub>3</sub> 459.0845, found 459.0840.

File :C:\GCMS\Beng Research\Data\TKB-13-064A-TUBE24.D  
 Operator : Beng  
 Acquired : 1 Mar 2021 18:43 using AcqMethod 180-280C-20190419.M  
 Instrument : Instrument #1  
 Sample Name :  
 Misc Info :  
 Vial Number: 1

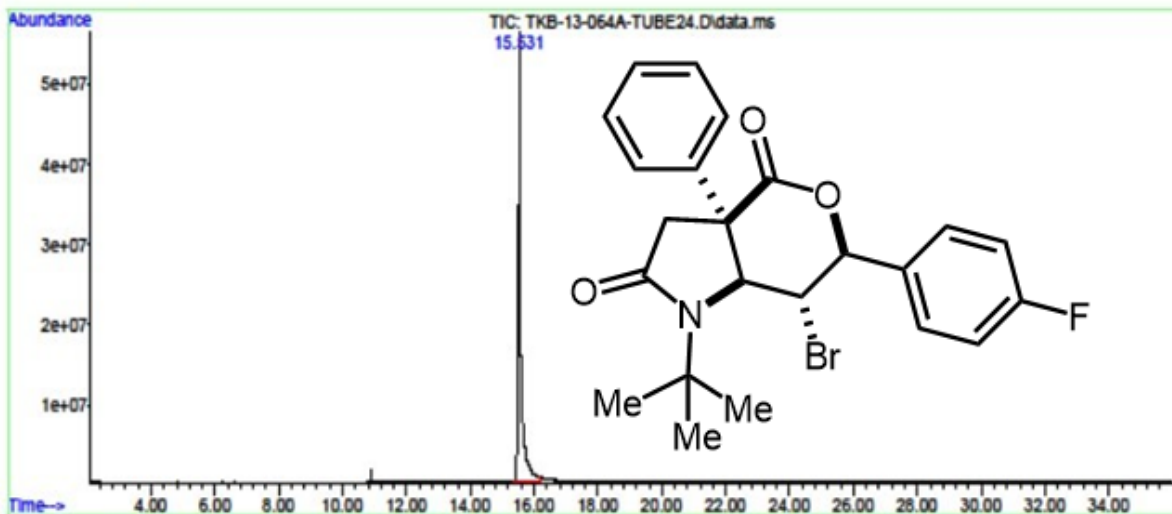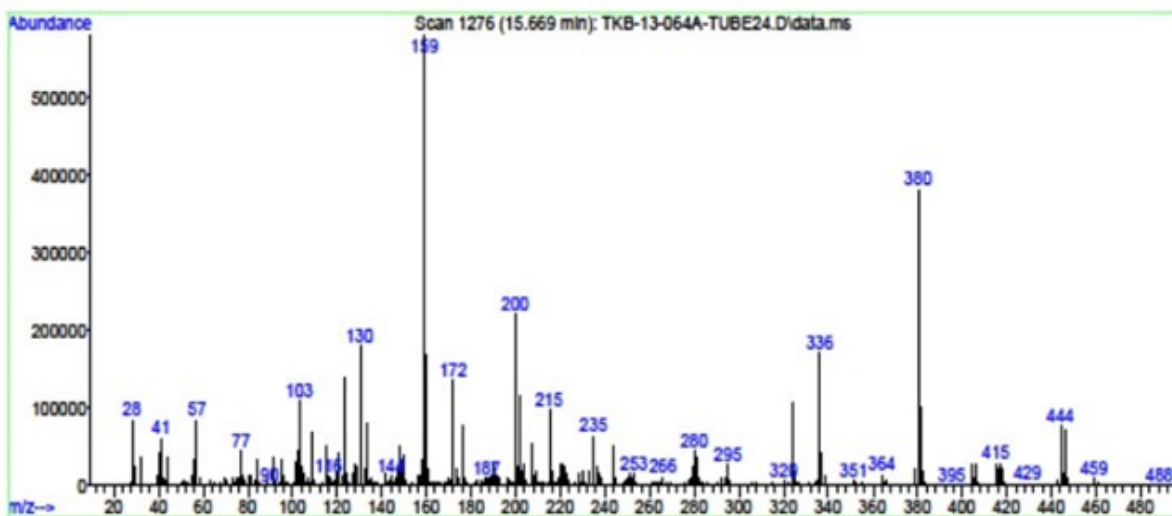

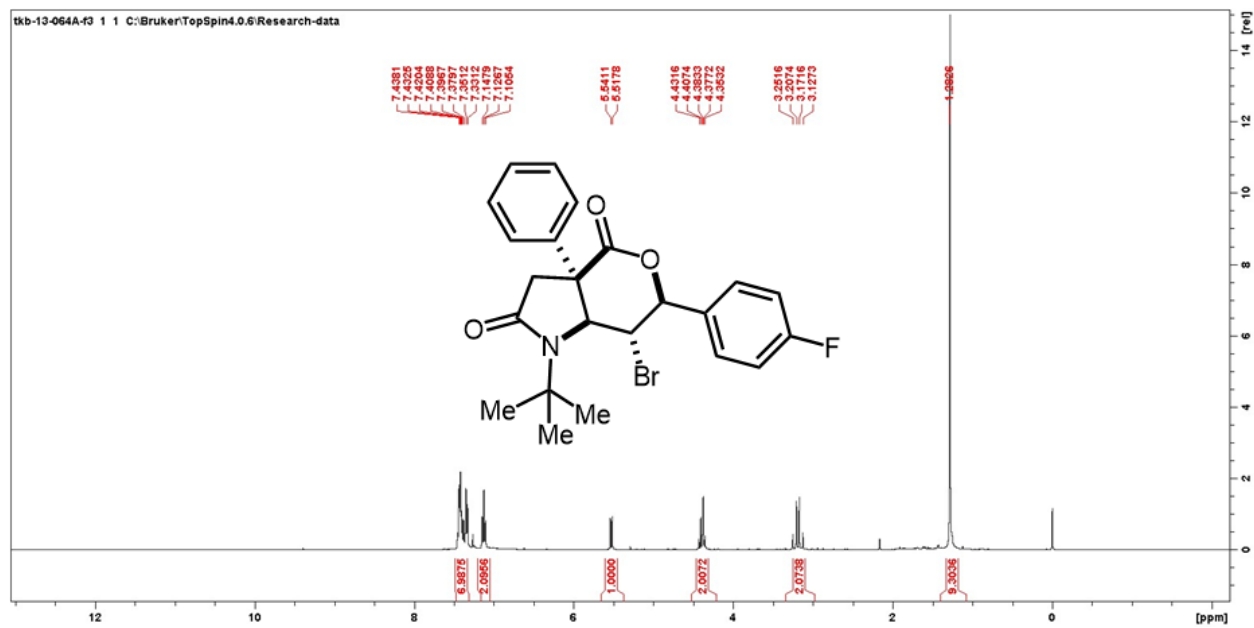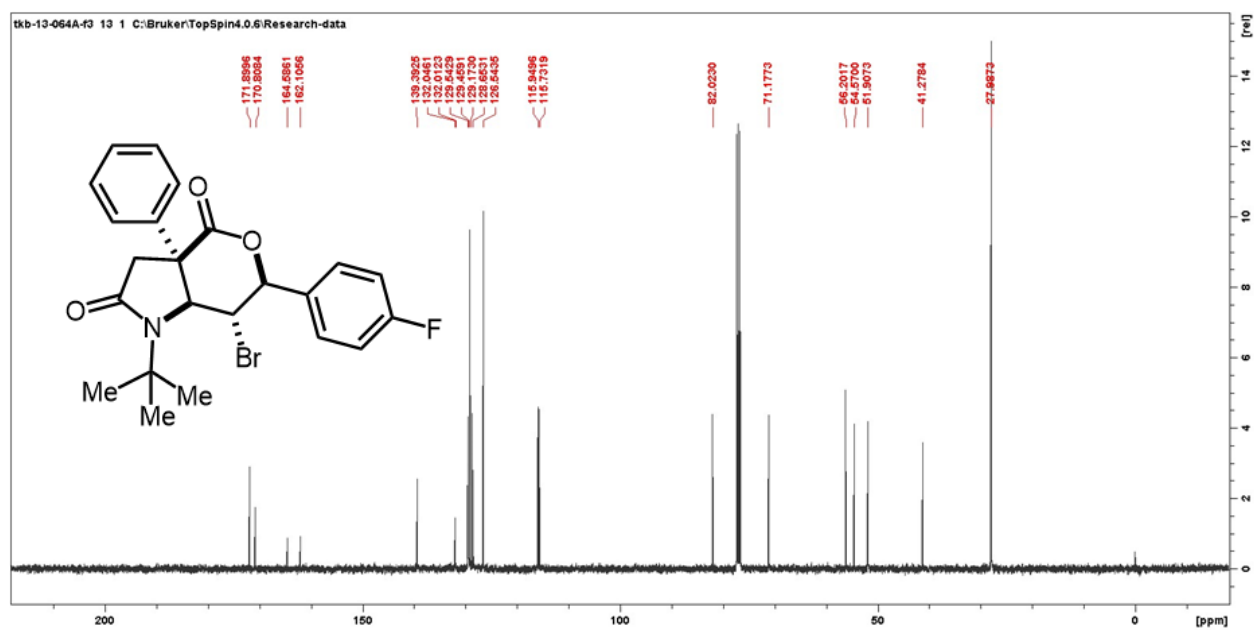

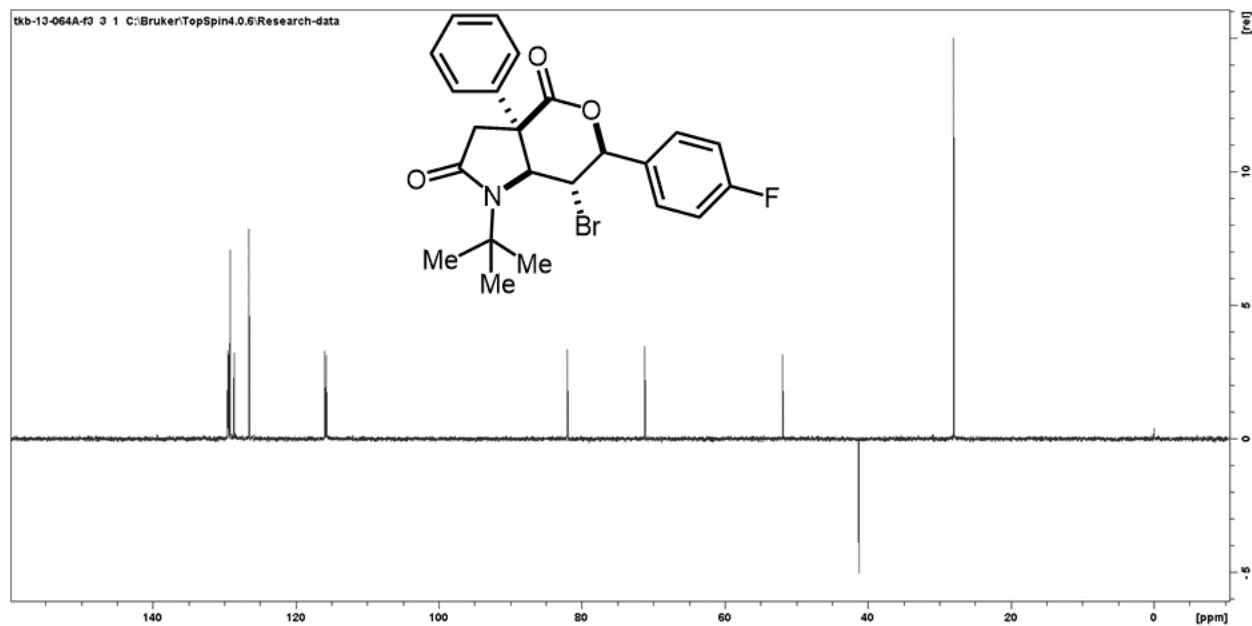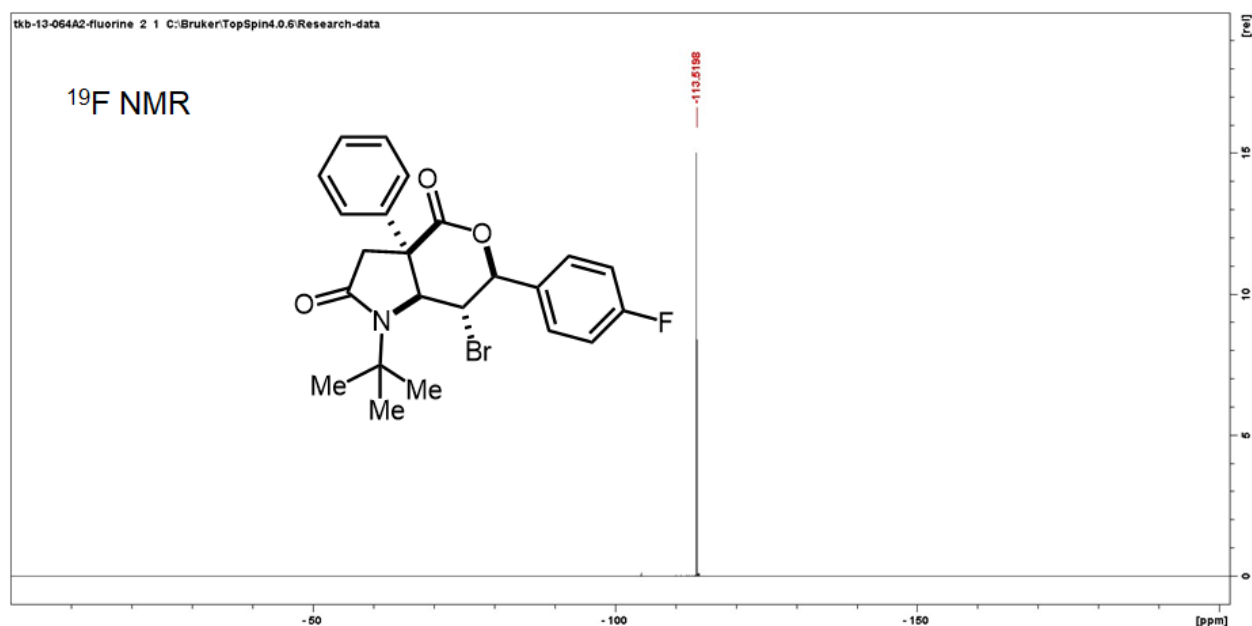

### Compound 4e

Prepared in 1 mmol scale using **General Procedure A**. Purification: Flash chromatography on silica eluting with hexane/EtOAc (60:40). Amorphous solid. Yield = 358.7 mg, 76%, 95:5 dr.

<sup>1</sup>H NMR (400 MHz, CDCl<sub>3</sub>) δ 7.46 – 7.24 (m, 7H), 7.04 – 6.93 (m, 2H), 5.78 (d, *J* = 10.4 Hz, 1H), 4.94 (t, *J* = 10.3 Hz, 1H), 4.35 (d, *J* = 10.1 Hz, 1H), 3.88 (s, 3H), 3.25 (d, *J* = 17.6 Hz, 1H), 3.18 (d, *J* = 17.6 Hz, 1H), 1.27 (s, 9H). <sup>13</sup>C NMR (101 MHz, CDCl<sub>3</sub>) δ 172.2, 171.2, 157.5, 139.9, 131.1, 129.1, 128.5, 126.5, 124.0, 120.7, 111.6, 80.8, 70.9, 56.0, 55.9, 54.6, 50.2, 40.9, 28.0. FTIR

(KBr): 2932.5, 1721.4, 1665.4, 1607.2, 1511.1, 1431.8, 1414.7, 1344.9, 1298.4, 1245.6, 1179.4, 1135.3, 1031.8, 996.7, 921.8, 832.1, 701.6. HRMS calc for C<sub>24</sub>H<sub>26</sub>BrNO<sub>4</sub> 471.1045, found 471.1049.

File :C:\GCMS\Beng Research\Data\TKB-13-061B-TUBE27.D  
 Operator : Beng  
 Acquired : 20 Feb 2021 11:08 using AcqMethod 180-280C-20190419.M  
 Instrument : Instrument #1  
 Sample Name:  
 Misc Info :  
 Vial Number: 1

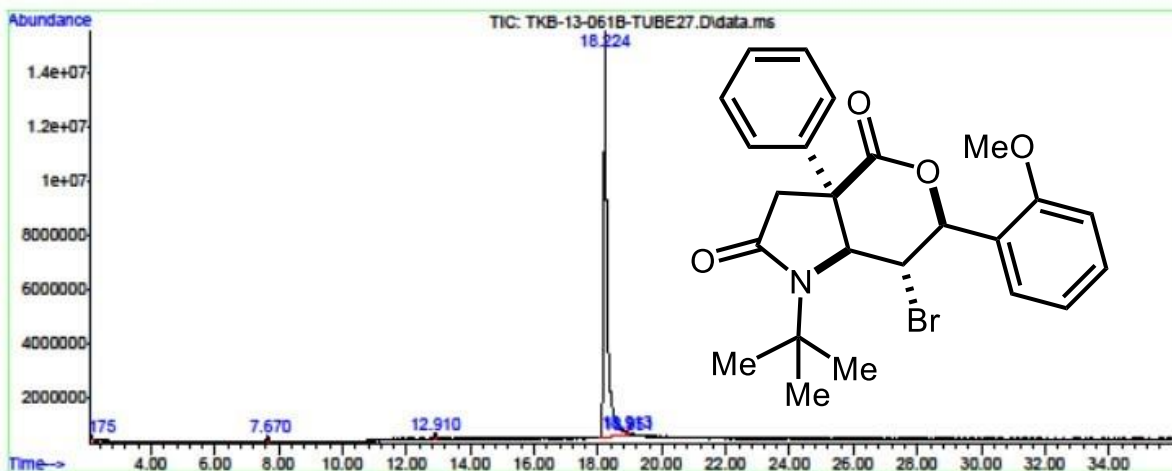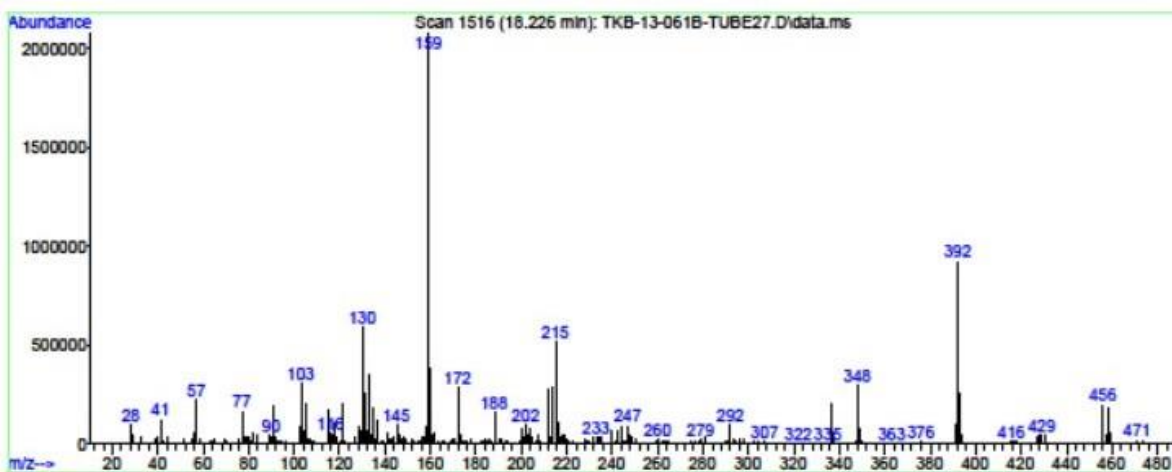



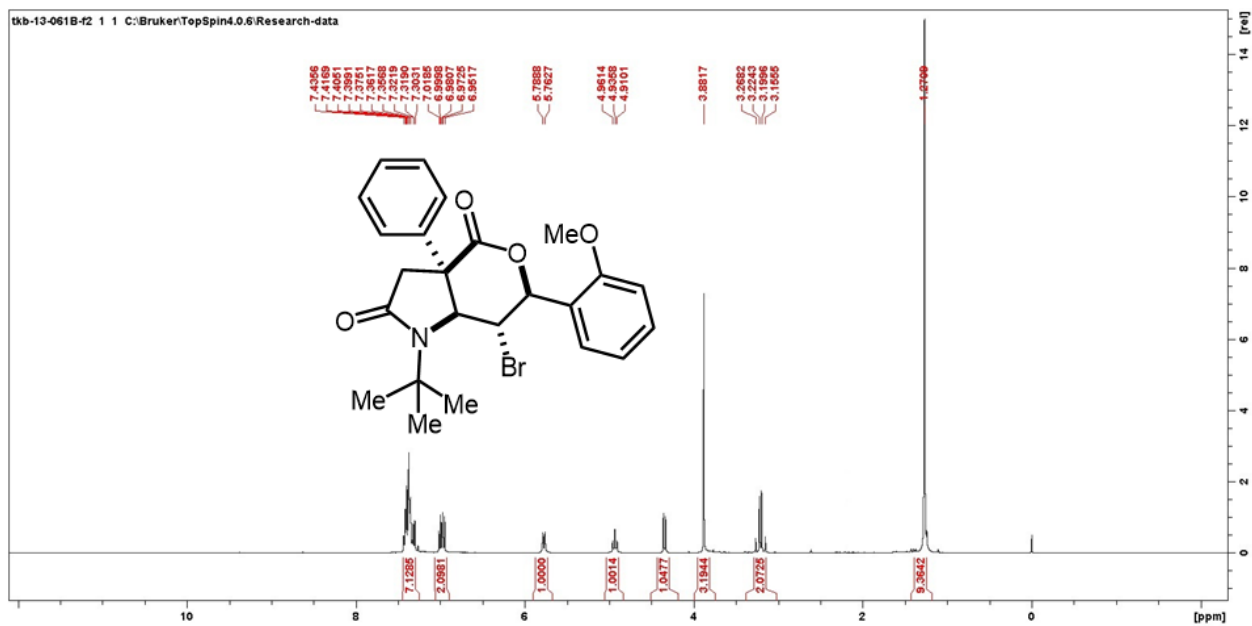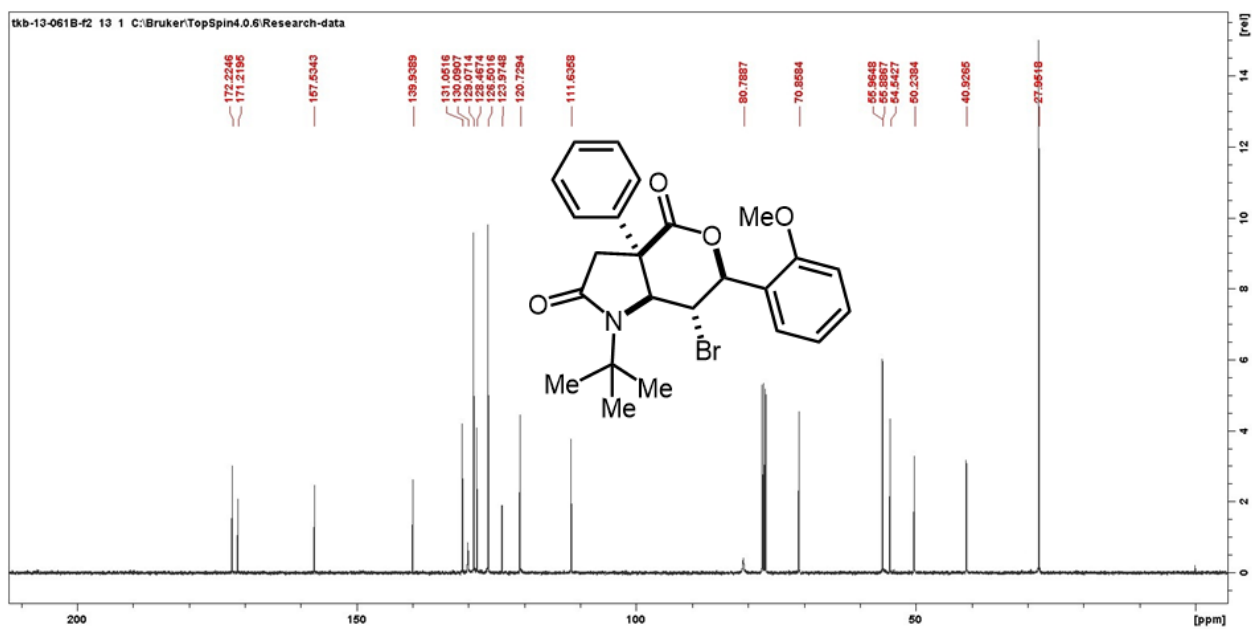

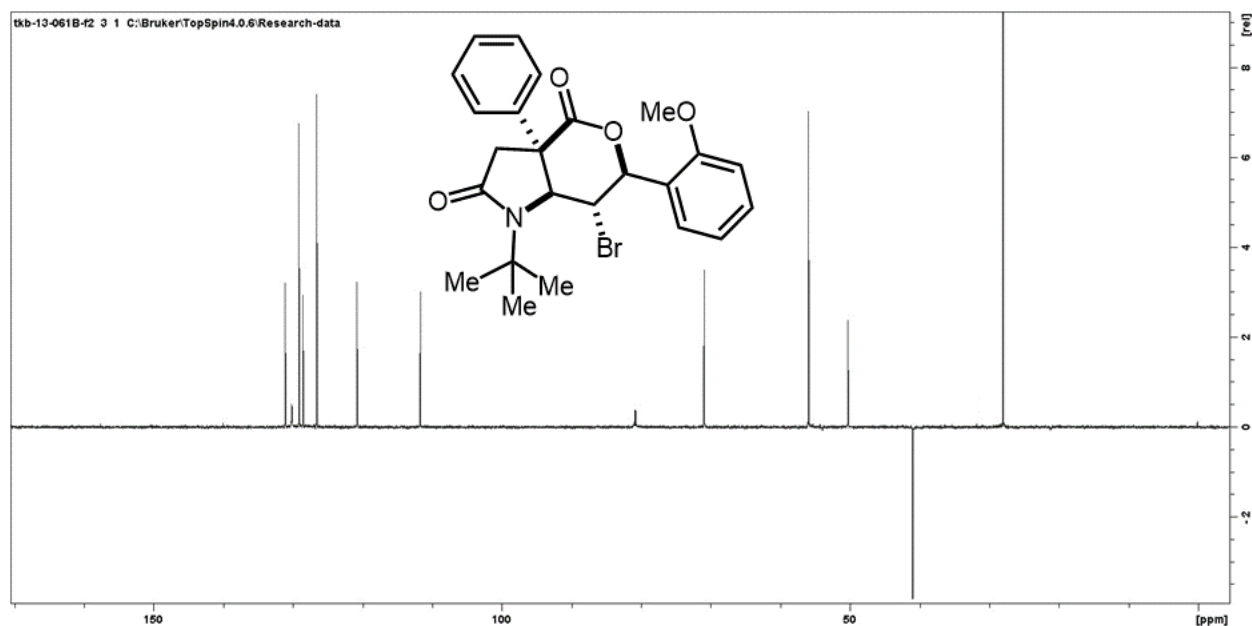

### Compound 4f

Prepared in 1 mmol scale using **General Procedure A**. Purification: Flash chromatography on silica eluting with hexane/EtOAc (50:50). Amorphous solid. Yield = 418 mg, 86%, 95:5 dr.

$^1\text{H}$  NMR (400 MHz,  $\text{CDCl}_3$ )  $\delta$  7.57 – 7.45 (m, 3H), 7.37 – 7.33 (m, 1H), 7.21 – 7.17 (m, 3H), 6.96 (dt,  $J = 6.1, 3.4$  Hz, 2H), 6.26 (s, 1H), 6.03 (d,  $J = 1.1$  Hz, 1H), 3.67 (d,  $J = 17.3$  Hz, 1H), 3.20 (d,  $J = 17.3$  Hz, 1H), 1.63 (s, 9H).  $^{13}\text{C}$  NMR (101 MHz,  $\text{CDCl}_3$ )  $\delta$  171.3, 167.2, 151.1, 136.6, 132.9, 131.1, 129.4, 128.9, 128.4, 128.2, 127.3, 124.9, 89.6, 63.7, 60.1, 56.7, 52.8, 39.3, 28.1. FTIR (KBr): 2972.8, 1728.5, 1669.3, 1606.9, 1511.0, 1448.5, 1414.7, 1384.9, 1357.4, 1298.7, 1247.5, 1179.3, 1135.9, 1031.8, 992.8, 833.0, 755.2. HRMS calc for  $\text{C}_{23}\text{H}_{23}\text{BrN}_2\text{O}_5$  486.0790, found 486.0797.

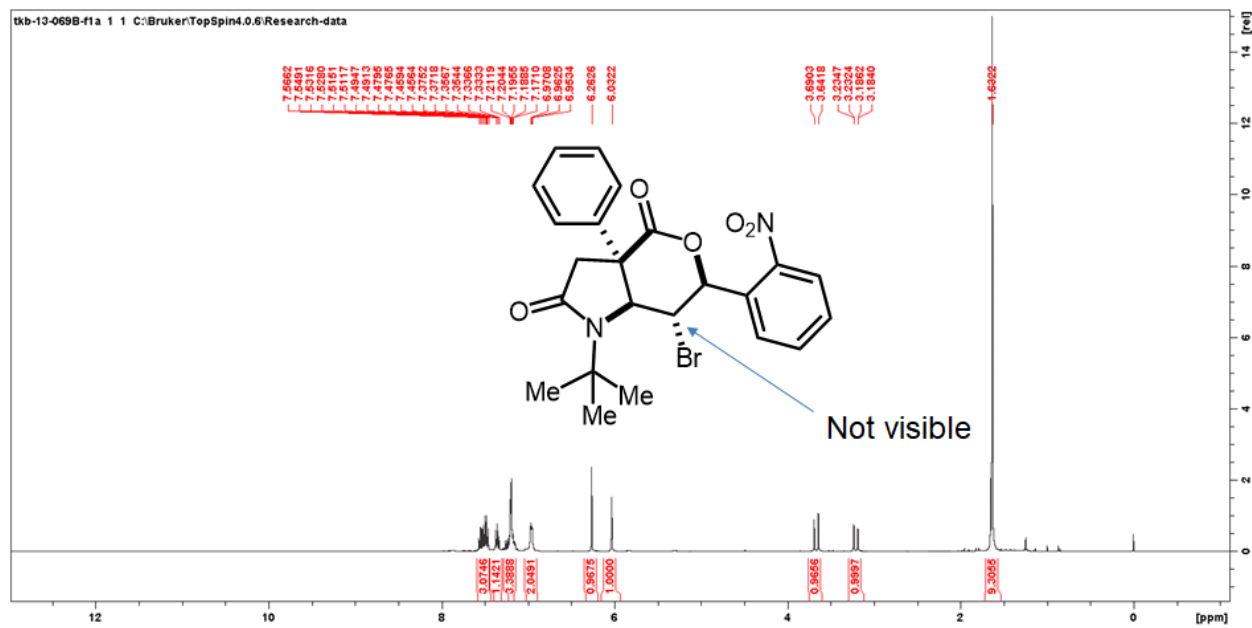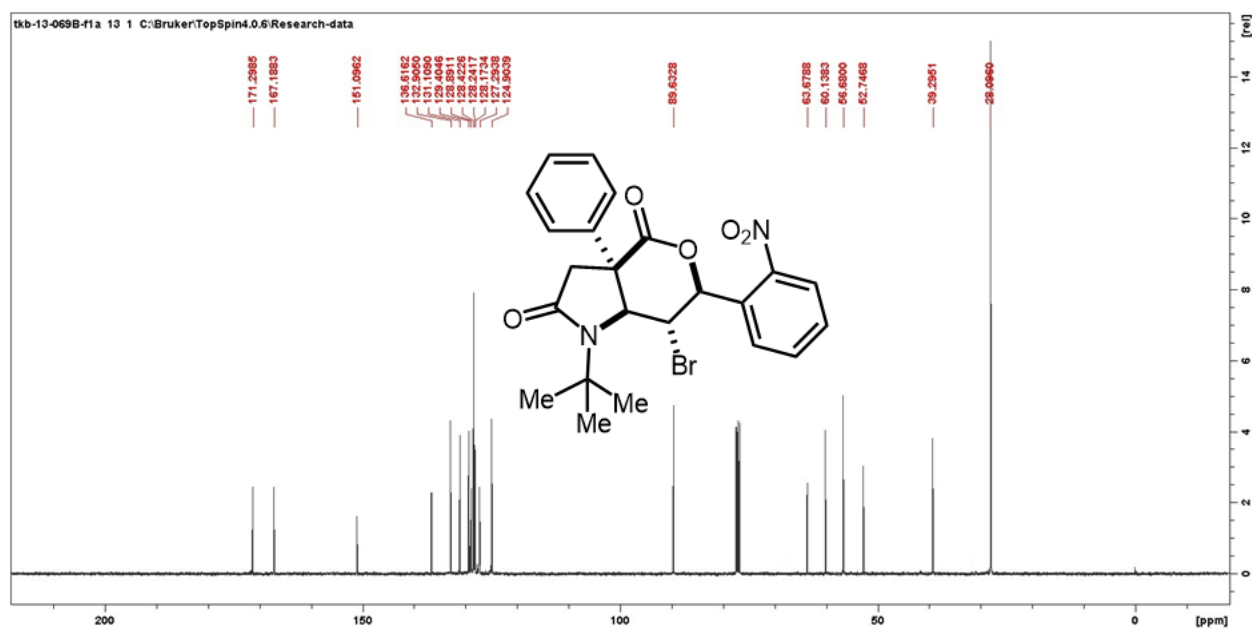

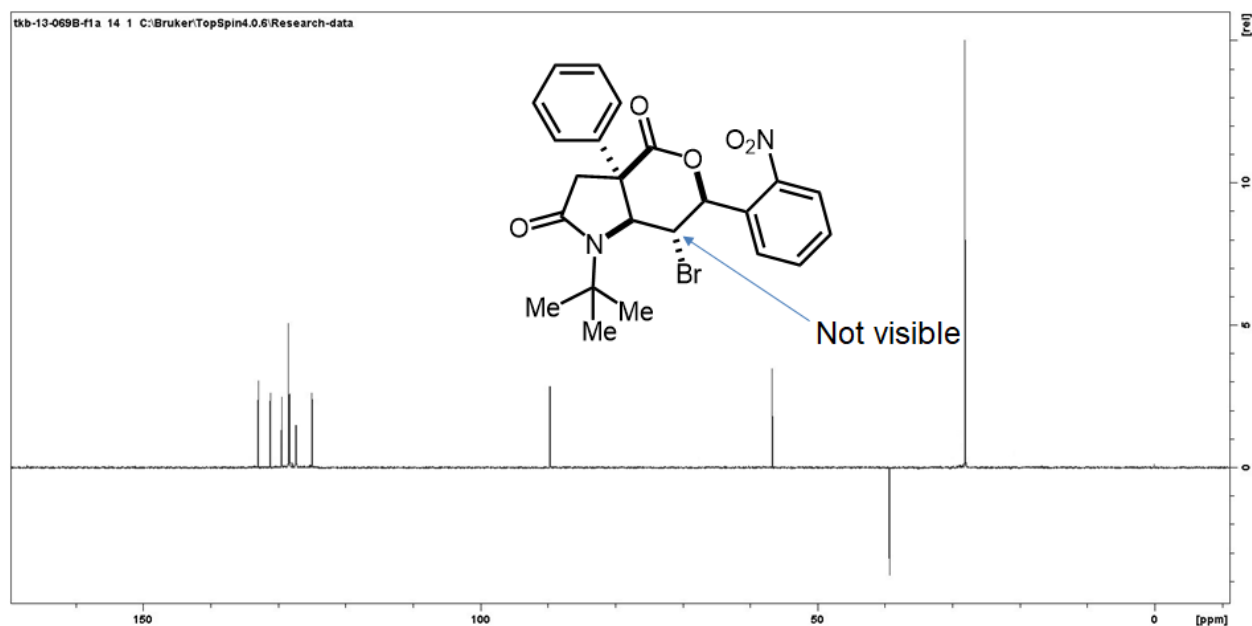

### Compound 4g

Prepared in 1 mmol scale using **General Procedure A**. Purification: Flash chromatography on silica eluting with hexane/EtOAc (85:15). Oily substance. Yield = 346.7 mg, 81%, 50:50 dr.  $^1\text{H}$  NMR (400 MHz,  $\text{CDCl}_3$ )  $\delta$  6.90 – 6.70 (m, 20H), 4.91 (d,  $J = 10.7$  Hz, 1H), 4.57 (d,  $J = 9.8$  Hz, 1H), 4.35 (s, 1H), 4.13 – 3.90 (m, 4H), 3.51 (p,  $J = 6.9$  Hz, 1H), 3.25 (p,  $J = 6.8$  Hz, 1H), 2.97 (d,  $J = 17.0$  Hz, 1H), 2.57 (d,  $J = 17.5$  Hz, 1H), 0.94 – 0.86 (m, 9H), 0.66 (d,  $J = 6.8$  Hz, 3H).  $^{13}\text{C}$  NMR (101 MHz,  $\text{CDCl}_3$ )  $\delta$  176.1, 171.6, 170.7, 170.7, 139.3, 137.4, 135.9, 135.5, 129.4, 129.2, 129.1, 128.7, 128.3, 128.3, 128.2, 128.0, 127.9, 125.8, 125.8, 83.4, 80.9, 71.3, 68.2, 53.7, 52.4, 51.1, 50.9, 48.7, 46.1, 44.5, 42.6, 20.1, 20.0, 19.7, 18.1. FTIR (KBr): 2934.6, 1721.8, 1669.4, 1608.2, 1511.1, 1431.8, 1414.7, 1344.9, 1298.4, 1245.6, 1179.4, 1135.3, 1031.8, 996.7, 921.8, 832.1, 701.9. HRMS calc for  $\text{C}_{22}\text{H}_{22}\text{BrNO}_3$  427.0783, found 427.0715.

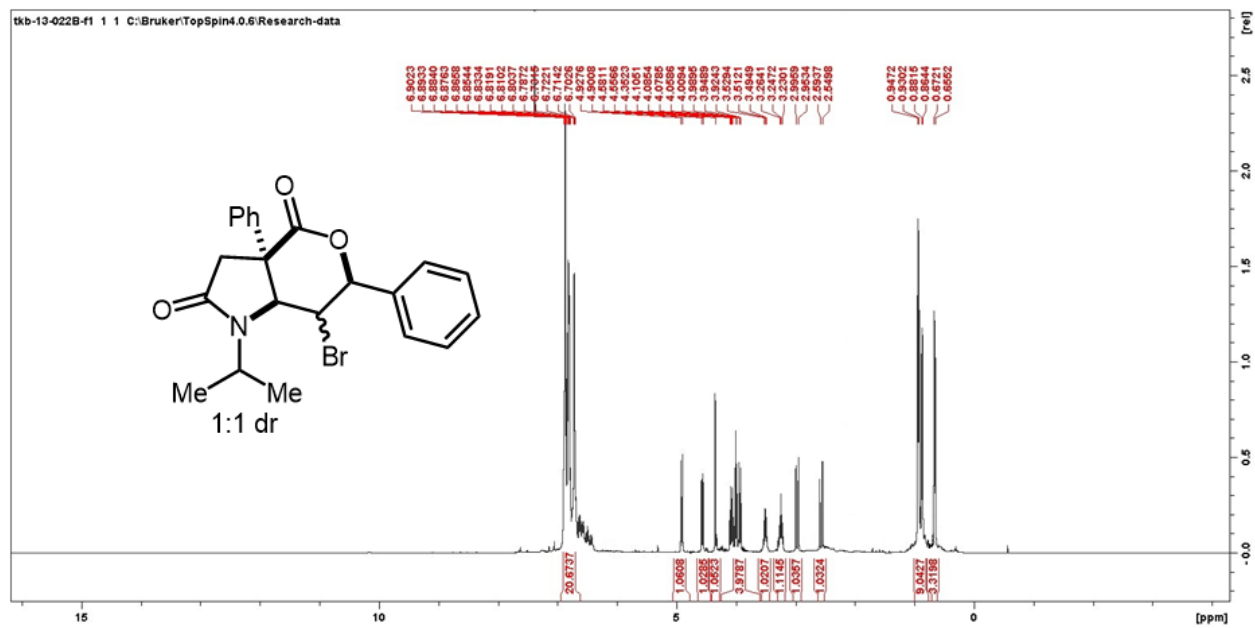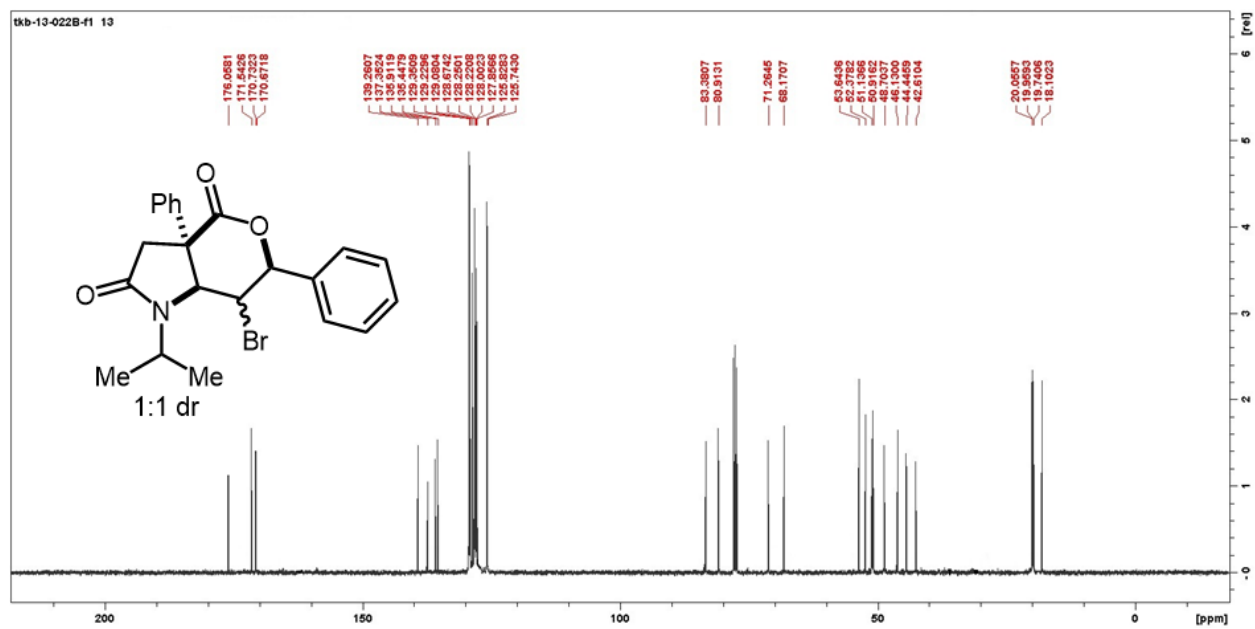

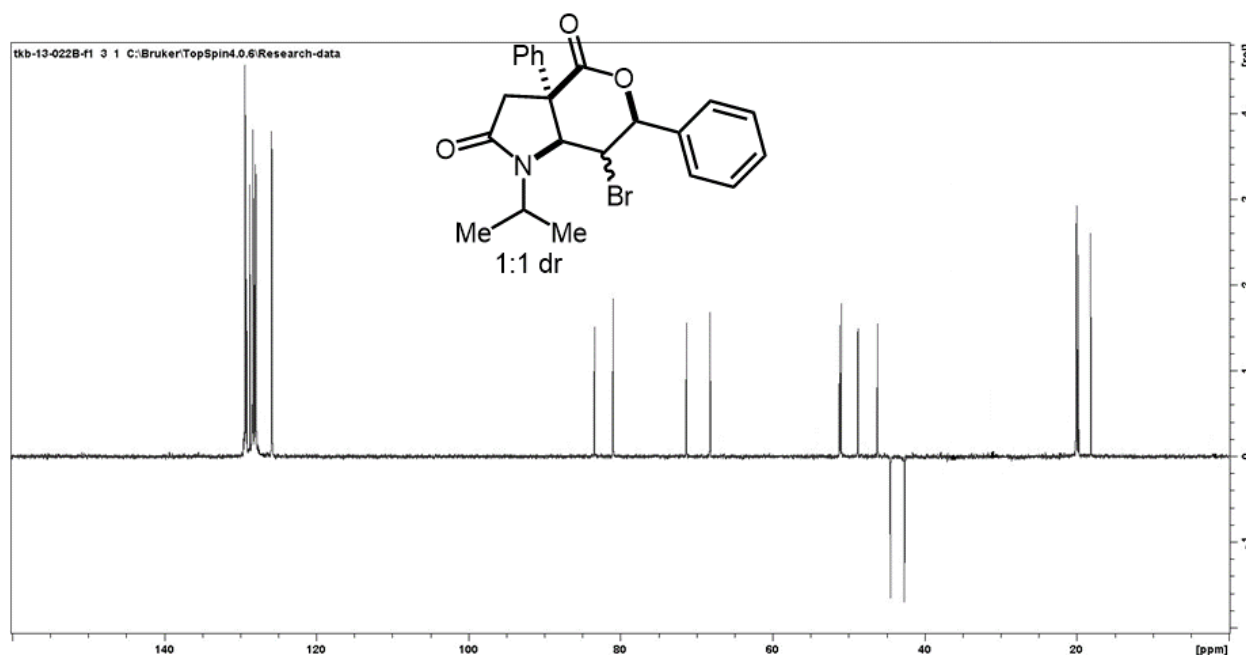

### Compound 4h

Prepared in 1 mmol scale using **General Procedure A**. Purification: Flash chromatography on silica eluting with hexane/EtOAc (85:15). Oily substance. Yield = 328.3 mg, 77%, 50:50 dr.  $^1\text{H}$  NMR (400 MHz,  $\text{CDCl}_3$ )  $\delta$  7.44 – 7.26 (m, 10H), 5.34 – 5.23 (m, 2H), 4.59 – 4.43 (m, 2H), 3.53 (dd,  $J = 17.6, 2.5$  Hz, 0.5H), 3.19 (dd,  $J = 17.6, 2.6$  Hz, 0.5H), 2.84 (dd,  $J = 17.6, 2.5$  Hz, 1H), 1.05 – 0.72 (m, 4H).  $^{13}\text{C}$  NMR (101 MHz,  $\text{CDCl}_3$ )  $\delta$  178.5, 178.4, 172.1, 172.1, 139.0, 137.0, 136.2, 135.3, 129.7, 129.7, 129.4, 129.0, 128.7, 128.7, 128.2, 128.0, 126.1, 125.8, 82.1, 81.1, 77.7, 77.6, 77.3, 77.3, 77.0, 77.0, 71.6, 69.1, 53.3, 52.6, 51.4, 49.7, 49.7, 44.6, 43.2, 25.5, 23.7, 9.6, 8.2, 6.7, 5.8. FTIR (KBr): 2984.1, 1723.4, 1669.4, 1608.2, 1511.1, 1431.8, 1414.7, 1344.9, 1298.4, 1135.3, 1031.8, 996.7, 702.4. HRMS calc for  $\text{C}_{22}\text{H}_{20}\text{BrNO}_3$  425.0627, found 425.0622.

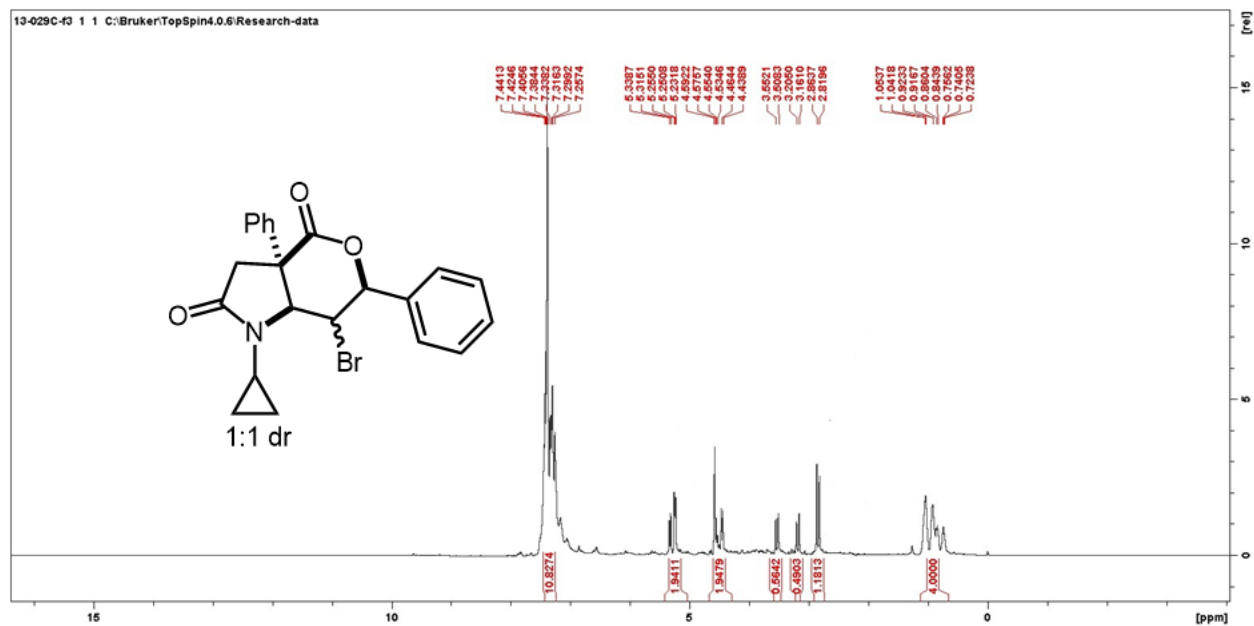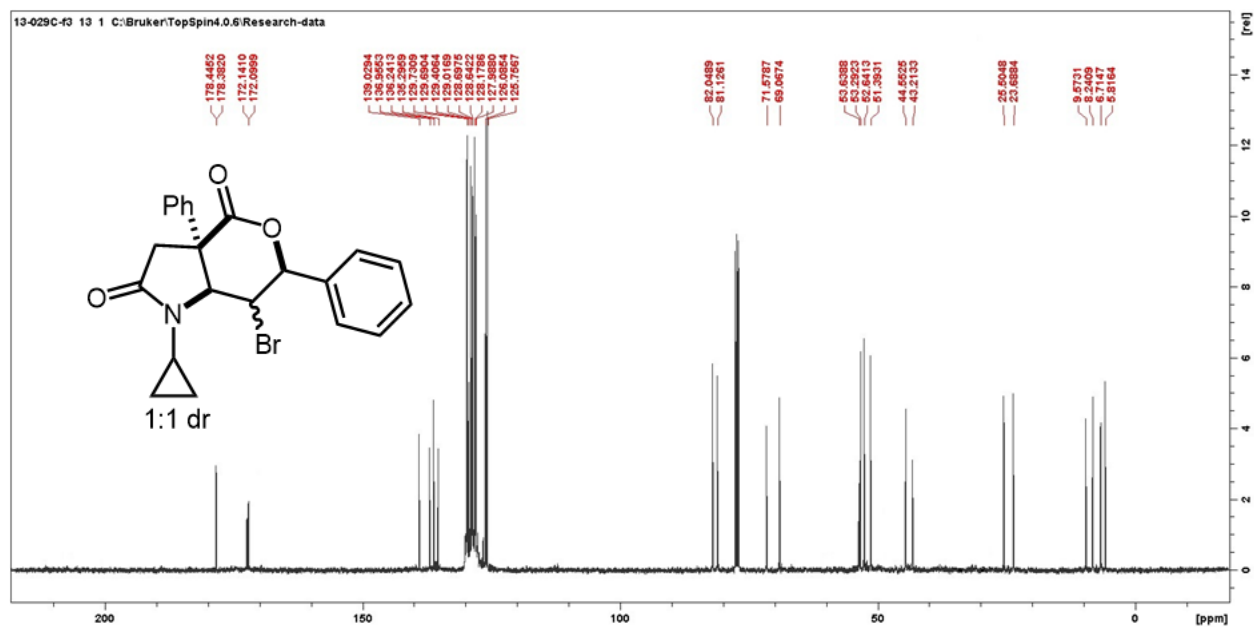

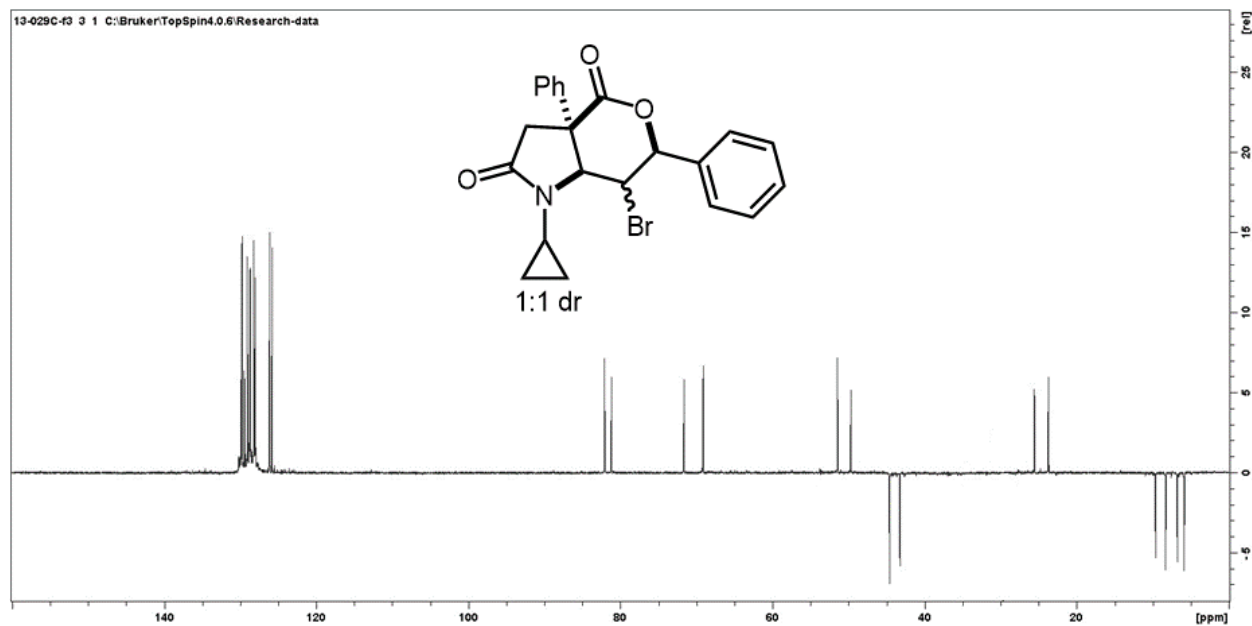

### Compound 4i

Prepared in 1 mmol scale using **General Procedure A**. Purification: Flash chromatography on silica eluting with hexane/EtOAc (70:30). Oily substance. Yield = 385.6 mg, 81%, 95:5 dr.

$^1\text{H}$  NMR (400 MHz,  $\text{CDCl}_3$ )  $\delta$  7.36 – 7.11 (m, 14H), 5.52 (s, 1H), 4.82 (d,  $J = 10.8$  Hz, 1H), 4.33 (d,  $J = 10.8$  Hz, 1H), 4.11 (dd,  $J = 9.8, 4.7$  Hz, 2H), 3.38 (d,  $J = 17.7$  Hz, 1H), 3.28 (d,  $J = 17.7$  Hz, 1H), 2.36 (s, 3H).  $^{13}\text{C}$  NMR (101 MHz,  $\text{CDCl}_3$ )  $\delta$  176.9, 175.4, 138.8, 137.4, 137.3, 136.7, 136.2, 130.1, 129.9, 129.9, 129.3, 129.0, 128.0, 128.0, 127.5, 126.4, 126.3, 125.0, 68.8, 53.1, 50.7, 44.5, 21.3. FTIR (KBr): 2935.4, 1727.5, 1696.3, 1604.9, 1511.0, 1448.5, 1414.7, 1384.9, 1357.4, 1298.7, 1247.5, 1179.3, 1135.9, 1031.8, 995.8, 831.0. HRMS calc for  $\text{C}_{26}\text{H}_{22}\text{BrNO}_3$  475.0783, found 475.0788.



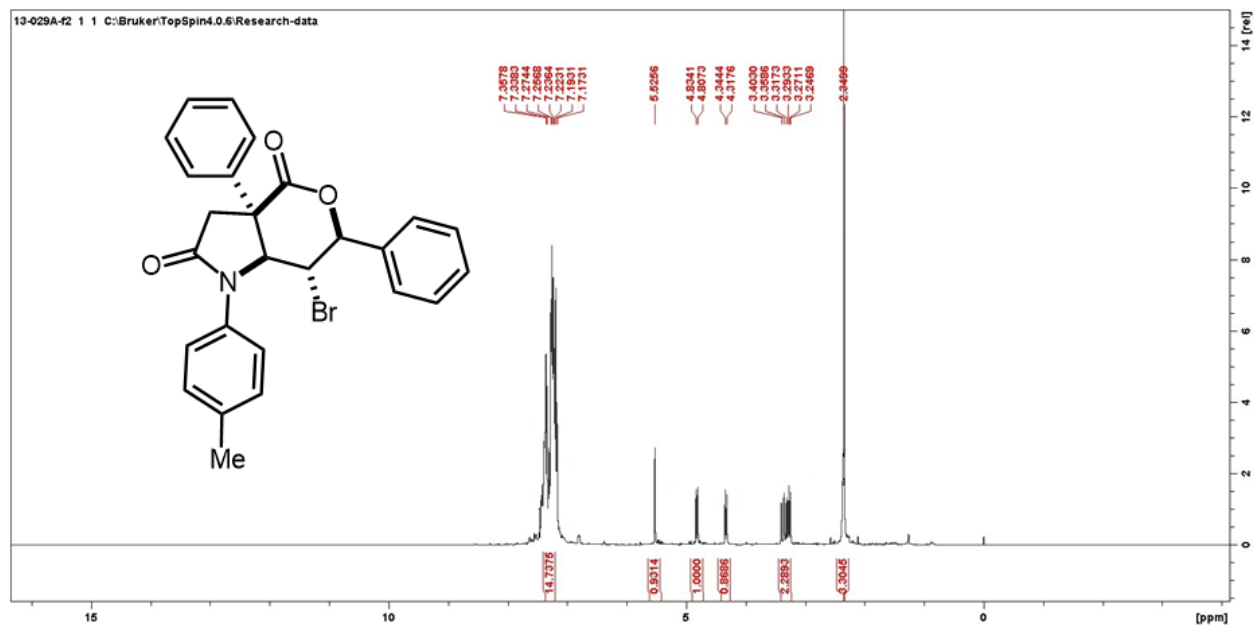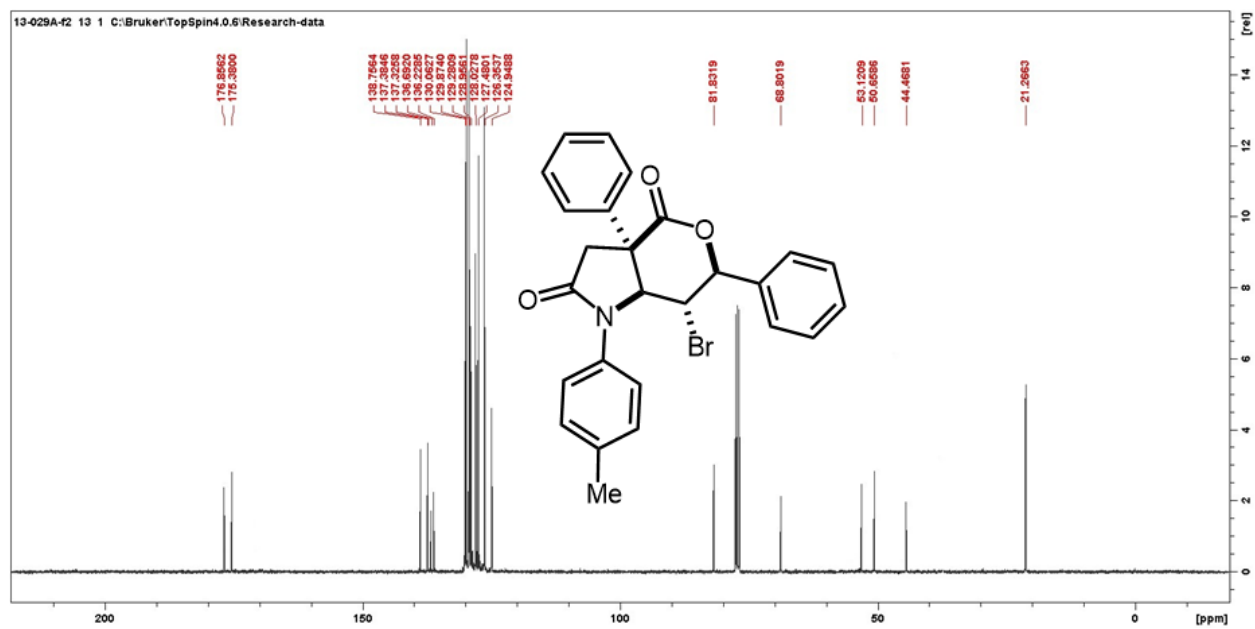

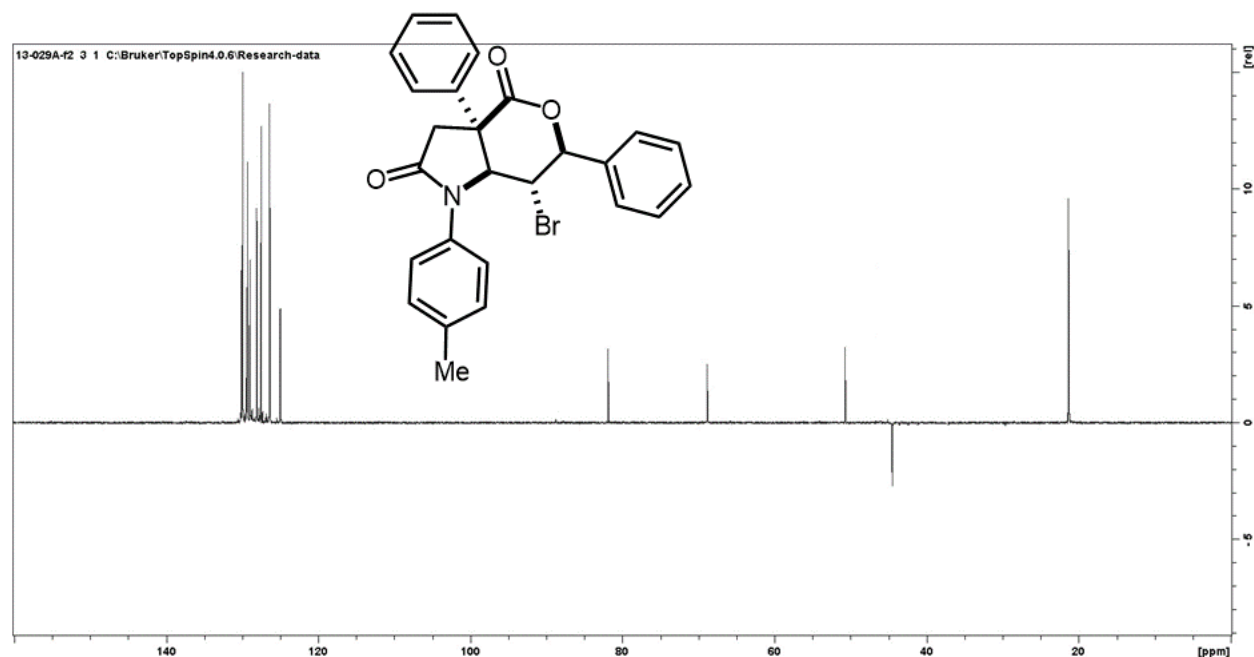

### Compound 4j

Prepared in 1 mmol scale using **General Procedure A**. Purification: Flash chromatography on silica eluting with hexane/EtOAc (80:20). Oily substance. Yield = 464.5 mg, 79%, 95:5 dr.

$^1\text{H}$  NMR (400 MHz,  $\text{CDCl}_3$ )  $\delta$  7.80 – 7.77 (m, 4H), 7.53 – 7.25 (m, 10H), 5.56 (s, 1H), 4.80 (d,  $J$  = 10.8 Hz, 1H), 4.35 (d,  $J$  = 10.8 Hz, 1H), 3.01-2.96 (m, 2H).  $^{13}\text{C}$  NMR (101 MHz,  $\text{CDCl}_3$ )  $\delta$  176.3, 175.9, 138.5, 138.4, 136.9, 136.3, 135.9, 134.8, 130.0, 129.4, 129.0, 128.1, 128.0, 127.4, 126.4, 126.2, 91.9, 81.7, 68.3, 53.0, 50.7. FTIR (KBr): 2924.8, 1642.2, 1494.9, 1448.8, 1427.0, 1393.4, 1361.6, 1328.7, 1289.7, 1223.6, 1198.9, 1130.1, 1074.1, 1030.4, 988.5, 966.1, 925.5, 741.6, 693.4. HRMS calc for  $\text{C}_{25}\text{H}_{19}\text{BrINO}_3$  586.9593, found 586.9588.

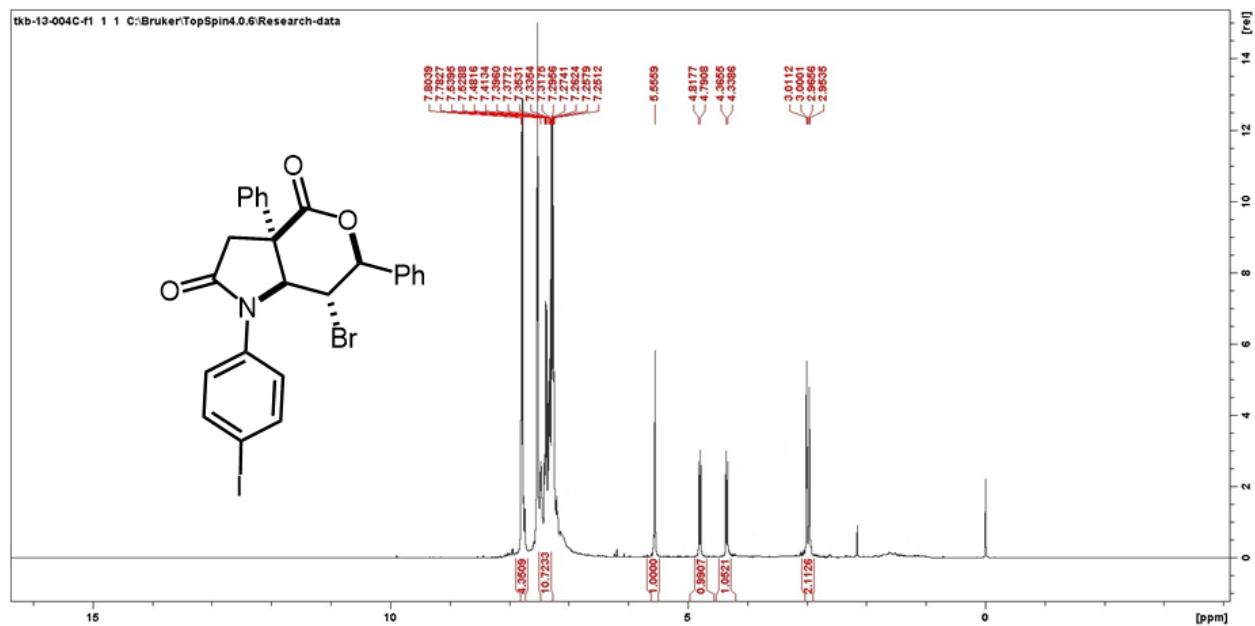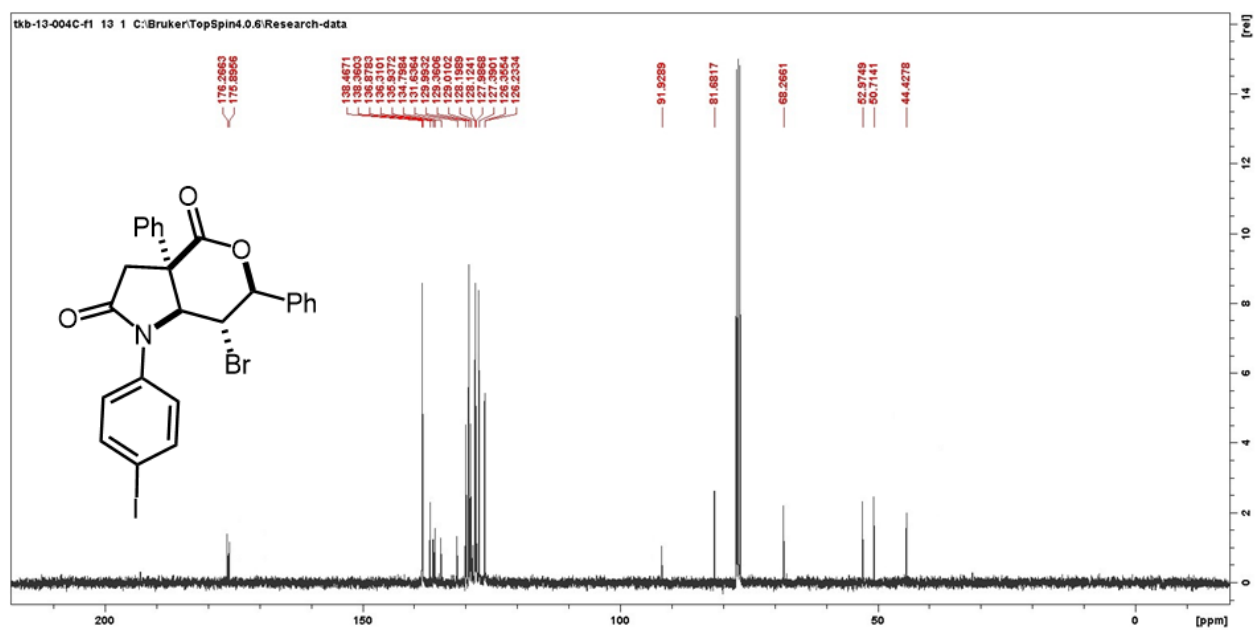

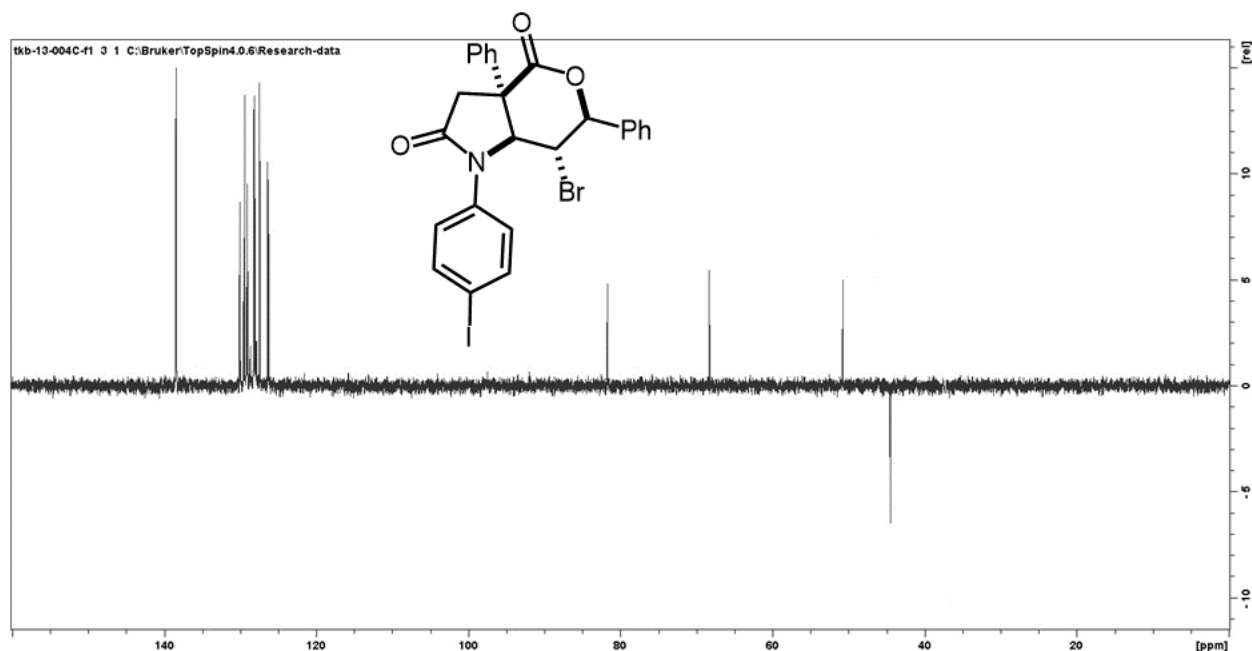

### Compound 4k

Prepared in 1 mmol scale using **General Procedure A**. Purification: Flash chromatography on silica eluting with hexane/EtOAc (50:50). Oily substance. Yield = 453.3 mg, 87%, 95:5 dr.

$^1\text{H}$  NMR (400 MHz,  $\text{CDCl}_3$ )  $\delta$  7.77 (d,  $J = 8.2$  Hz, 1H), 7.58 – 7.35 (m, 10H), 7.29 (d,  $J = 8.0$  Hz, 2H), 5.58 (s, 1H), 5.35 – 5.25 (m, 2H), 4.91 (d,  $J = 10.4$  Hz, 1H), 3.41 (d,  $J = 17.9$  Hz, 1H), 2.98 (d,  $J = 17.9$  Hz, 1H), 2.40 (s, 3H).  $^{13}\text{C}$  NMR (101 MHz,  $\text{CDCl}_3$ )  $\delta$  176.0, 169.9, 148.4, 137.5, 135.8, 133.6, 132.3, 131.1, 130.1, 130.1, 130.0, 130.0, 129.0, 125.9, 125.1, 124.9, 81.4, 68.3, 52.9, 44.7, 42.3, 21.2. FTIR (KBr): 2965.2, 2872.3, 1716.4, 1650.8, 1612.9, 1585.9, 1513.1, 1455.3, 1359.3, 1304.1, 1251.3, 1177.4, 1135.5, 1033.8, 996.7, 896.0, 833.6, 804.9. HRMS calc for  $\text{C}_{26}\text{H}_{21}\text{BrN}_2\text{O}_5$  520.0634, found 520.0634.

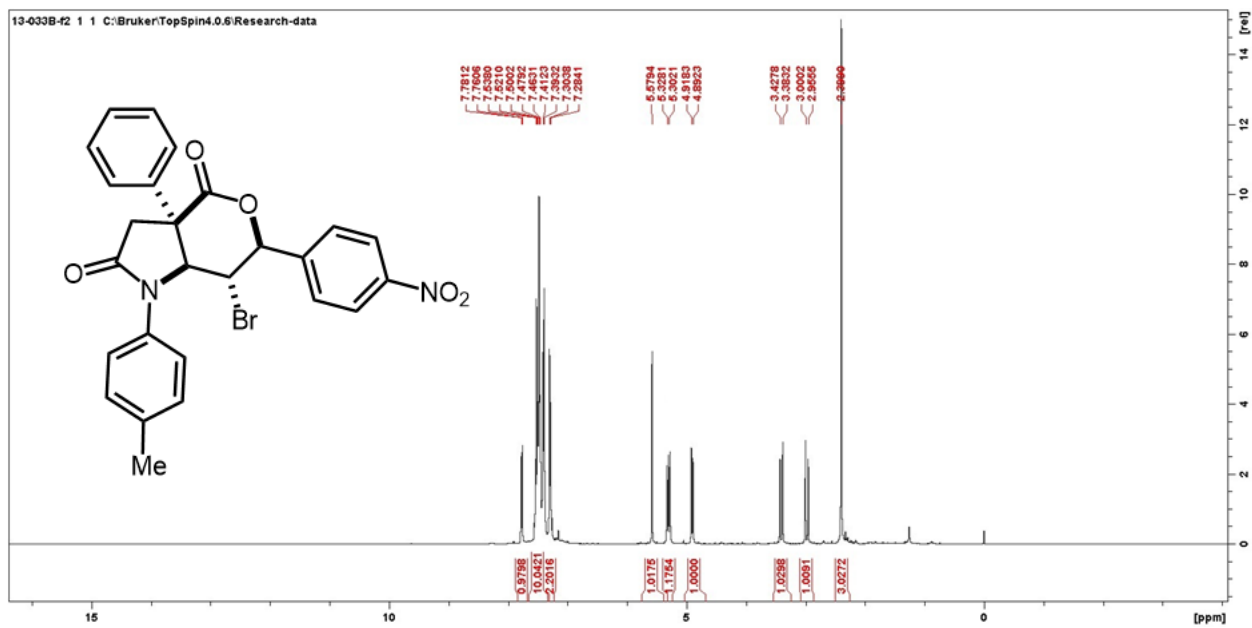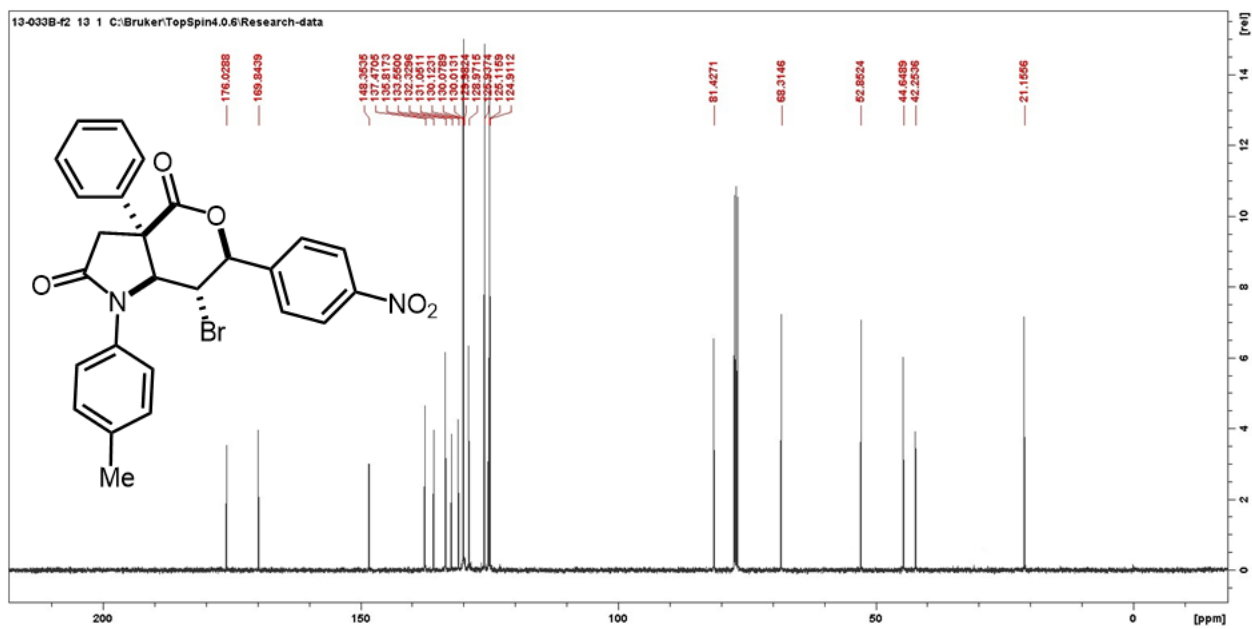

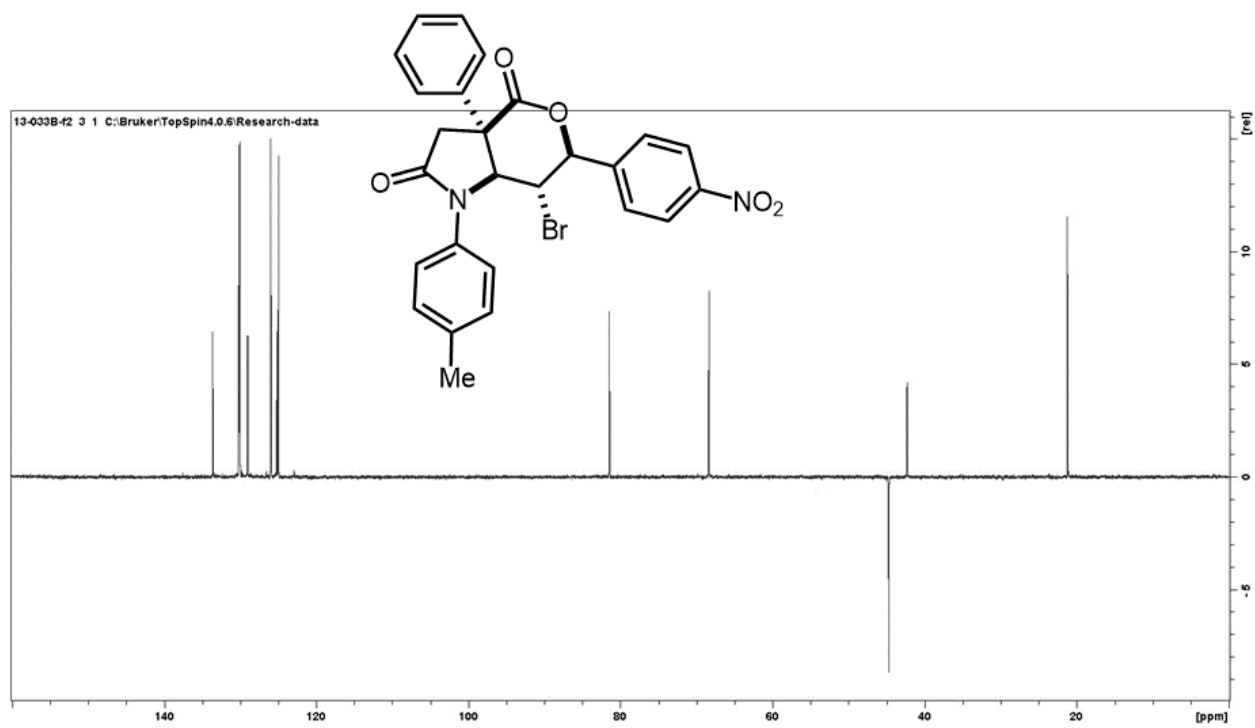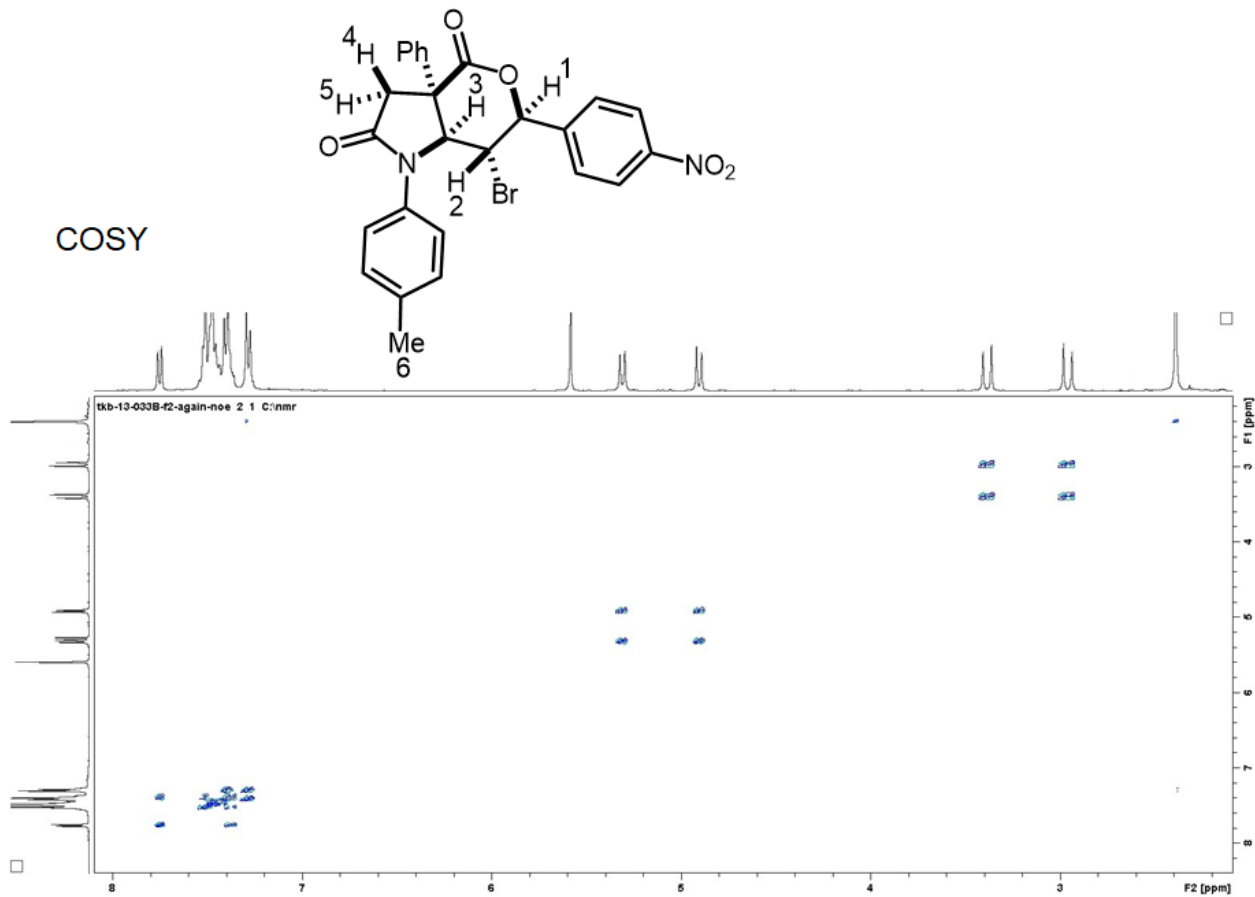

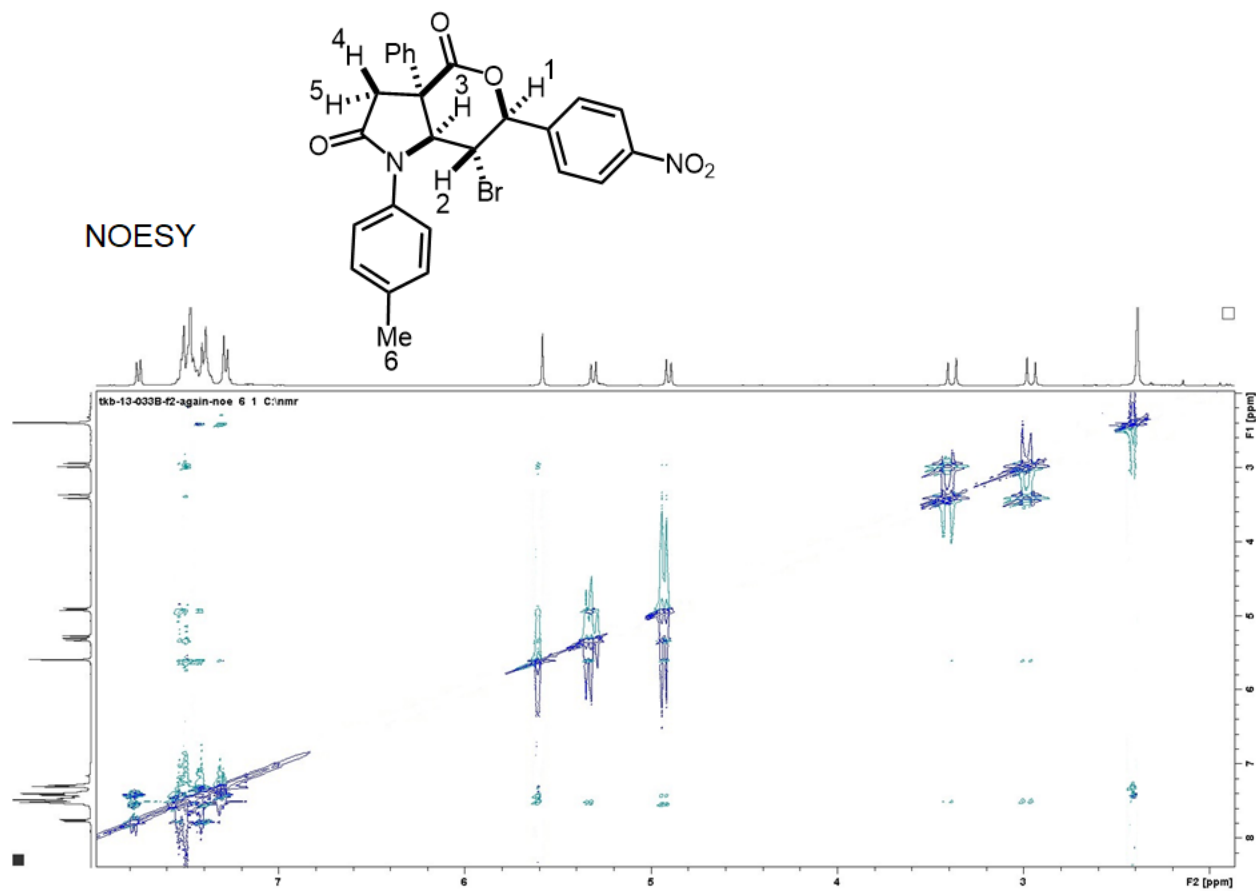

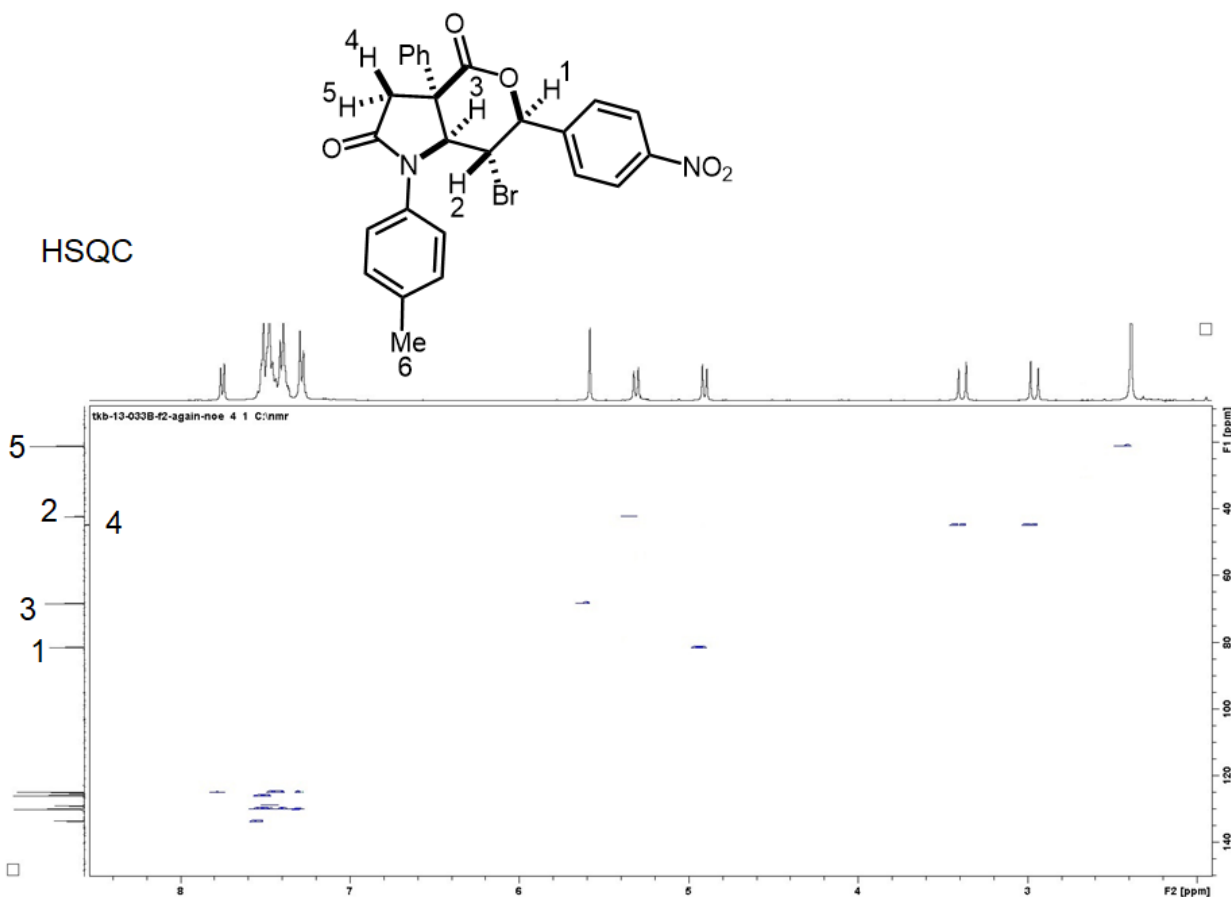

### Compound 4l

Prepared in 1 mmol scale using **General Procedure A**. Purification: Flash chromatography on silica eluting with hexane/EtOAc (50:50). Oily substance. Yield = 422.3 mg, 81%, 95:5 dr.  $^1\text{H}$  NMR (400 MHz, DMSO)  $\delta$  8.01 (d,  $J$  = 1.9 Hz, 2H), 7.63 – 7.54 (m, 2H), 7.57 – 7.43 (m, 7H), 7.24 – 7.22 (m, 2H), 5.47 (d,  $J$  = 1.0 Hz, 1H), 5.00 (d,  $J$  = 10.0 Hz, 1H), 4.86 ((d,  $J$  = 10.0 Hz, 1H), 3.17 – 2.99 (m, 2H), 2.32 (s, 3H).  $^{13}\text{C}$  NMR (101 MHz, DMSO)  $\delta$  176.6, 169.8, 148.0, 143.1, 137.4, 136.7, 133.4, 130.3, 129.9, 129.8, 128.7, 126.9, 125.8, 124.2, 82.9, 68.9, 52.9, 49.3, 44.5, 21.1. FTIR (KBr): 2933.4, 1721.5, 1666.3, 1606.9, 1511.0, 1448.5, 1414.7, 1384.9, 1357.4, 1298.7, 1247.5, 1179.3, 1137.9, 1033.8, 995.8, 831.7. HRMS calc for  $\text{C}_{26}\text{H}_{21}\text{BrN}_2\text{O}_5$  520.0634, found 520.0634.



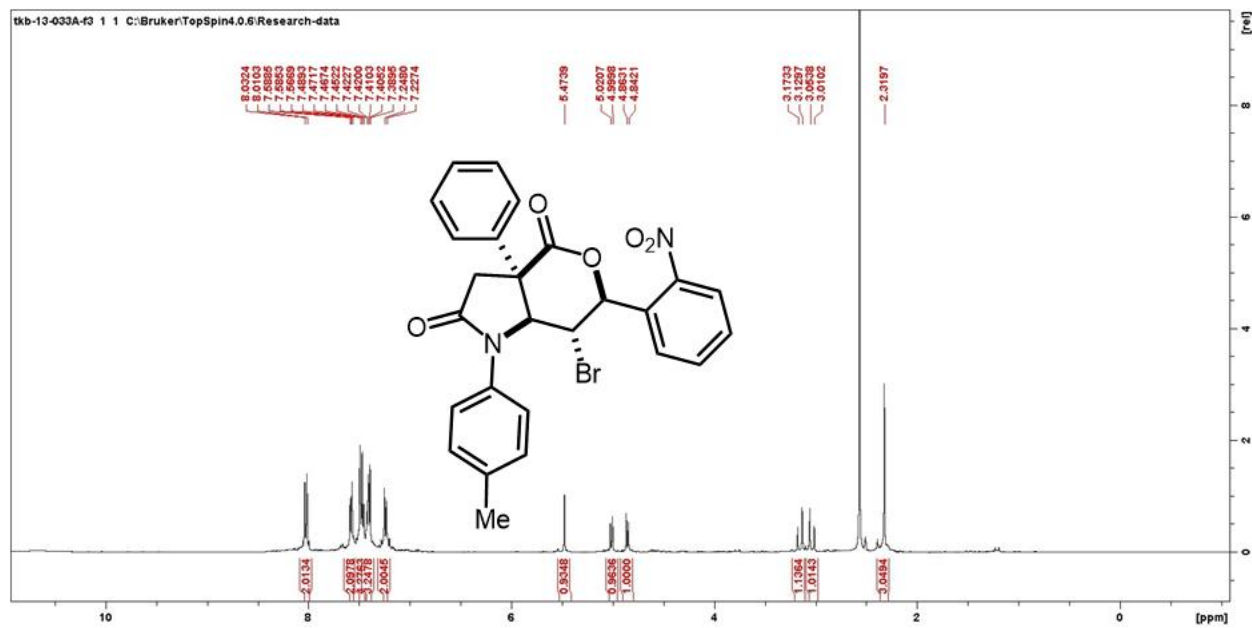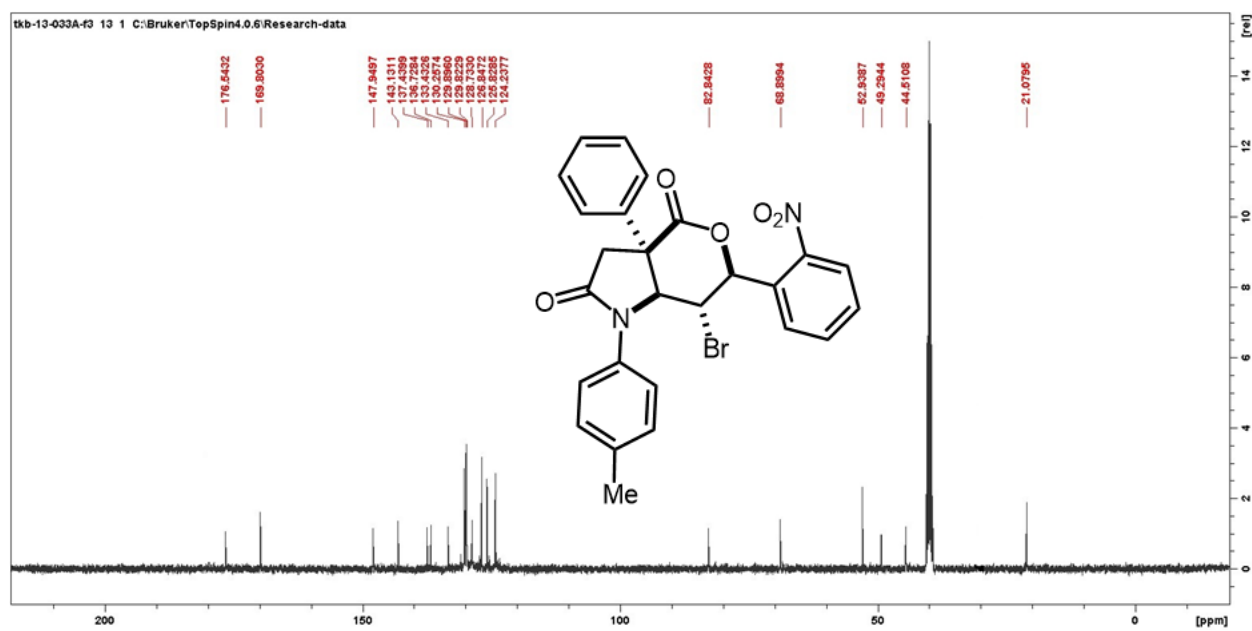

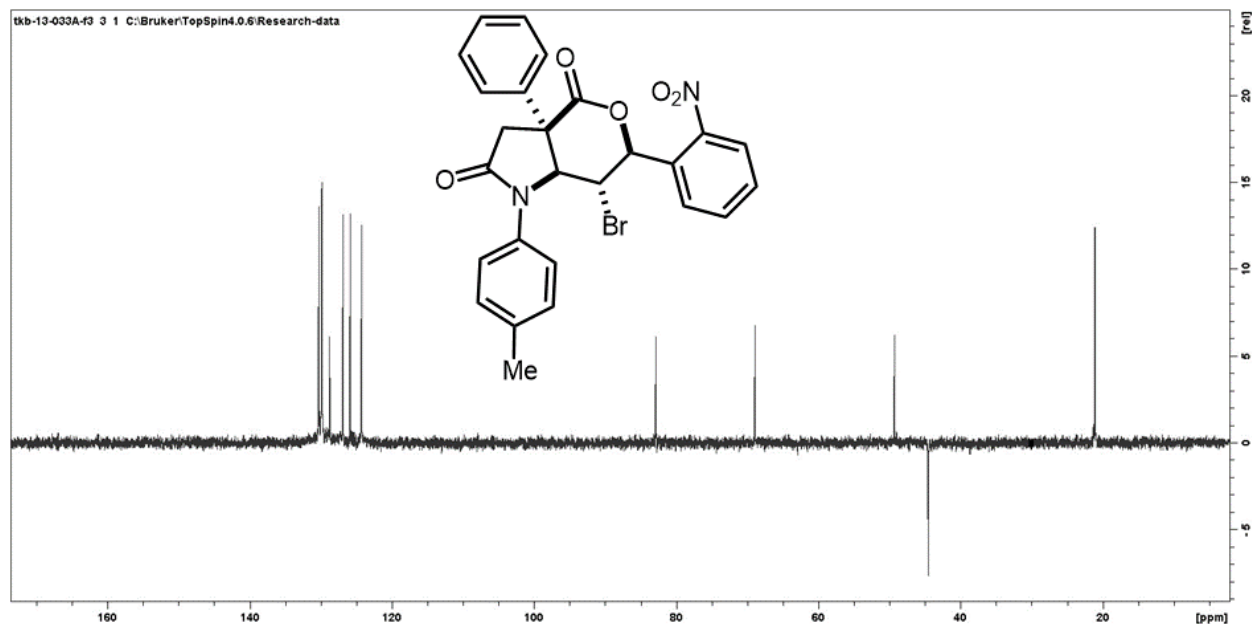

### Compound 4m

Prepared in 1 mmol scale using **General Procedure A**. Purification: Flash chromatography on silica eluting with hexane/EtOAc (50:50). Oily substance. Yield = 451.1 mg, 84%, 95:5 dr.

$^1\text{H}$  NMR (400 MHz,  $\text{CDCl}_3$ )  $\delta$  7.75 (d,  $J = 8.1$  Hz, 1), 7.63 – 7.32 (m, 10H), 7.03 – 6.98 (m, 2H), 5.54 (s, 1H), 5.30 (d,  $J = 10.5$  Hz, 1H), 4.90 (dd,  $J = 10.5, 5.0$  Hz, 1H), 3.82 (s, 3H), 3.35 (d,  $J = 3.1$  Hz, 1H), 2.97 (d,  $J = 3.1$  Hz, 1H).  $^{13}\text{C}$  NMR (101 MHz,  $\text{CDCl}_3$ )  $\delta$  176.1, 170.0, 158.7, 148.3, 135.9, 133.6, 131.0, 130.1, 130.0, 129.0, 127.6, 126.7, 126.0, 125.1, 114.8, 81.5, 68.6, 55.6, 52.9, 44.5, 42.4. FTIR (KBr): 2944.4, 1736.5, 1658.3, 1606.9, 1511.0, 1448.5, 1414.7, 1384.9, 1357.4, 1298.7, 1247.5, 1179.3, 1135.9, 1031.8, 995.9, 833.7, 755.2. HRMS calc for  $\text{C}_{26}\text{H}_{21}\text{BrN}_2\text{O}_6$  536.0583, found 536.0589.

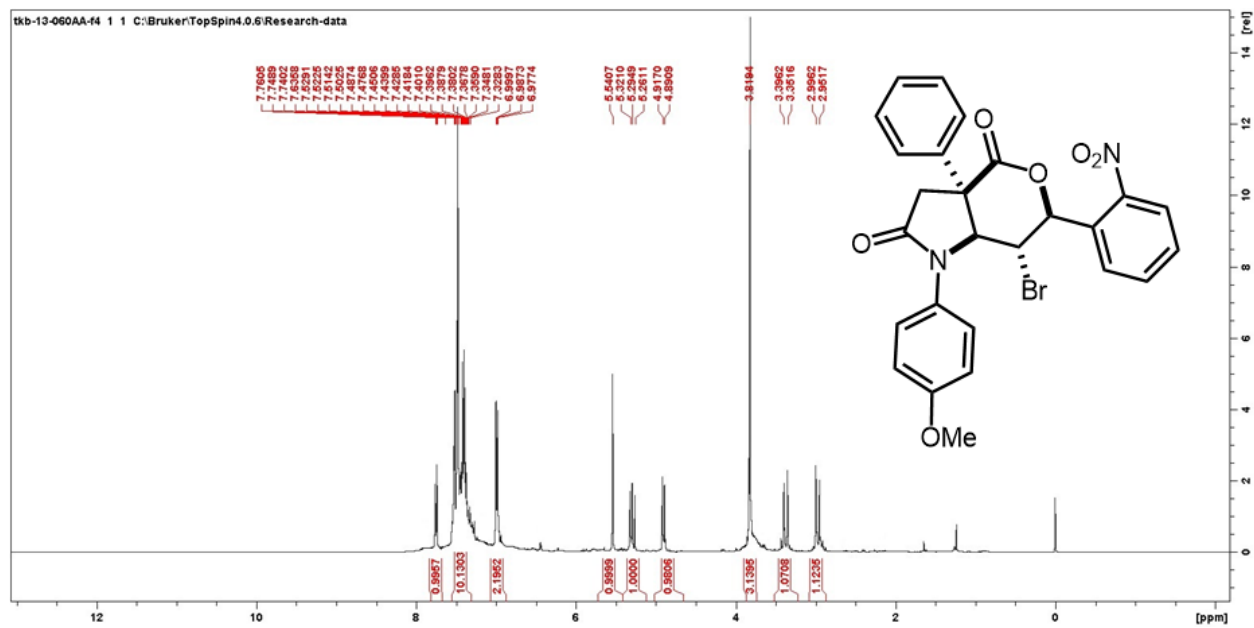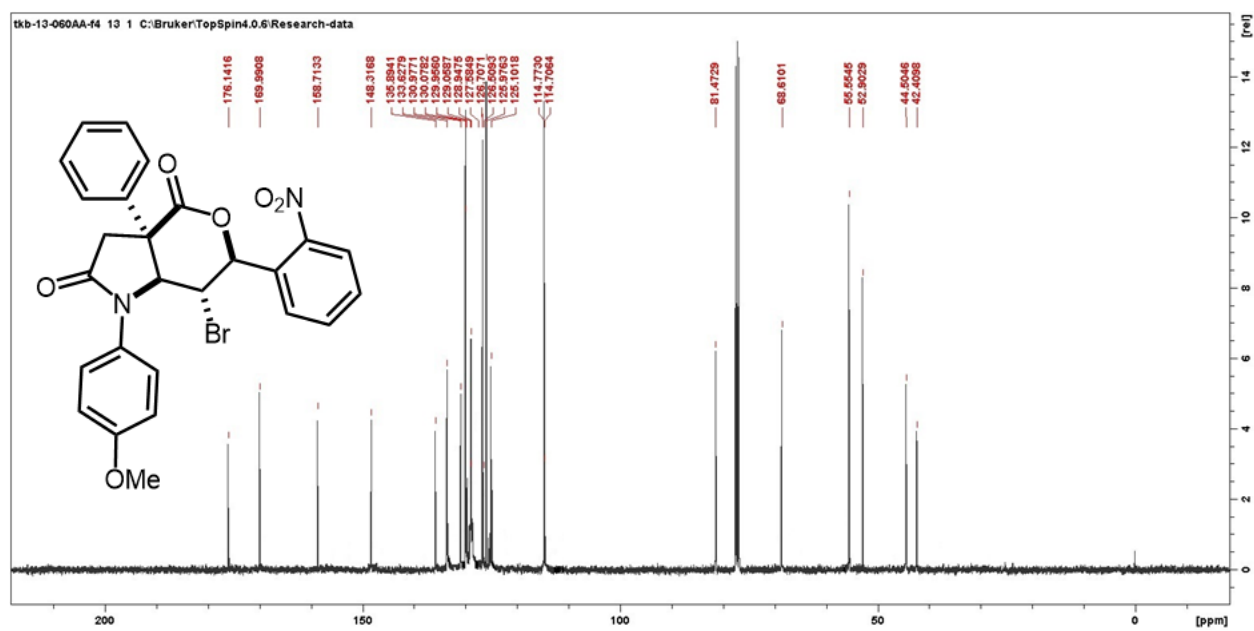

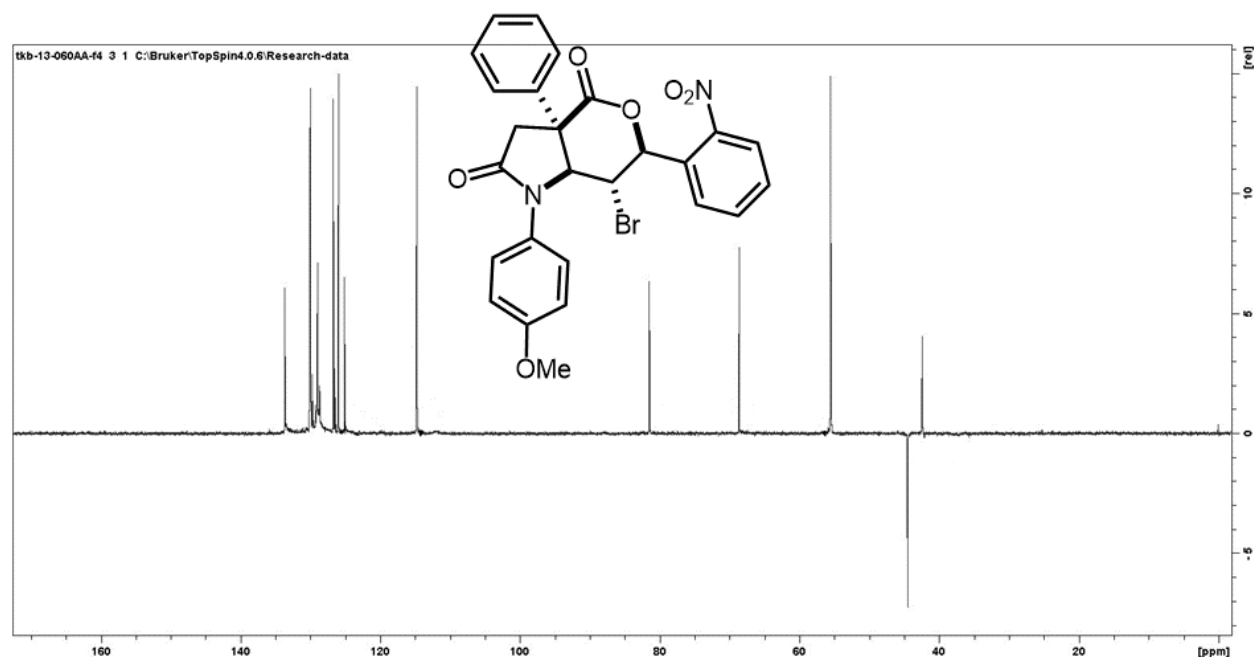

### Compound 4n

Prepared in 1 mmol scale using **General Procedure A**. Purification: Flash chromatography on silica eluting with hexane/EtOAc (80:20). Oily substance. Yield = 408.1 mg, 77%, 95:5 dr.  $^1\text{H}$  NMR (400 MHz,  $\text{CDCl}_3$ )  $\delta$  7.68 (s, 1H), 7.66 – 7.54 (m, 7H), 7.41 – 7.14 (m, 6H), 5.68 (d,  $J = 4.7$  Hz, 1H), 5.26 (d,  $J = 11.0$  Hz, 1H), 4.05 (dd,  $J = 11.0, 4.6$  Hz, 1H), 3.88 (d,  $J = 17.3$  Hz, 1H), 2.82 (d,  $J = 17.3$  Hz, 1H).  $^{13}\text{C}$  NMR (101 MHz,  $\text{CDCl}_3$ )  $\delta$  170.5, 170.3, 159.1, 136.4, 136.0, 134.7, 130.1, 129.9, 129.9, 129.2, 128.6, 127.8, 126.2, 124.3, 124.3, 122.6, 122.6, 80.6, 69.3, 53.8, 48.7, 44.1. FTIR (KBr): 3027.4, 2924.0, 1724.2, 1646.3, 1474.3, 1452.8, 1361.9, 1342.0, 1205.6, 1140.2, 1071.7, 1028.3, 996.4, 735.4. HRMS calc for  $\text{C}_{26}\text{H}_{19}\text{BrF}_3\text{NO}_3$  529.0500, found 529.0504.

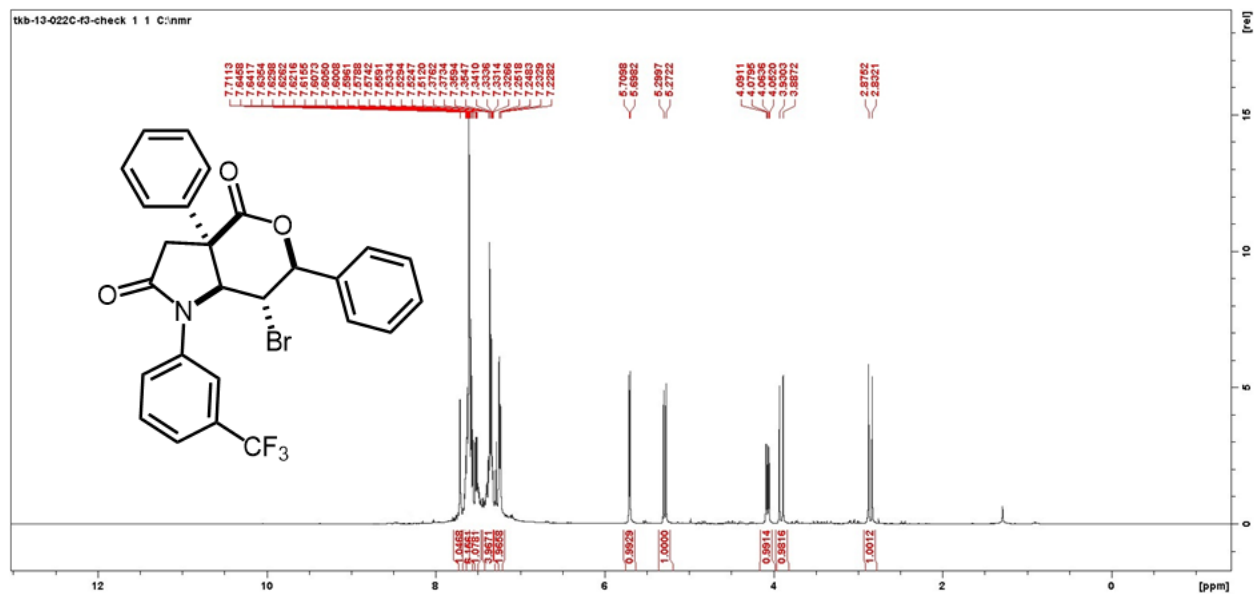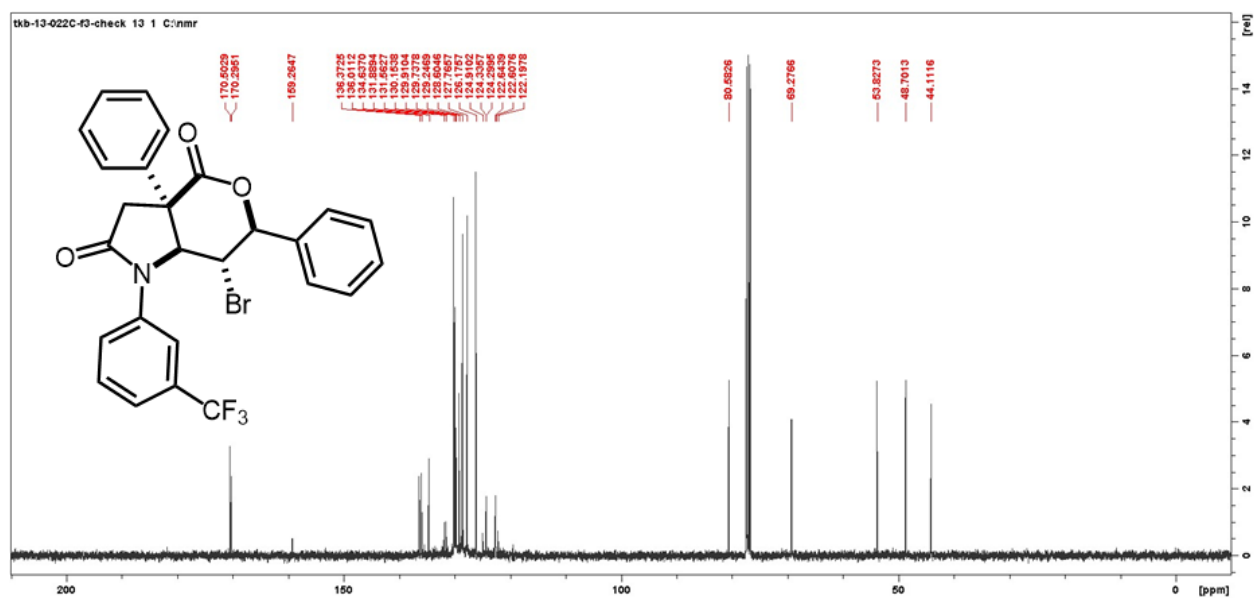

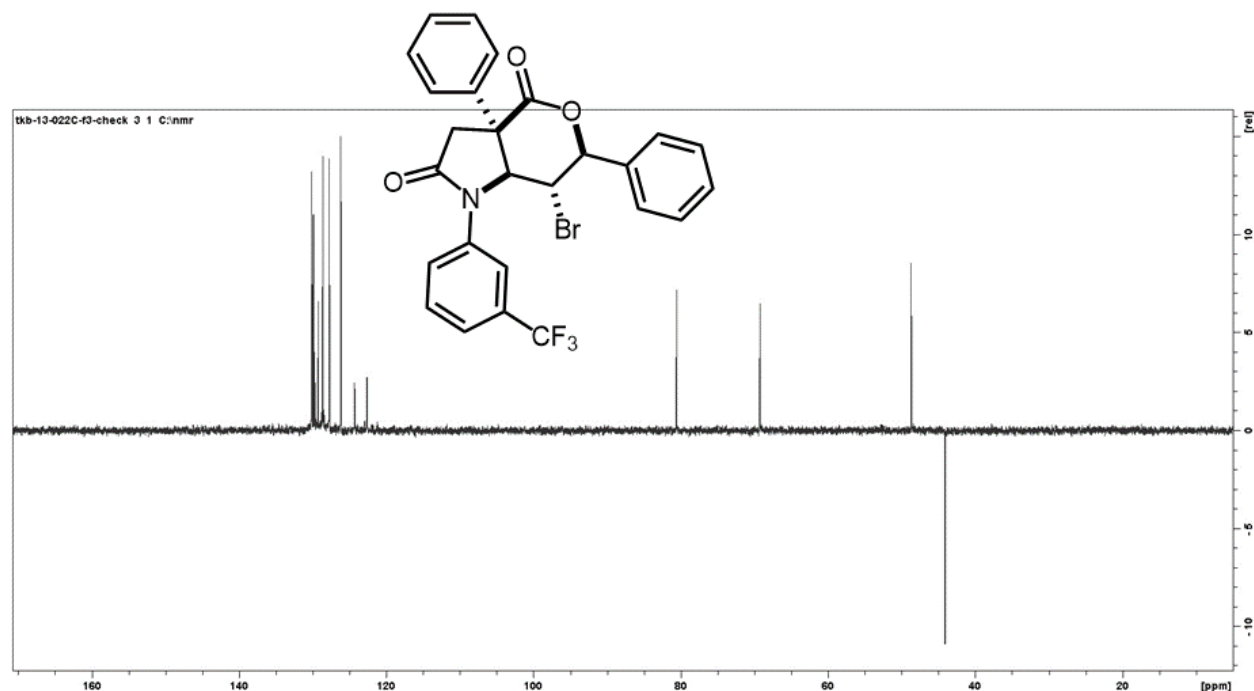

### Compound 4o

Prepared in 1 mmol scale using **General Procedure A**. Purification: Flash chromatography on silica eluting with hexane/EtOAc (70:30). Oily substance. Yield = 366.9 mg, 86%, 95:5 dr.  $^1\text{H}$  NMR (400 MHz,  $\text{CDCl}_3$ )  $\delta$  7.50 – 7.20 (m, 10H), 5.89 (ddt,  $J = 17.5, 9.8, 5.8$  Hz, 1H), 5.34 (s, 1H), 5.31 (dd,  $J = 6.3, 1.3$  Hz, 1H), 5.08 – 5.00 (m, 1H), 4.91 (s, 1H), 4.45 – 4.20 (m, 2H), 3.97 – 3.92 (m, 1H), 3.30 (d,  $J = 17.3$  Hz, 1H), 2.86 (d,  $J = 17.3$  Hz, 1H).  $^{13}\text{C}$  NMR (101 MHz,  $\text{CDCl}_3$ )  $\delta$  176.3, 171.0, 137.5, 136.1, 131.8, 129.8, 129.5, 129.1, 128.7, 128.1, 126.0, 119.0, 82.4, 68.7, 52.6, 51.8, 44.1, 44.1. FTIR (KBr): 2972.9, 2932.8, 1638.2, 1449.1, 1364.7, 1290.2, 1270.3, 1247.8, 1206.5, 1179.9, 1131.1, 1071.4, 994.4, 924.8, 881.7. HRMS calc for  $\text{C}_{22}\text{H}_{20}\text{BrNO}_3$  425.0627, found 425.0631.

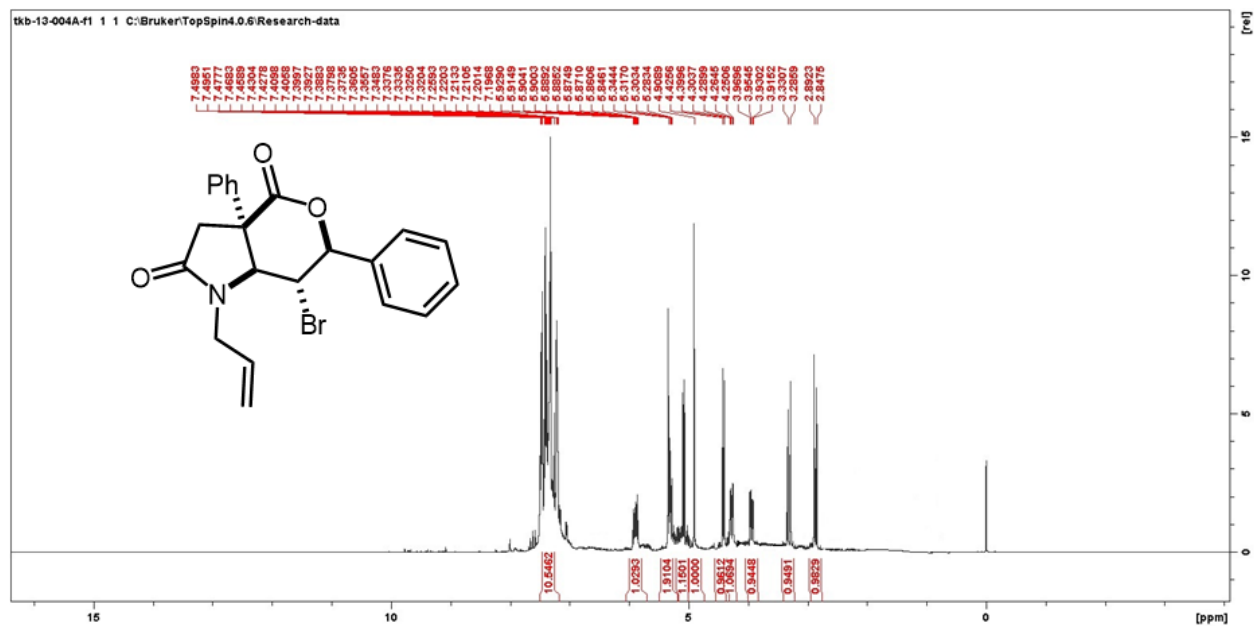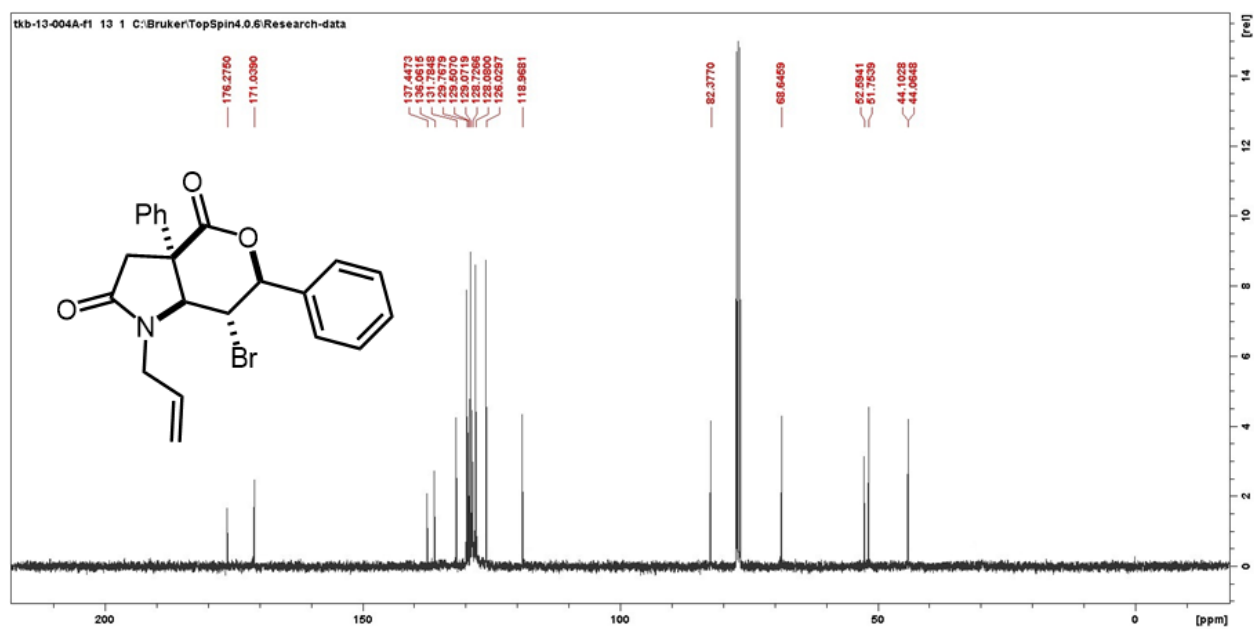

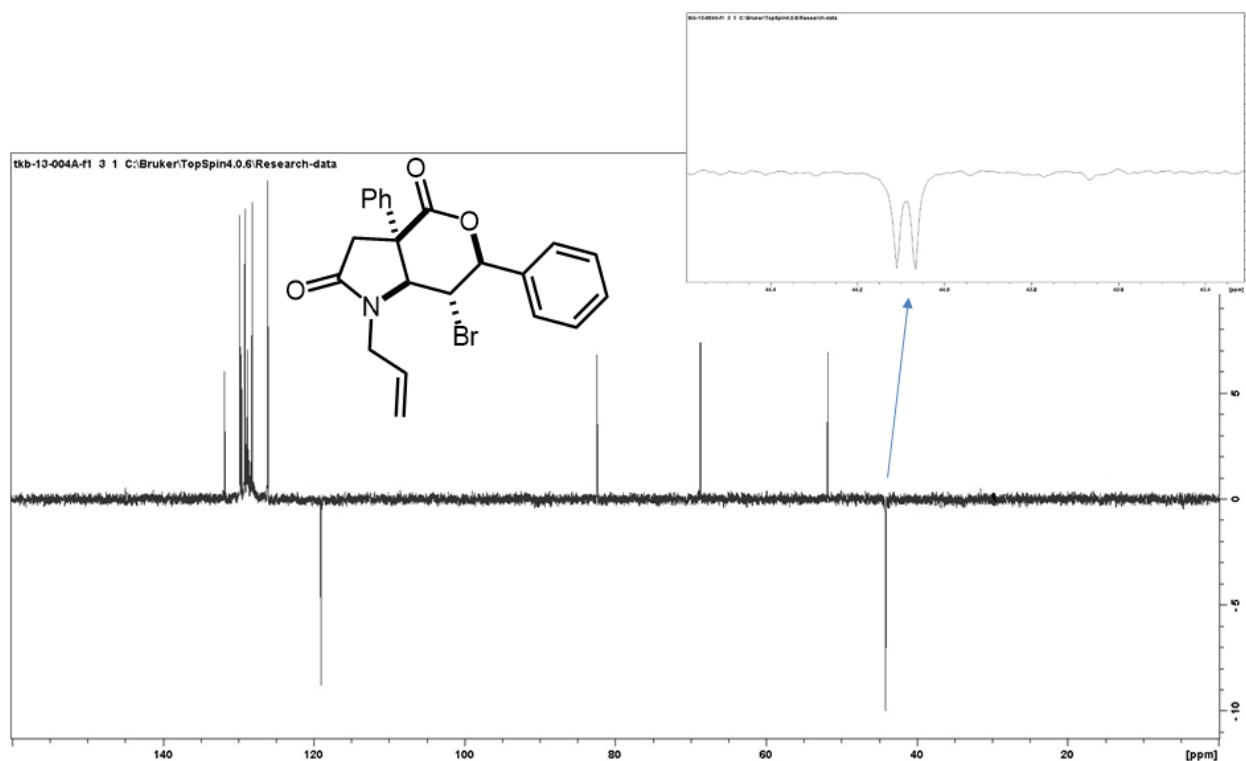

### Compound 4p

Prepared in 1 mmol scale using **General Procedure A**. Purification: Flash chromatography on silica eluting with hexane/EtOAc (70:30). Oily substance. Yield = 369.4 mg, 81%, 75:25 dr (*anti:syn*). <sup>1</sup>H NMR (400 MHz, CDCl<sub>3</sub>) δ 7.47 – 7.38 (m, 5H), 7.21 – 7.19 (m, 2H), 6.89 – 6.87 (m, 2H), 6.70 (d, 1H), 5.83 – 5.74 (m, 1H), 5.38 – 5.23 (m, 2H), 5.21 – 5.04 (m, 1H), 4.99 (d, *J* = 6.3 Hz, 1H), 4.33 – 4.28 (m, 2H), 3.79 – 3.71 (m, 4H), 2.68 (d, *J* = 17.4 Hz, 1H). <sup>13</sup>C NMR (101 MHz, CDCl<sub>3</sub>) δ 171.5, 171.4, 170.7, 169.4, 160.7, 160.4, 141.1, 138.3, 131.8, 129.9, 129.8, 129.7, 129.3, 129.2, 128.8, 127.1, 127.1, 126.1, 126.1, 126.0, 125.1, 118.8, 114.5, 114.2, 114.0, 114.0, 82.5, 80.0, 69.0, 68.7, 55.4, 55.3, 55.3, 55.3, 54.9, 53.6, 50.4, 48.0, 44.1, 43.7. FTIR (KBr): 3009.7, 2933.6, 1647.4, 1607.2, 1577.1, 1512.0, 1454.2, 1427.6, 1359.8, 1299.2, 1250.9, 1176.0, 1151.5, 1119.6, 1031.3, 990.3, 927.8, 825.4, 765.0. HRMS calc for C<sub>23</sub>H<sub>22</sub>BrNO<sub>4</sub> 455.0732, found 455.0738.



File :C:\GCMS\Beng Research\Data\TKB-13-048D-F1NMR.D  
 Operator : Beng  
 Acquired : 26 Jan 2021 12:21 using AcqMethod 180-280C-20190419.M  
 Instrument : Instrument #1  
 Sample Name:  
 Misc Info :  
 Vial Number: 1

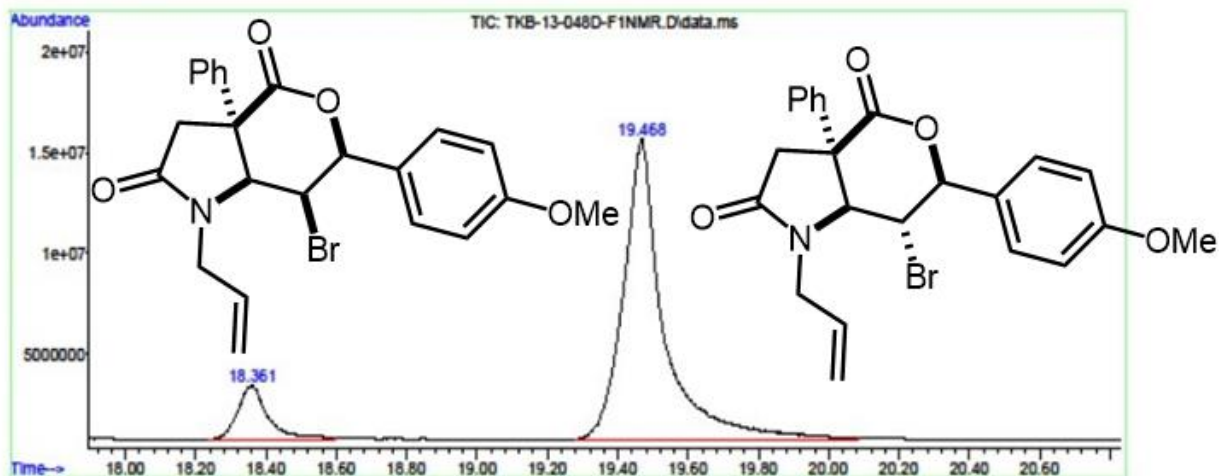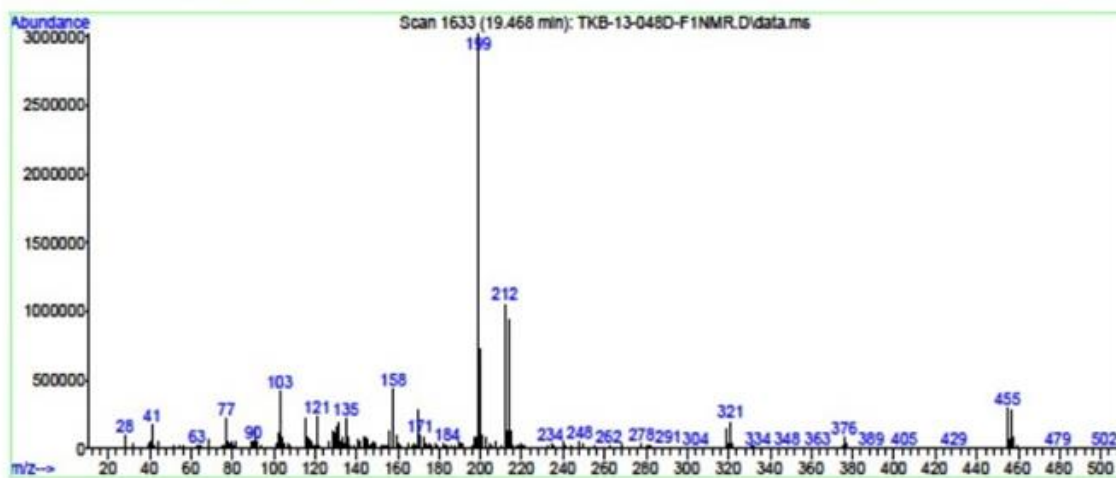

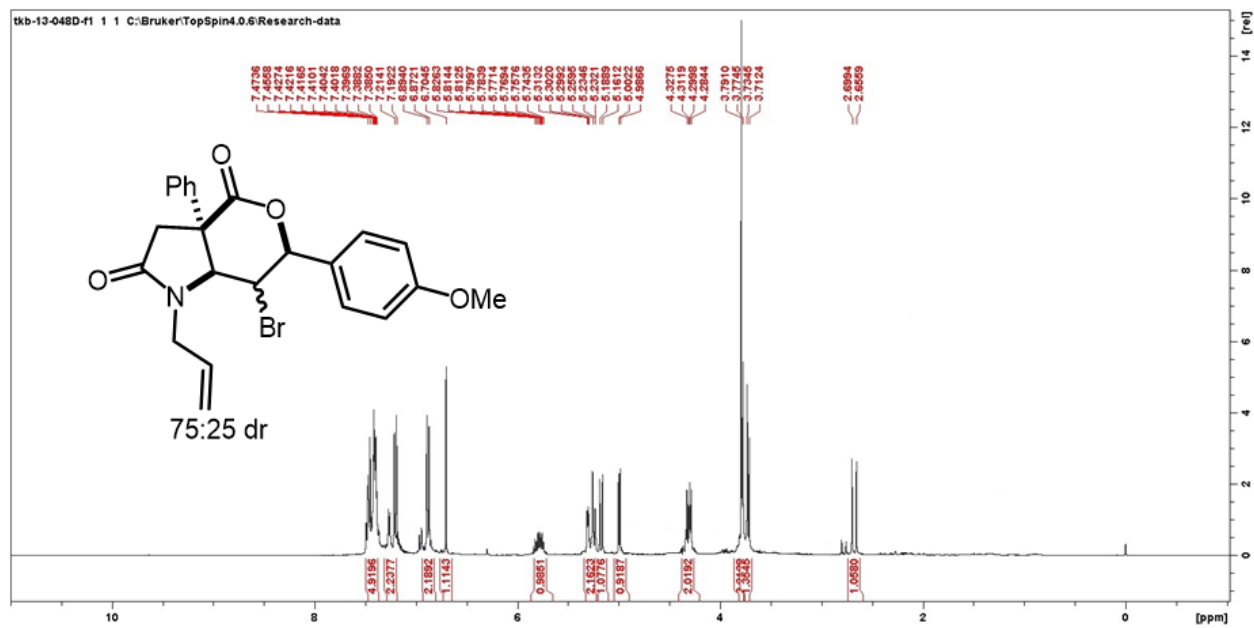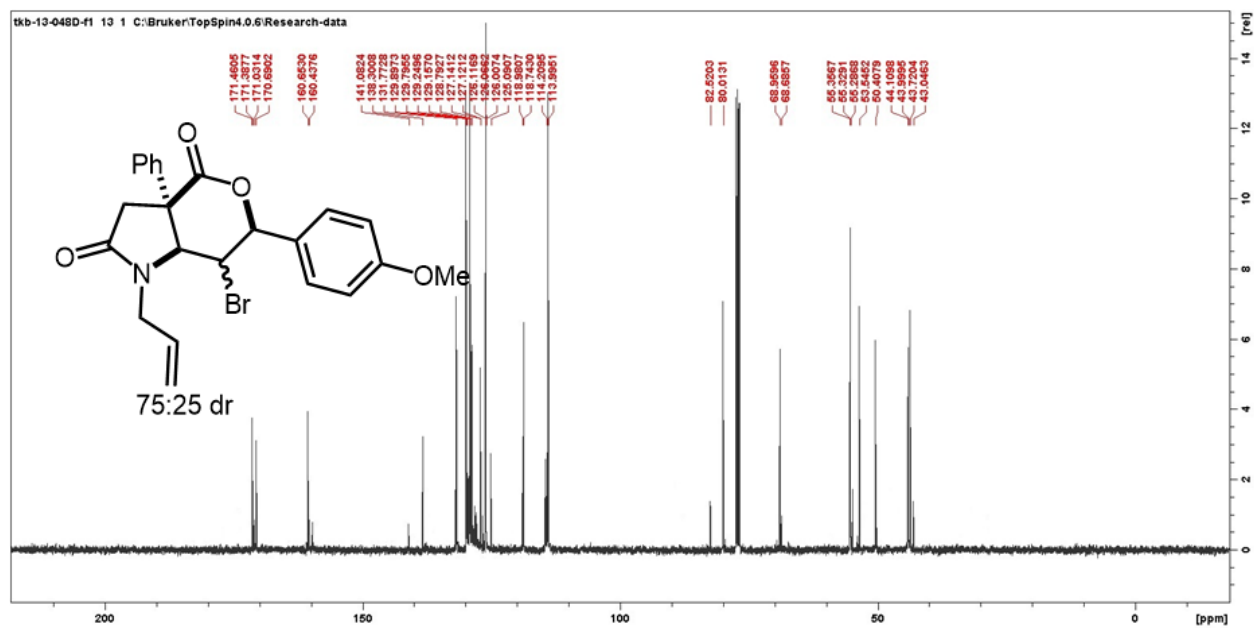

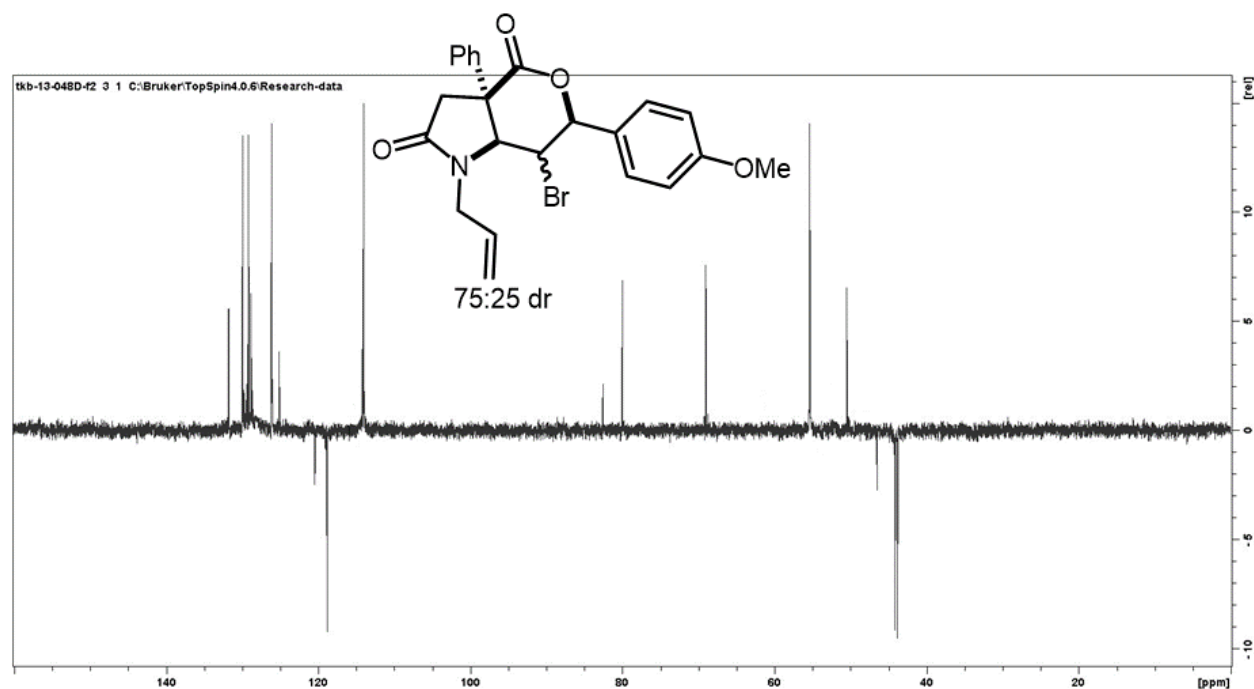

### Compound 4q

Prepared in 1 mmol scale using **General Procedure A**. Purification: Flash chromatography on silica eluting with hexane/EtOAc (75:25). Oily substance. Yield = 421.9 mg, 83%, 95:5 dr (*anti:syn*).  $^1\text{H NMR}$  (400 MHz,  $\text{CDCl}_3$ )  $\delta$  7.34 – 7.07 (m, 14H), 5.34 (s, 1H), 5.21 (d,  $J = 14.8$  Hz, 1H), 4.21 (s, 1H), 3.84 (d,  $J = 14.8$  Hz, 1H), 2.74 – 2.56 (m, 2H), 1.60 (s, 3H).  $^{13}\text{C NMR}$  (101 MHz,  $\text{CDCl}_3$ )  $\delta$  177.5, 175.8, 163.8, 163.7, 161.4, 161.3, 142.3, 131.0, 130.9, 129.7, 129.6, 129.3, 128.1, 127.9, 127.4, 124.7, 115.8, 115.6, 83.1, 74.7, 64.4, 42.1, 37.2, 18.0. FTIR (KBr): 2934.2, 1721.2, 1652.1, 1511.3, 1448.8, 1414.9, 1341.3, 1298.4, 1245.2, 1139.4, 1075.9, 1032.9, 999.4, 832.0, 734.9. HRMS calc for  $\text{C}_{27}\text{H}_{23}\text{BrFNO}_3$  507.0845, found 507.0849.

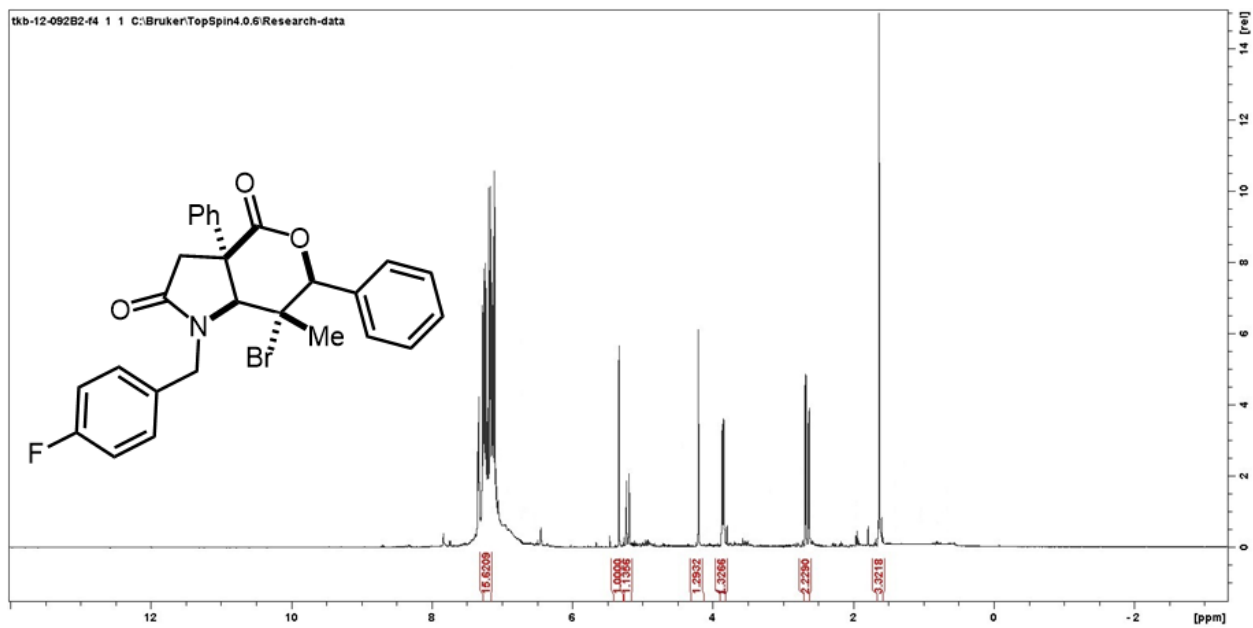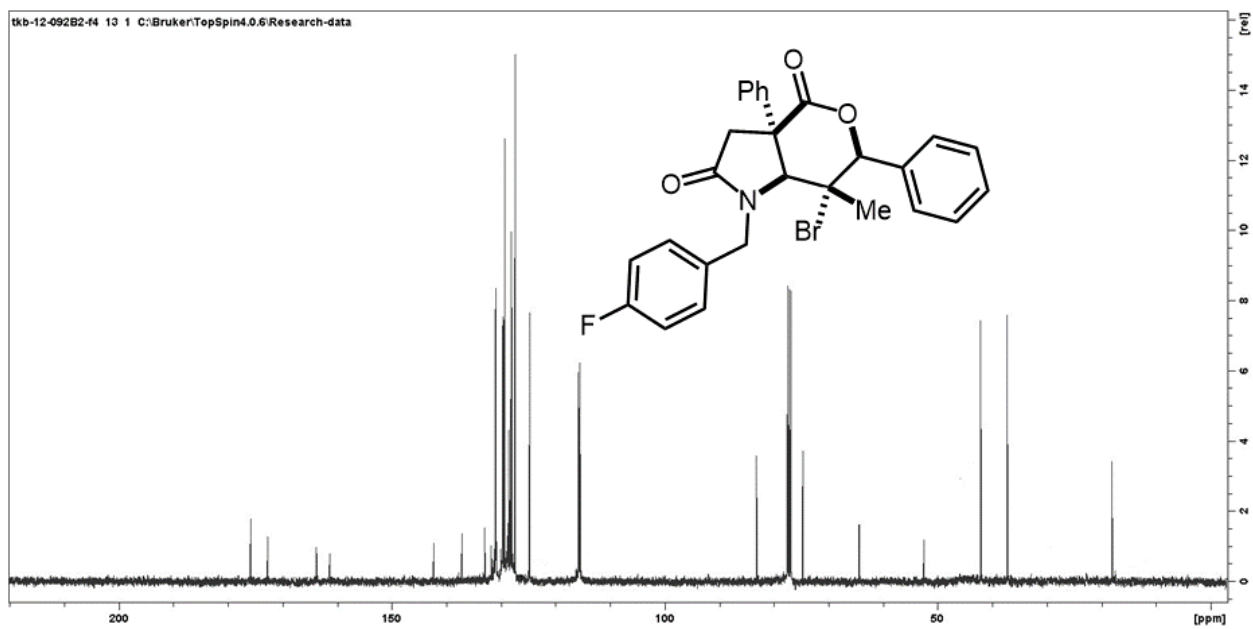

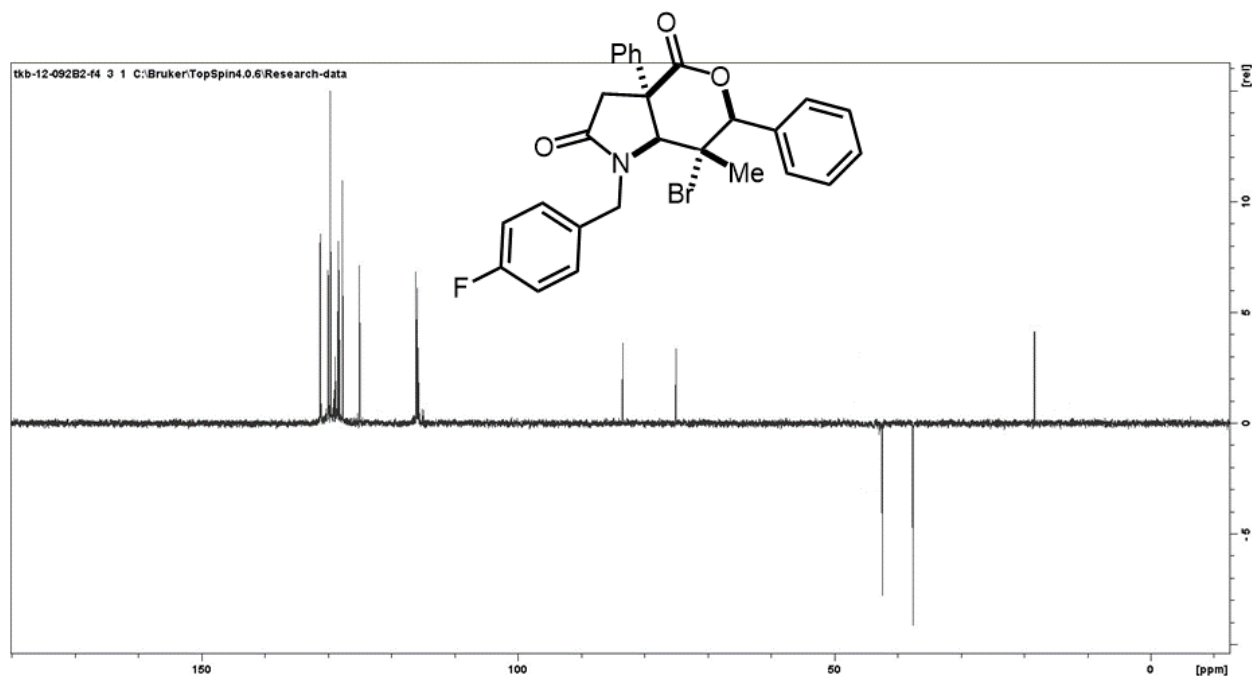<sup>19</sup>F NMR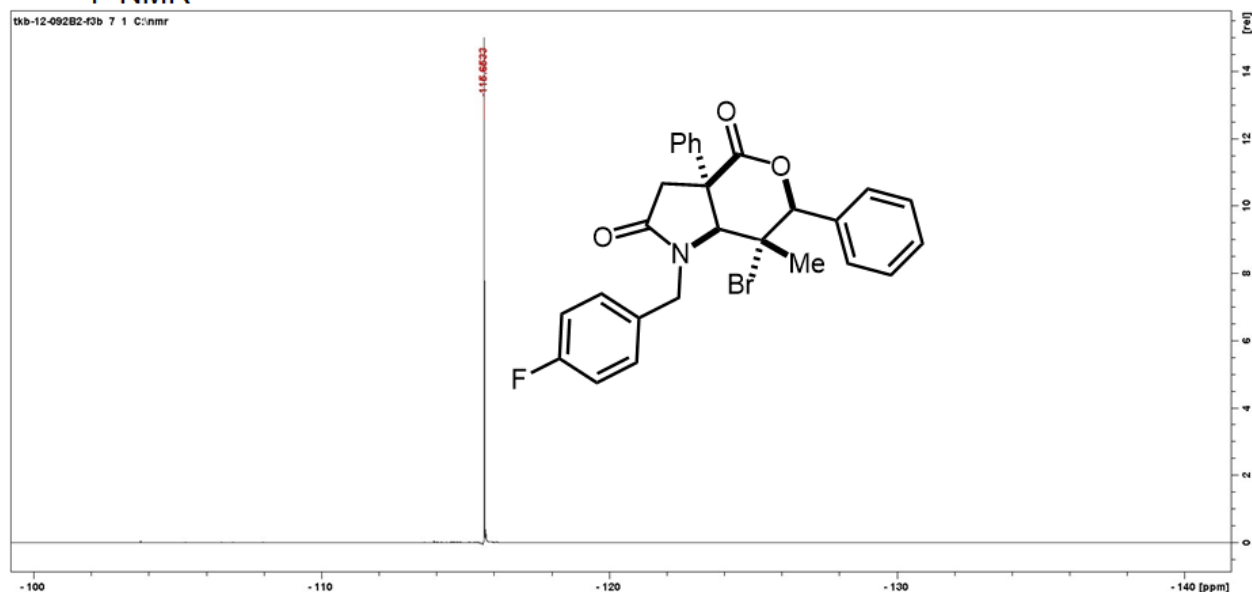**Compound 4r**

Prepared in 1 mmol scale using **General Procedure A**. Purification: Flash chromatography on silica eluting with hexane/EtOAc (60:40). Oily substance. Yield = 557.6 mg, 95%, 95:5 dr. <sup>1</sup>H NMR (400 MHz, CDCl<sub>3</sub>) δ 7.81 (d, *J* = 7.6 Hz, 2H), 7.43 – 7.30 (m, 7H), 7.17 (q, *J* = 9.3, 8.3 Hz, 2H), 7.01 (dd, *J* = 12.3, 7.8 Hz, 4H), 6.77 (d, *J* = 8.0 Hz, 2H), 6.34 (d, *J* = 7.8 Hz, 2H), 5.13 (d, *J* = 14.6 Hz, 1H), 5.06 (d, *J* = 9.8 Hz, 1H), 4.38 (d, *J* = 14.6 Hz, 1H), 4.31 (d, *J* = 9.7 Hz, 1H), 3.32

– 3.18 (m, 2H).  $^{13}\text{C}$  NMR (101 MHz,  $\text{CDCl}_3$ )  $\delta$  171.8, 171.1, 141.0, 139.6, 138.7, 133.7, 132.9, 130.1, 129.2, 129.1, 129.0, 128.7, 128.5, 128.3, 128.1, 128.1, 127.0, 126.1, 87.6, 66.1, 55.1, 53.1, 46.1, 40.7. FTIR (KBr): 2971.4, 2923.9, 1644.4, 1491.4, 1446.8, 1429.3, 1391.6, 1362.4, 1318.9, 1292.6, 1268.8, 1223.0, 1199.5, 1151.3, 993.1, 905.3, 744.2. HRMS calc for  $\text{C}_{32}\text{H}_{25}\text{BrClNO}_3$  585.0706, found 585.0712.

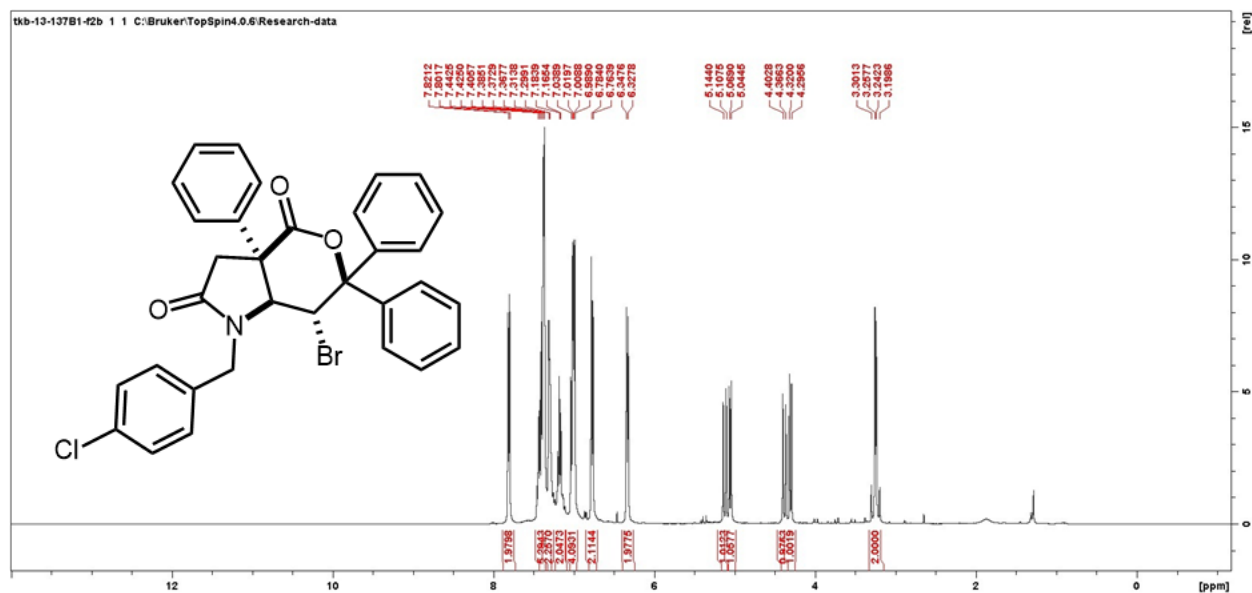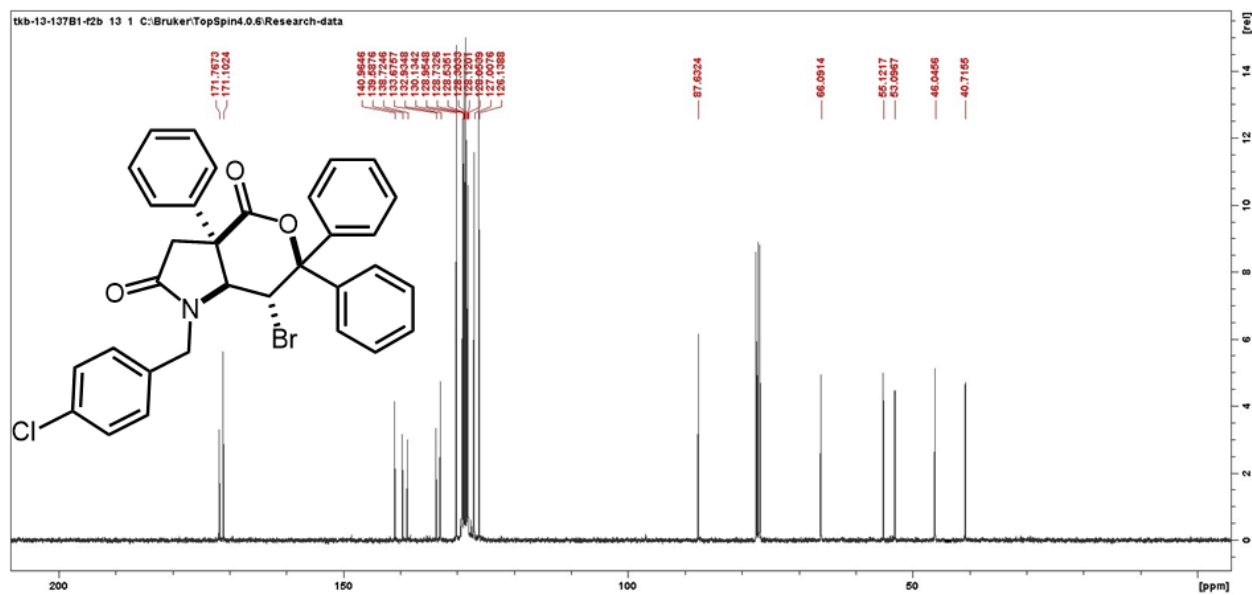

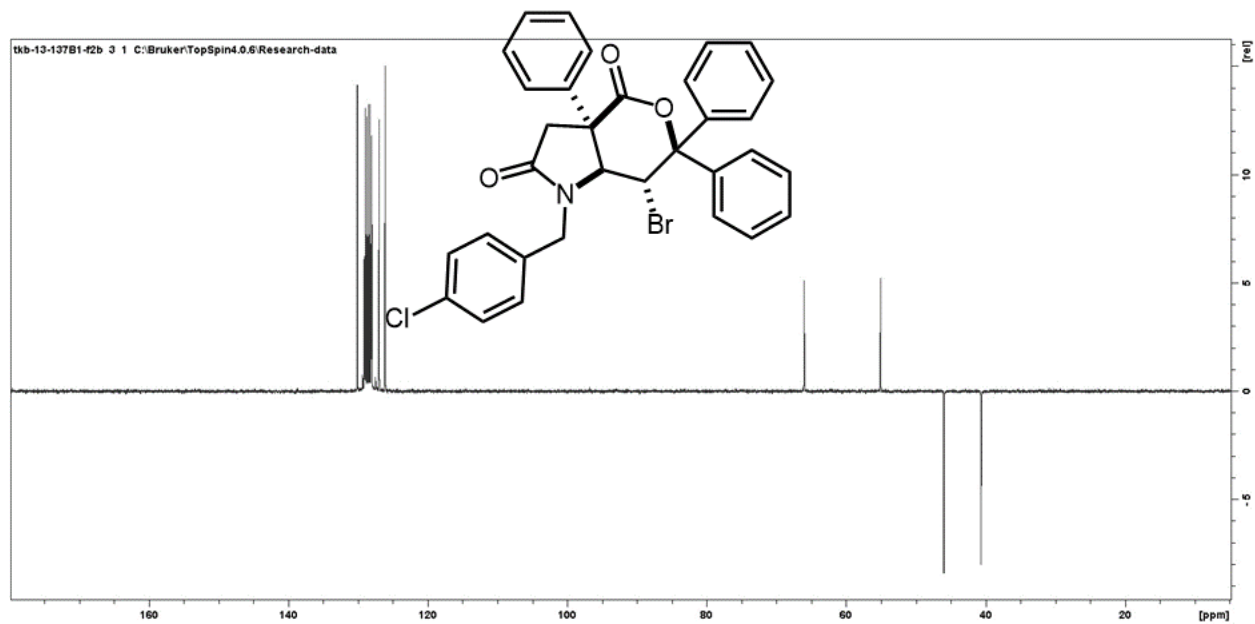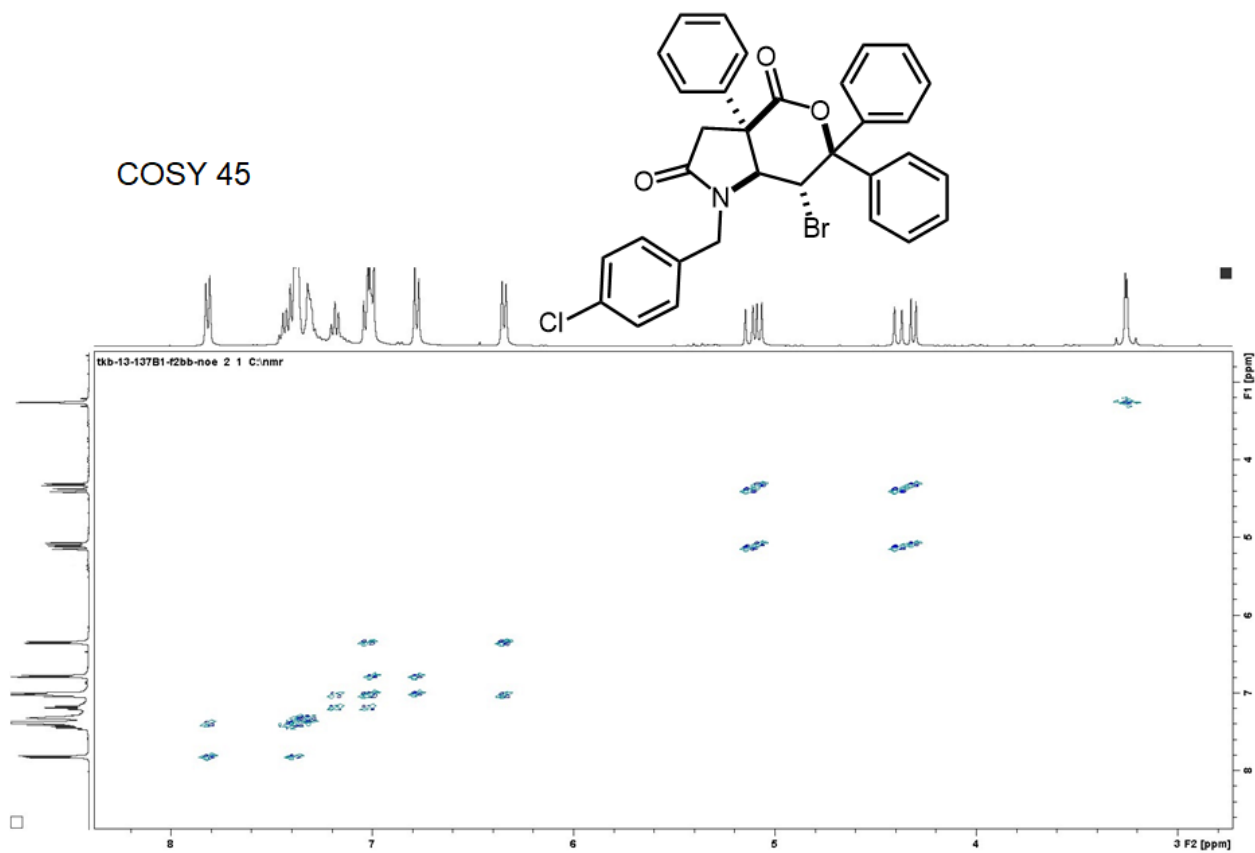

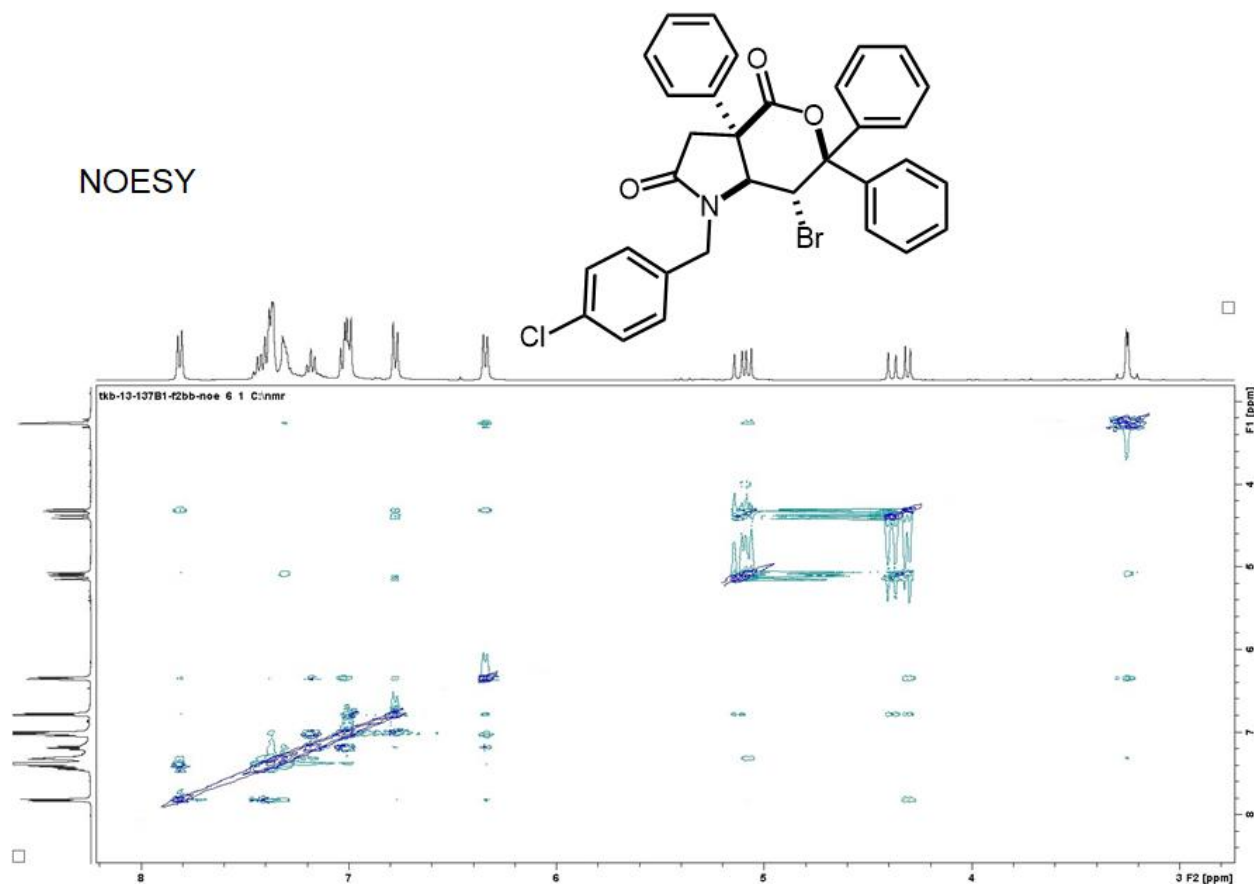

### Compound 4s

Prepared in 1 mmol scale using **General Procedure A**. Purification: Flash chromatography on silica eluting with hexane/EtOAc (50:50). Oily substance. Yield = 508.3 mg, 92%, 95:5 dr.  $^1\text{H}$  NMR (400 MHz,  $\text{CDCl}_3$ )  $\delta$  7.61 (d,  $J = 7.7$  Hz, 2H), 7.34 – 7.18 (m, 17H), 5.34 (d,  $J = 4.1$  Hz, 1H), 5.29 – 5.20 (m, 1H), 3.15 (d,  $J = 17.2$  Hz, 1H), 2.88 (d,  $J = 17.2$  Hz, 1H), 2.37 (s, 3H).  $^{13}\text{C}$  NMR (101 MHz,  $\text{CDCl}_3$ )  $\delta$  171.0, 169.2, 142.6, 140.3, 136.2, 134.4, 130.0, 129.9, 129.3, 129.1, 129.1, 128.9, 128.7, 128.2, 128.1, 127.4, 126.3, 126.1, 125.8, 125.4, 121.9, 87.8, 76.8, 71.7, 52.3, 46.0, 42.5, 21.0. FTIR (KBr): 3029.4, 2924.0, 1724.9, 1646.3, 1474.3, 1452.8, 1361.9, 1342.0, 1205.6, 1140.2, 1071.7, 1028.3, 996.4, 775.4. HRMS calc for  $\text{C}_{32}\text{H}_{26}\text{BrNO}_3$  551.1096, found 551.1090.





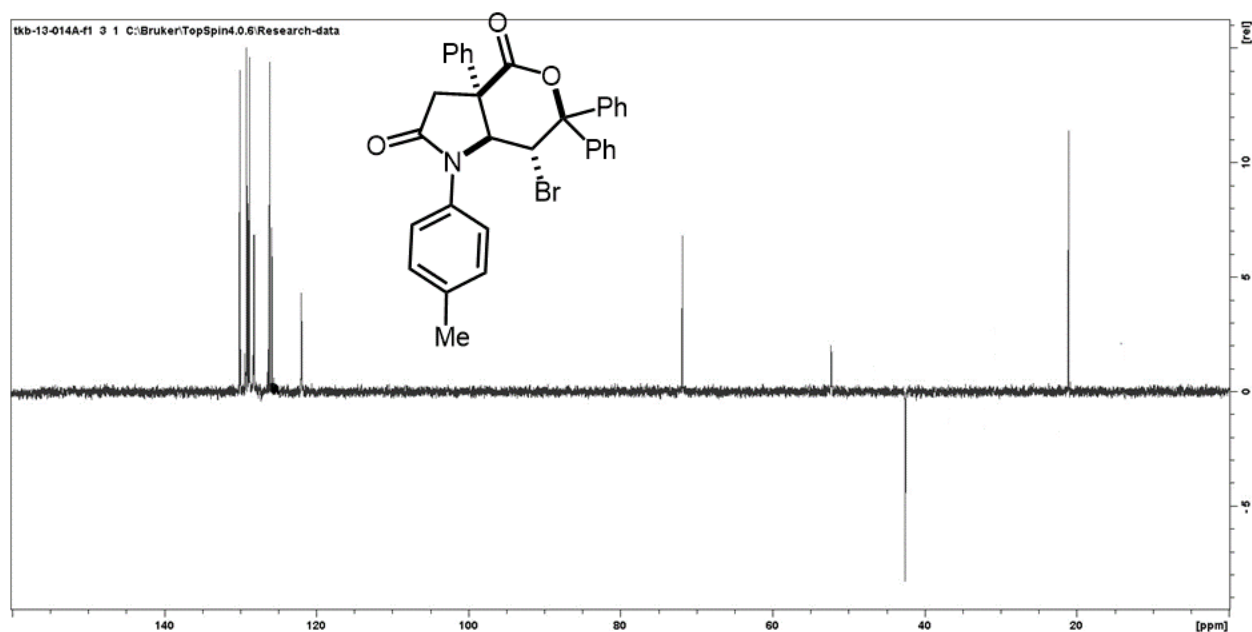

### Compound 4t

Prepared in 1 mmol scale using **General Procedure B**. Purification: Flash chromatography on silica eluting with hexane/EtOAc (75:25). Oily substance. Yield = 492.5 mg, 89%, 95:5 dr.  $^1\text{H}$  NMR (400 MHz,  $\text{CDCl}_3$ )  $\delta$  7.57 – 7.44 (m, 5H), 7.27 – 7.23 (m, 4H), 7.09 (d,  $J$  = 8.4 Hz, 2H), 6.80 (d,  $J$  = 8.4 Hz, 2H), 5.67 (d,  $J$  = 4.8 Hz, 1H), 5.24 (d,  $J$  = 11.5 Hz, 1H), 4.19 (dd,  $J$  = 11.5, 4.8 Hz, 1H), 3.81 (d,  $J$  = 17.0 Hz, 1H), 3.74 (s, 3H), 2.74 (d,  $J$  = 17.0 Hz, 1H), 2.35 (s, 3H).  $^{13}\text{C}$  NMR (101 MHz,  $\text{CDCl}_3$ )  $\delta$  171.0, 170.8, 160.6, 138.0, 136.8, 132.8, 130.1, 130.0, 129.2, 129.0, 128.1, 126.9, 126.4, 113.9, 81.8, 70.6, 55.3, 54.7, 44.3, 26.9, 21.2. FTIR (KBr): 2944.8, 1642.2, 1494.9, 1448.8, 1427.0, 1393.4, 1361.6, 1328.7, 1289.7, 1223.6, 1198.9, 1130.1, 1074.1, 1030.4, 988.5, 966.1, 925.5, 741.8, 673.4. HRMS calc for  $\text{C}_{27}\text{H}_{24}\text{INO}_4$  553.0750, found 553.0756.

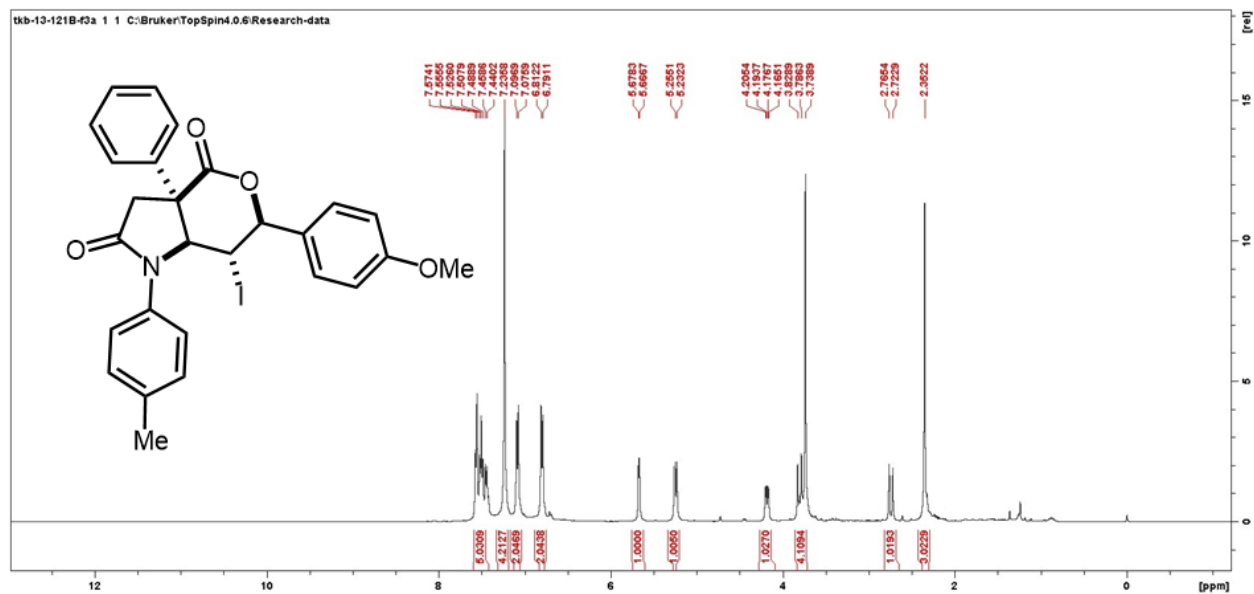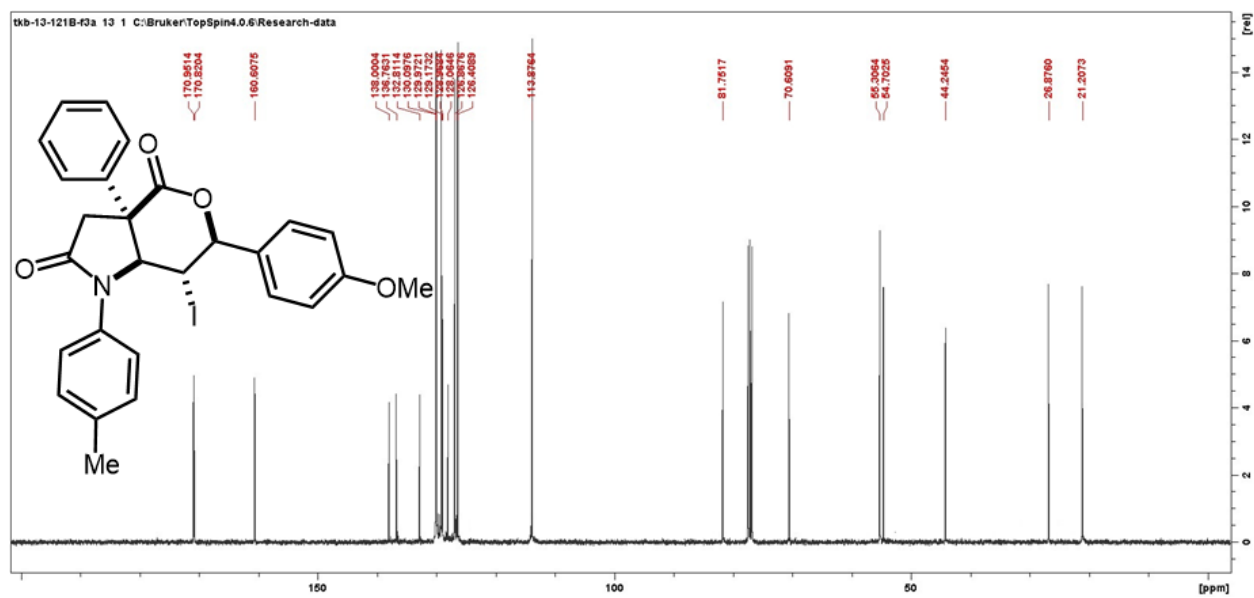

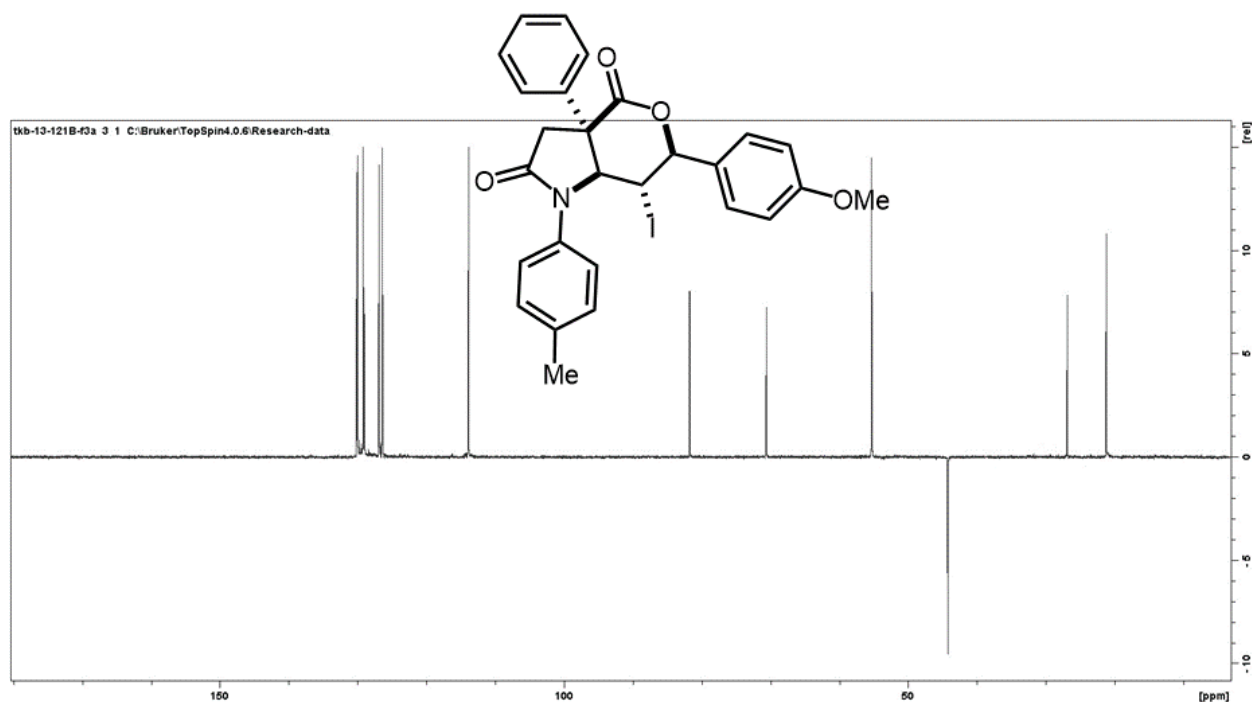

### Compound 4u

Prepared in 1 mmol scale using **General Procedure B**. Purification: Flash chromatography on silica eluting with hexane/EtOAc (75:25). Oily substance. Yield = 481.5 mg, 92%, 95:5 dr.

FTIR (KBr): 3039.4, 2904.0, 1724.9, 1646.3, 1474.3, 1452.8, 1361.9, 1342.0, 1205.6, 1140.2, 1071.7, 986.4, 765.4. HRMS calc for  $C_{26}H_{22}INO_3$  523.0644, found 523.0649.

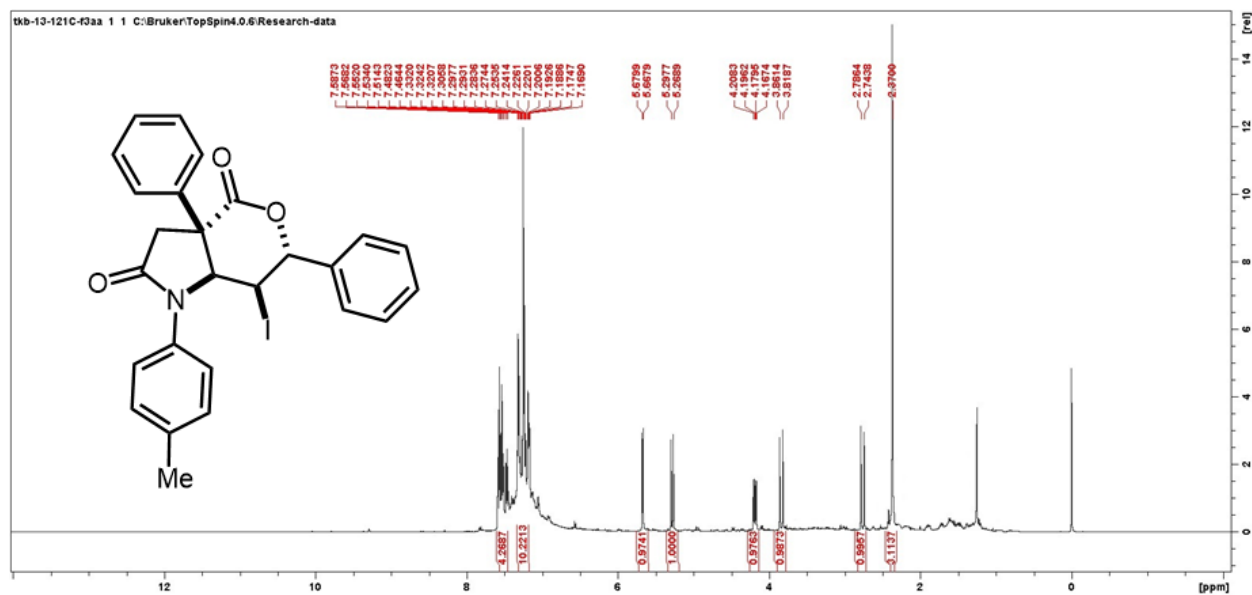

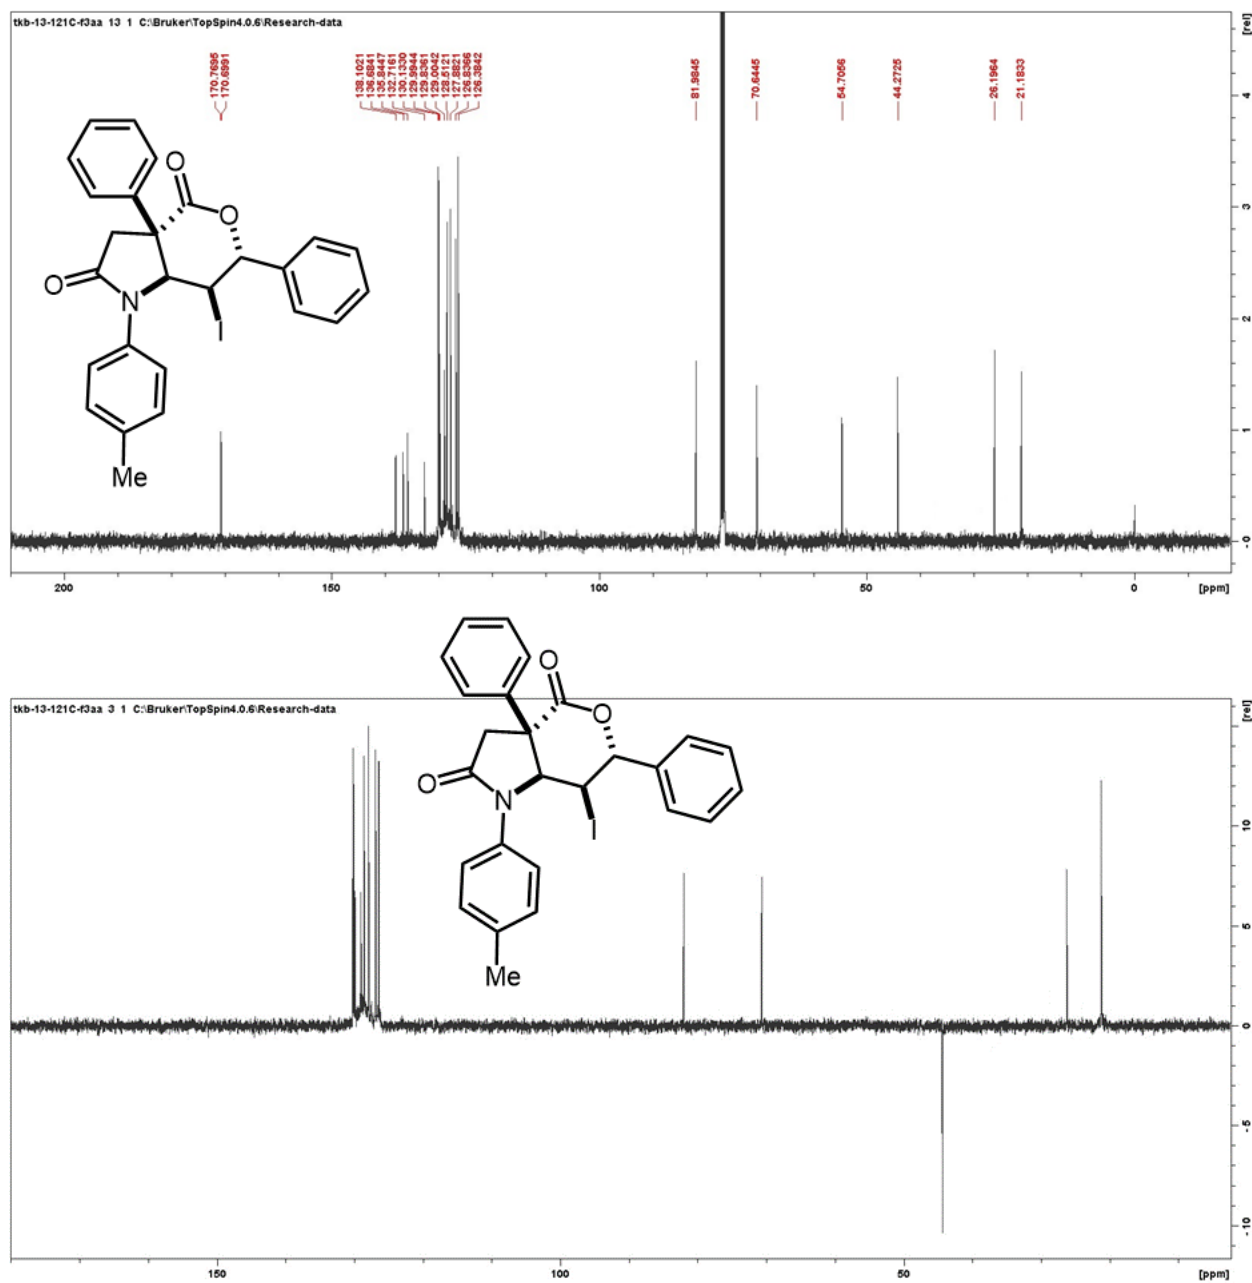

### Compound 4v

Prepared in 1 mmol scale using **General Procedure B**. Purification: Flash chromatography on silica eluting with hexane/EtOAc (75:25). Oily substance. Yield = 488.2 mg, 94%, 95:5 dr.  $^1\text{H}$  NMR (400 MHz,  $\text{CDCl}_3$ )  $\delta$  7.41 – 7.30 (m, 7H), 6.93 (d,  $J = 7.2$  Hz, 2H), 5.65 (d,  $J = 9.6$  Hz, 1H), 4.68 (t,  $J = 9.2$  Hz, 1H), 4.48 (d,  $J = 8.8$  Hz, 1H), 3.80 (s, 3H), 3.13 (br. s, 2H), 1.30 (s, 9H).  $^{13}\text{C}$  NMR (101 MHz,  $\text{CDCl}_3$ )  $\delta$  172.6, 171.2, 160.5, 139.8, 129.7, 129.1, 128.6, 128.5, 126.7, 114.1, 84.17, 72.47, 56.29, 55.36, 53.94, 41.06, 32.17, 28.18. FTIR (KBr): 3070.2, 2934.6, 2912.8,

2836.5, 1721.4, 1631.8, 1510.6, 1395.7, 1247.4, 1031.3, 820.5, 698.2. HRMS calc for C<sub>24</sub>H<sub>26</sub>INO<sub>4</sub> 519.0907, found 519.0911.

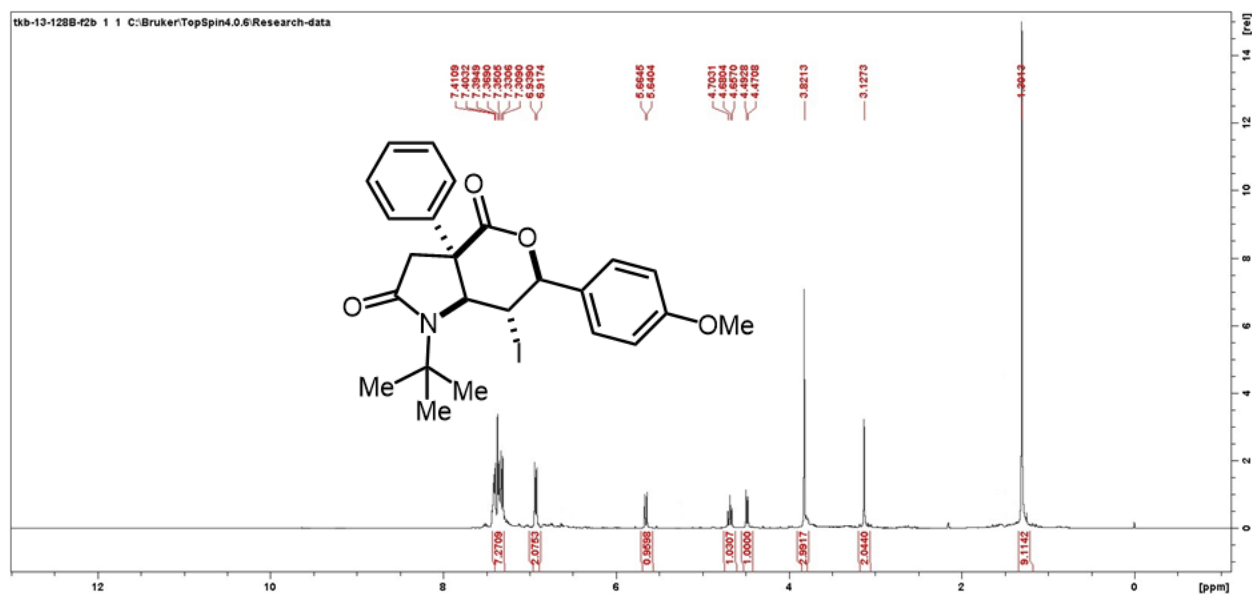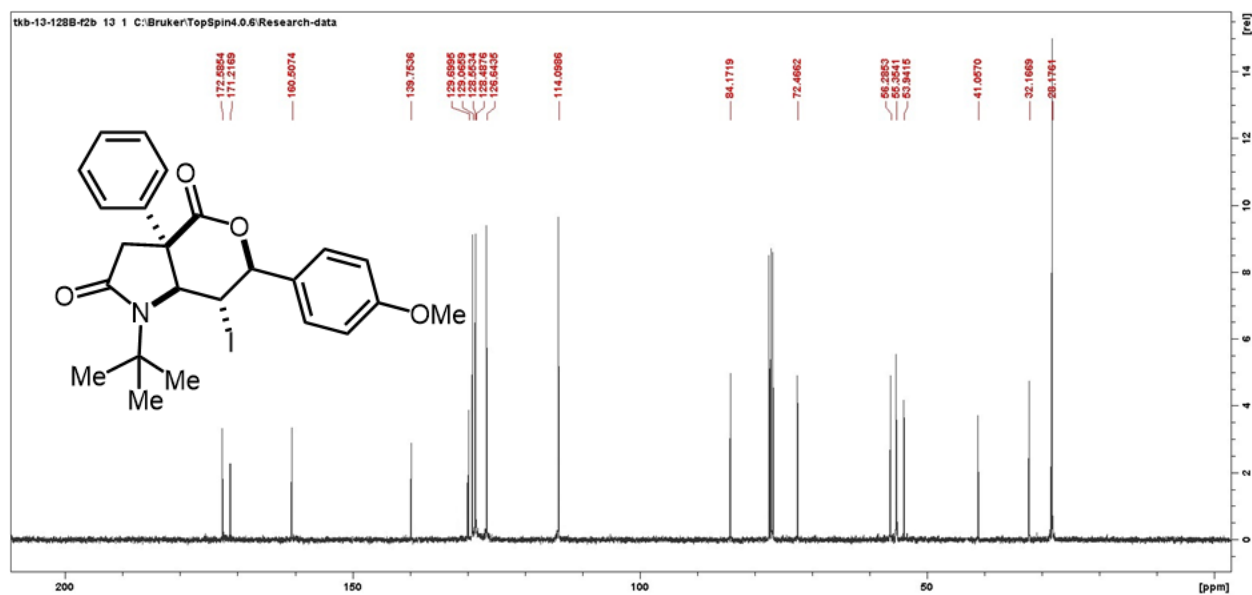

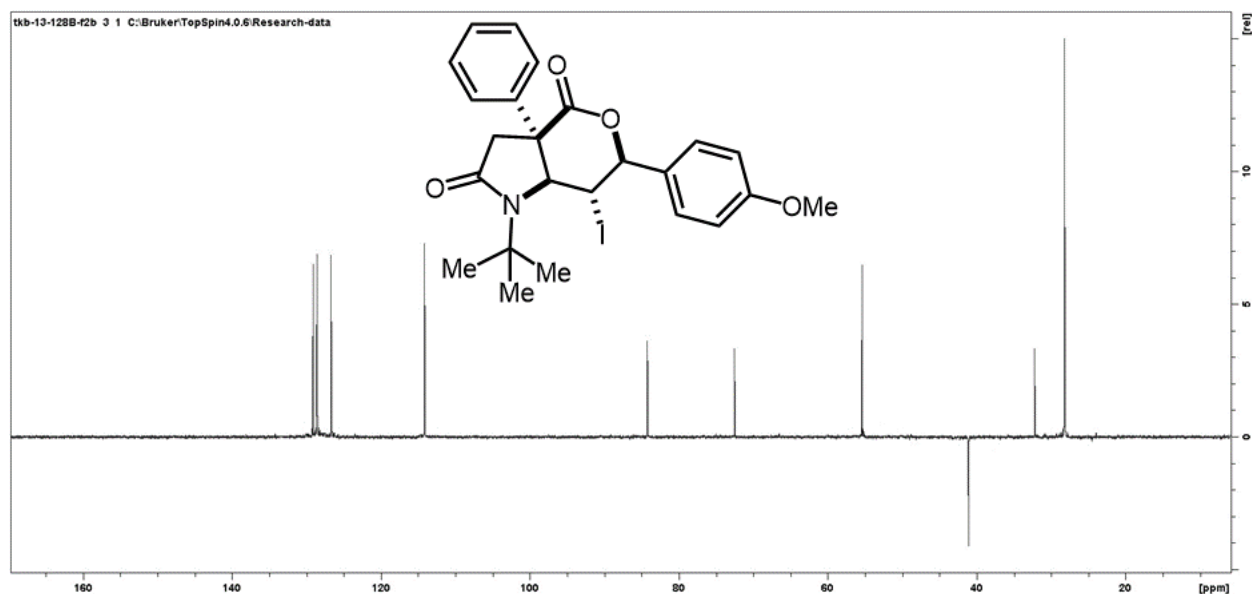

### Compound 4w

Prepared in 1 mmol scale using **General Procedure B**. Purification: Flash chromatography on silica eluting with hexane/EtOAc (75:25). Oily substance. Yield = 442.6 mg, 88%, 95:5 dr.

$^1\text{H}$  NMR (400 MHz,  $\text{CDCl}_3$ )  $\delta$  7.48 – 7.42 (m, 5H), 7.14 (dd,  $J = 8.7, 6.7$  Hz, 2H), 6.87 (d,  $J = 8.4$  Hz, 2H), 5.83 (ddt,  $J = 16.3, 10.7, 5.6$  Hz, 1H), 5.34 – 5.21 (m, 4H), 4.40 (dd,  $J = 11.6, 5.9$  Hz, 1H), 4.27 (dd,  $J = 16.0, 5.4$  Hz, 1H), 4.18 (d,  $J = 5.8$  Hz, 1H), 4.13 (dd,  $J = 14.6, 5.9$  Hz, 1H), 3.79 (s, 3H), 3.89 – 3.75 (m, 1H), 2.59 (d,  $J = 17.2$  Hz, 3H).  $^{13}\text{C}$  NMR (101 MHz,  $\text{CDCl}_3$ )  $\delta$  171.6, 170.8, 160.7, 137.5, 132.1, 129.9, 129.1, 128.8, 128.3, 126.2, 118.4, 113.9, 81.2, 69.7, 55.3, 54.4, 44.0, 43.6, 28.2. FTIR (KBr): 2990.1, 2934.1, 2910.4, 2836.5, 1721.4, 1631.8, 1510.6, 1395.7, 1247.4, 1031.3, 833.5, 688.9. HRMS calc for  $\text{C}_{23}\text{H}_{22}\text{INO}_4$  503.0594, found 503.0599.

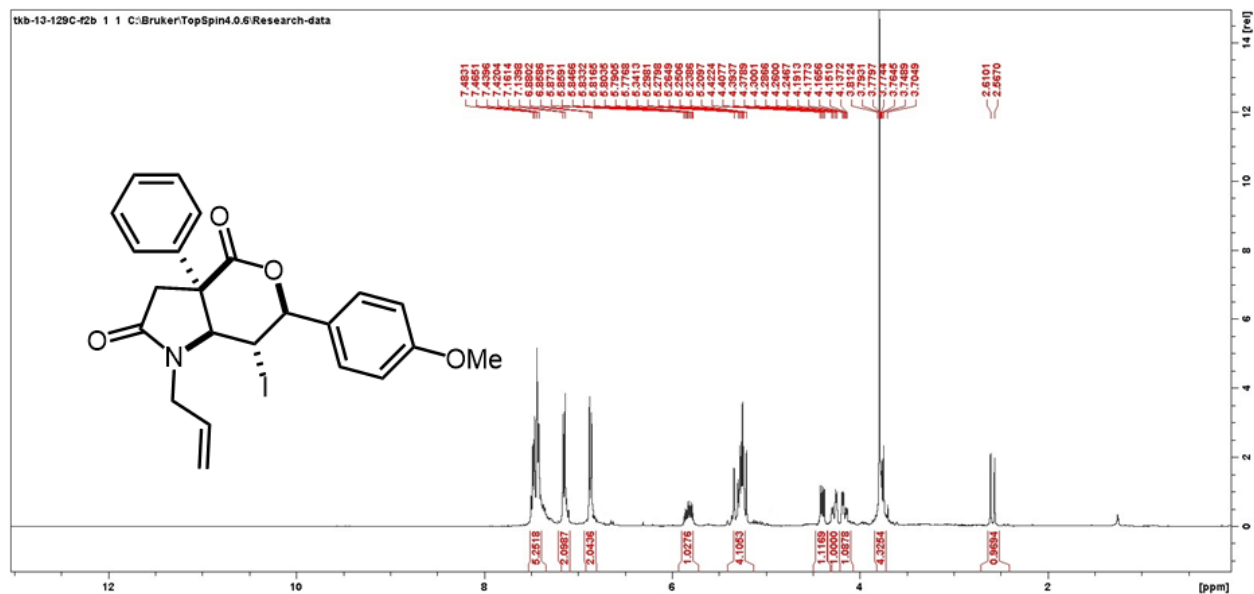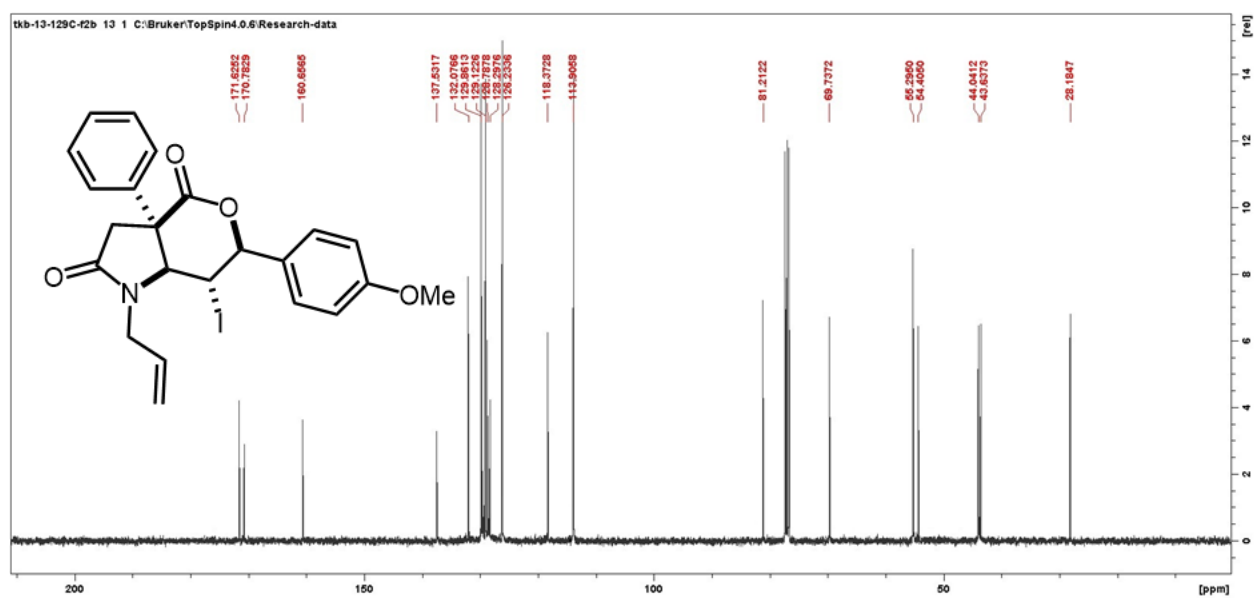



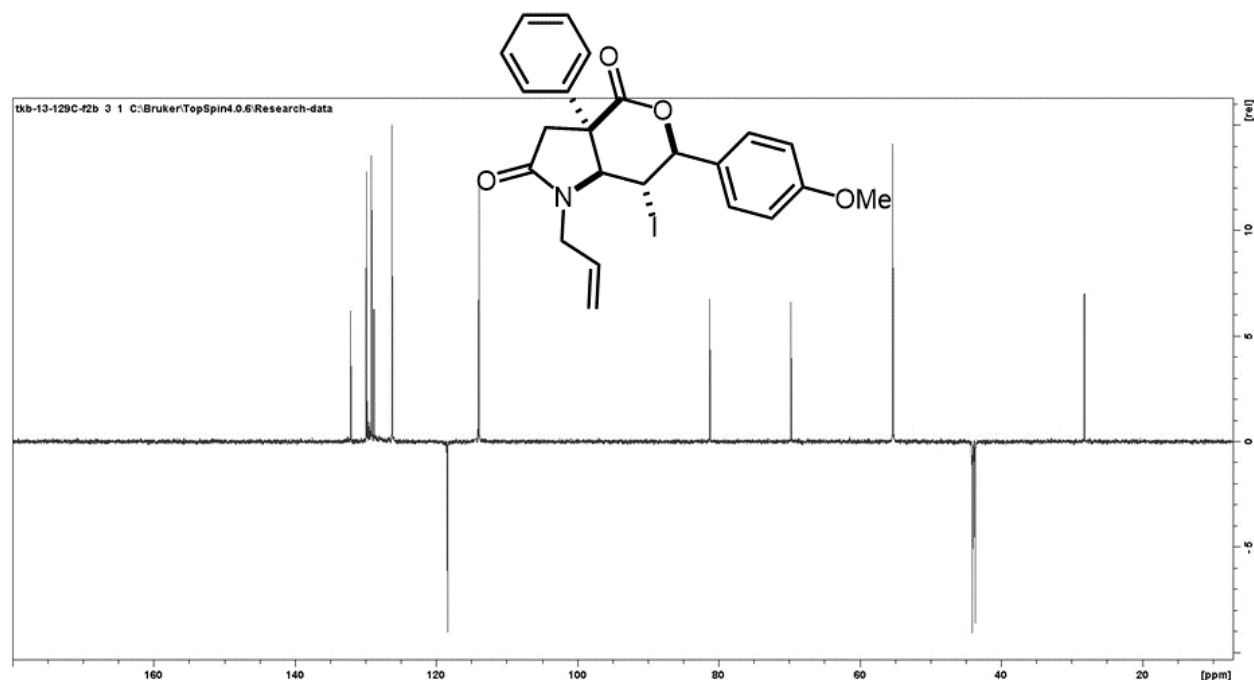

### Compound 4x

Prepared in 1 mmol scale using **General Procedure B**. Purification: Flash chromatography on silica eluting with hexane/EtOAc (75:25). Oily substance. Yield = 471.6 mg, 96%, 95:5 dr.

$^1\text{H}$  NMR (400 MHz,  $\text{CDCl}_3$ )  $\delta$  7.50 – 7.43 (m, 5H), 7.19 – 7.16 (m, 2H), 6.99 – 6.95 (m, 2H), 5.97 (ddt,  $J = 16.2, 10.8, 5.7$  Hz, 1H), 5.43 – 5.22 (m, 3H), 4.96 (s, 1H), 4.51 (d,  $J = 11.0$  Hz, 1H), 4.32 (dd,  $J = 15.8, 5.5$  Hz, 1H), 4.11 (dd,  $J = 15.9, 5.9$  Hz, 1H), 3.32 (d,  $J = 17.8$  Hz, 1H), 2.85 (d,  $J = 17.8$  Hz, 1H).  $^{13}\text{C}$  NMR (101 MHz,  $\text{CDCl}_3$ )  $\delta$  176.3, 171.1, 163.8, 161.3, 137.2, 134.1, 134.1, 132.1, 129.8, 129.8, 129.7, 128.8, 126.0, 118.9, 116.2, 116.0, 83.1, 69.7, 53.1, 44.2, 43.9, 29.2. FTIR (KBr): 3030.0, 2804.3, 1724.9, 1646.3, 1474.3, 1452.8, 1361.9, 1342.0, 1205.6, 1140.2, 1077.7, 996.4, 765.8. HRMS calc for  $\text{C}_{22}\text{H}_{19}\text{FINO}_3$  491.0394, found 491.0398.

<sup>19</sup>F NMR

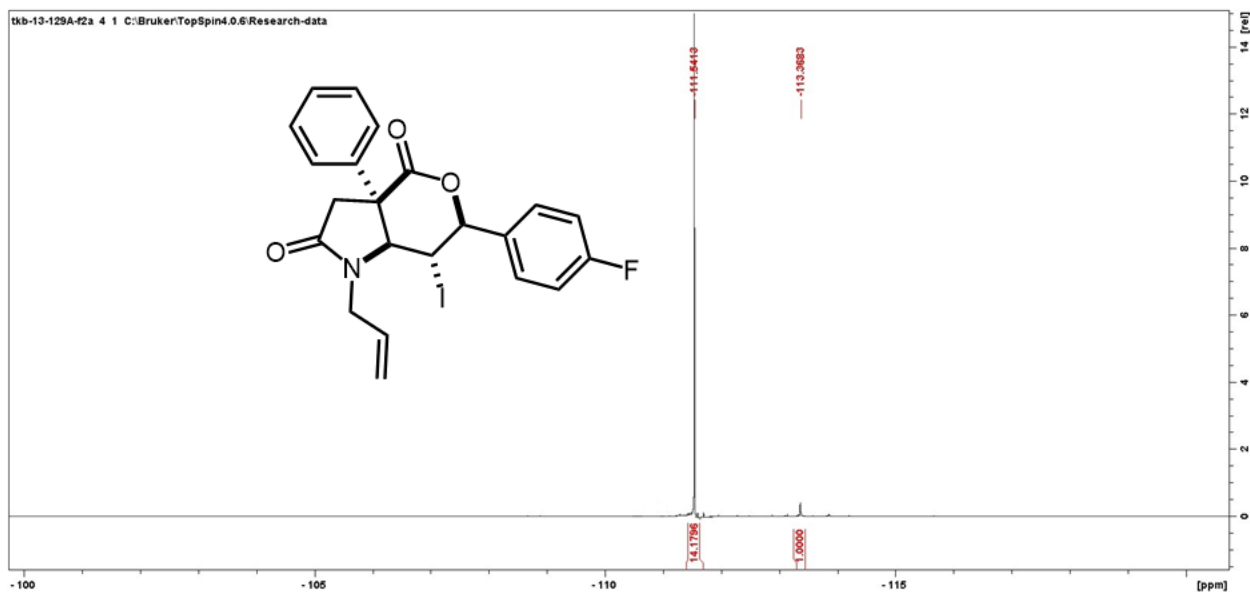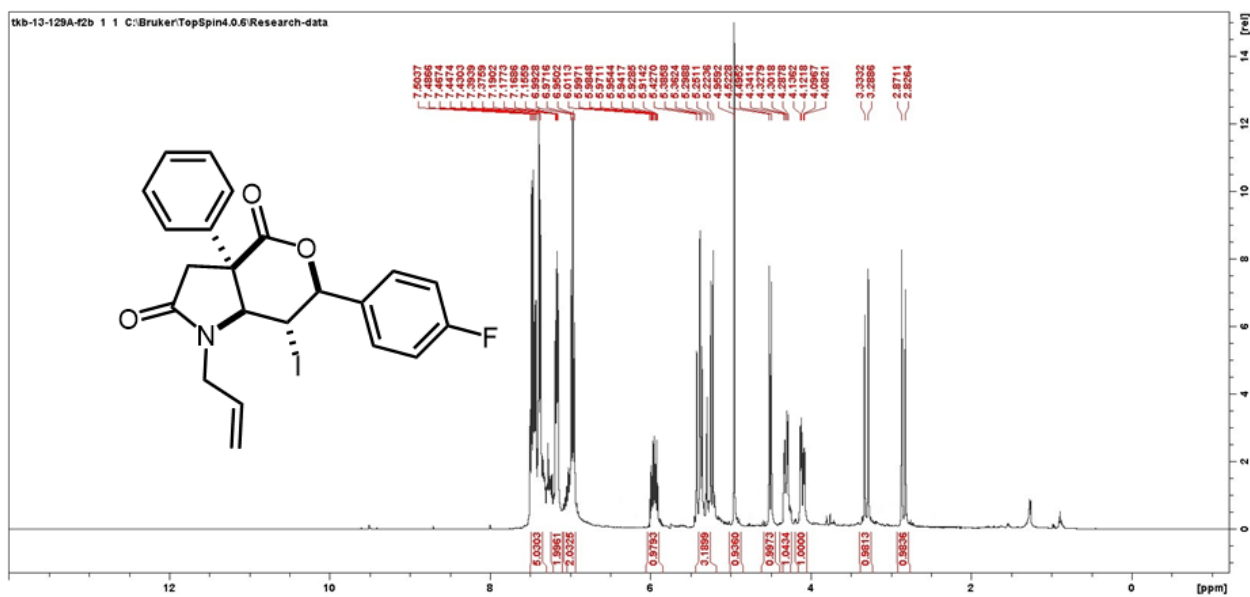

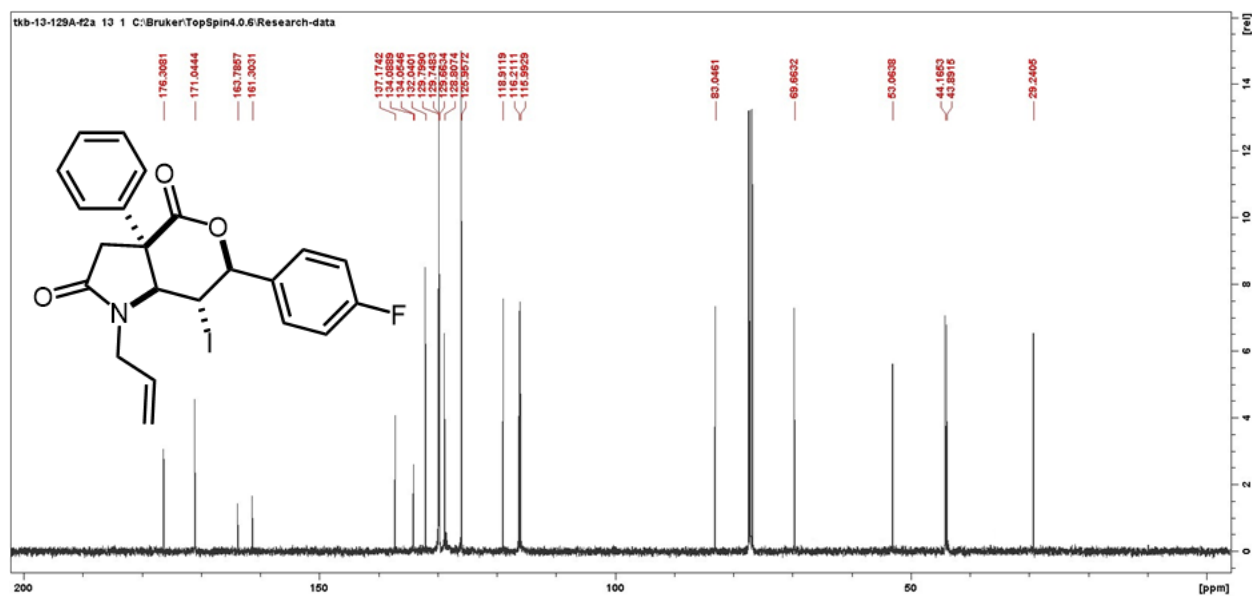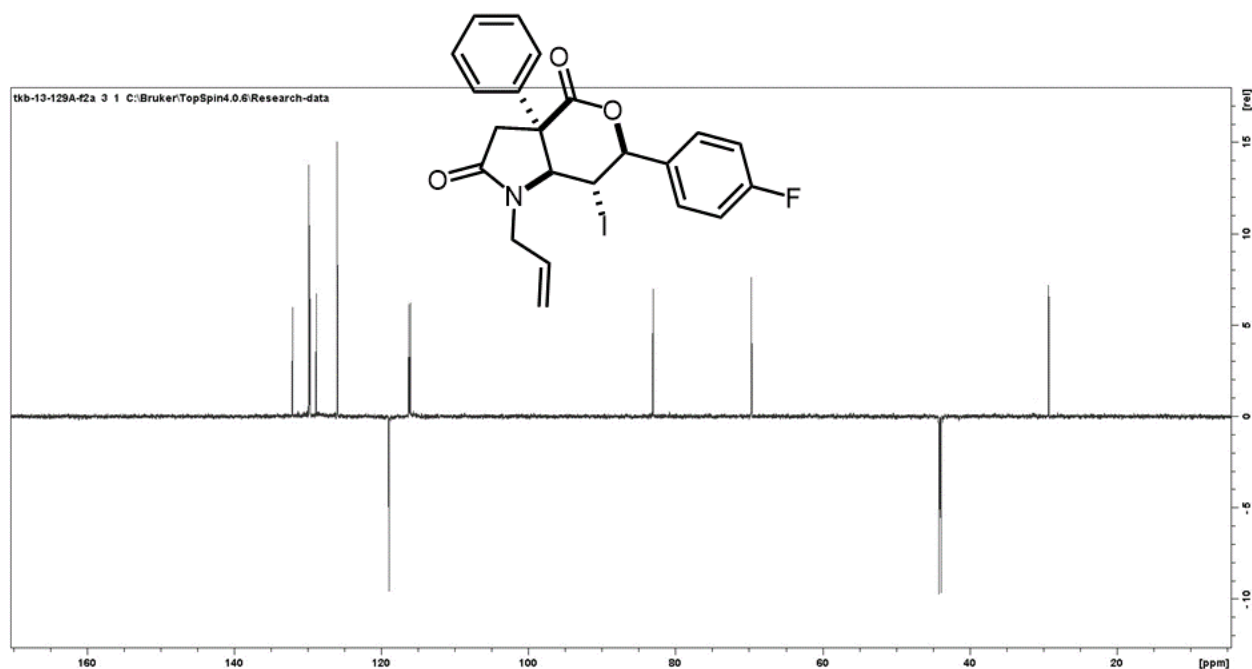

### Compound 4y

Prepared in 1 mmol scale using **General Procedure B**. Purification: Flash chromatography on silica eluting with hexane/EtOAc (80:20). Oily substance. Yield = 427.5 mg, 90%, 74:26 dr (*anti:syn*).  $^1\text{H}$  NMR (400 MHz,  $\text{CDCl}_3$ )  $\delta$  7.49 – 7.19 (m, 10H), 5.32 + 5.17 (d,  $J = 10.6$  Hz, 1H), 4.99 + 4.91 (s, 1H), 4.55 + 4.29 (d,  $J = 10.6$  Hz, 1H), 4.19 + 3.88 (p,  $J = 7.0$  Hz, 1H), 3.55 + 3.23 (d,  $J = 17.7$  Hz, 1H), 2.78 + 2.59 (d,  $J = 17.7$  Hz, 1H), 1.59 – 1.32 (m, 6H).  $^{13}\text{C}$  NMR (101 MHz,

$\text{CDCl}_3$ )  $\delta$  176.3, 172.1, 171.3, 170.9, 138.0, 138.0, 137.5, 136.3, 130.0, 129.8, 129.7, 129.1, 129.0, 128.8, 128.7, 128.6, 128.0, 127.9, 126.3, 125.9, 84.3, 82.0, 71.1, 69.4, 54.4, 53.1, 48.4, 46.6, 44.8, 43.9, 29.9, 29.3, 20.91, 20.4, 20.2, 18.0. FTIR (KBr): 2986.1, 2927.2, 1721.8, 1650.2, 1492.0, 1438.5, 1362.3, 1320.5, 1290.1, 1206.3, 1180.3, 1146.7, 1132.4, 985.8, 914.9, 703.1. HRMS calc for  $\text{C}_{22}\text{H}_{22}\text{INO}_3$  475.0644, found 475.0648.

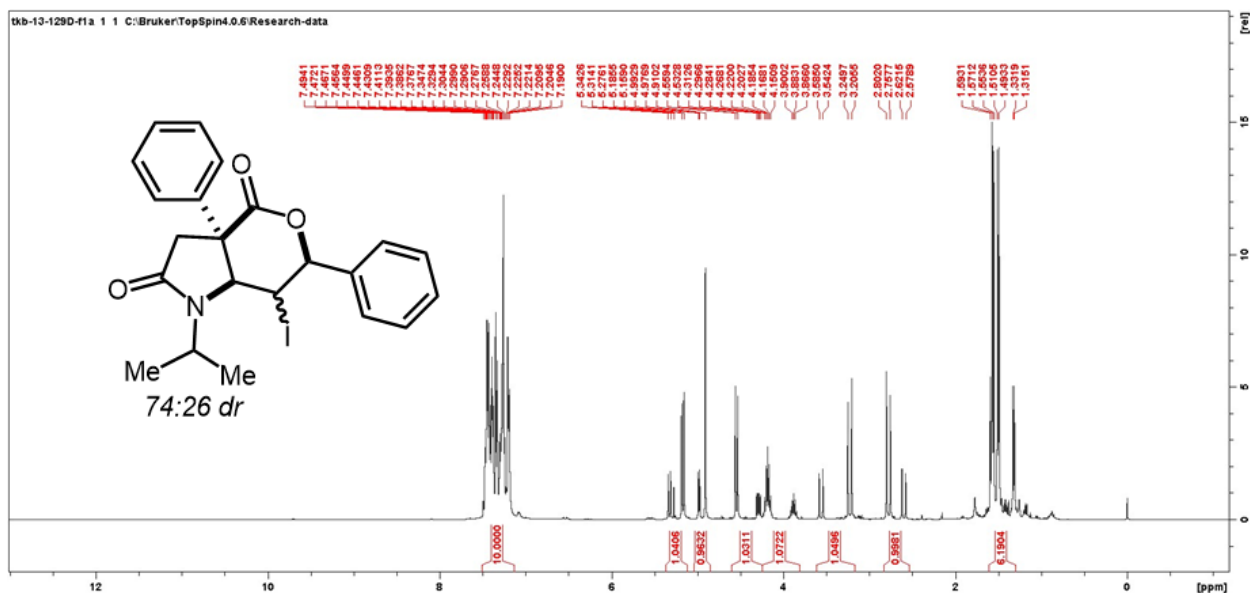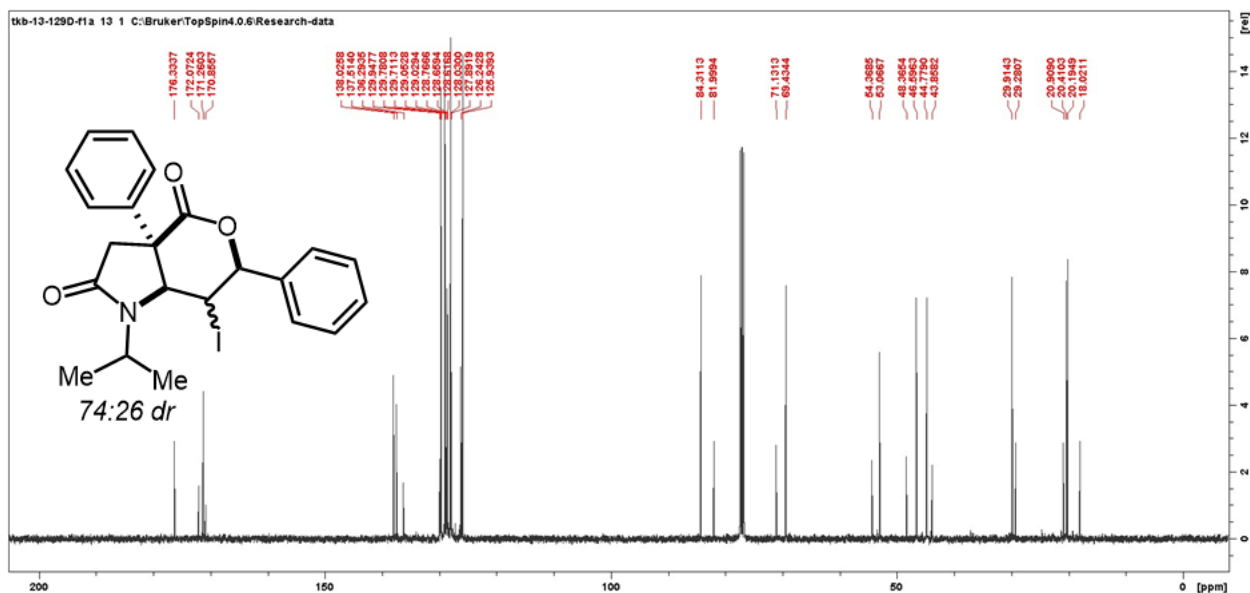

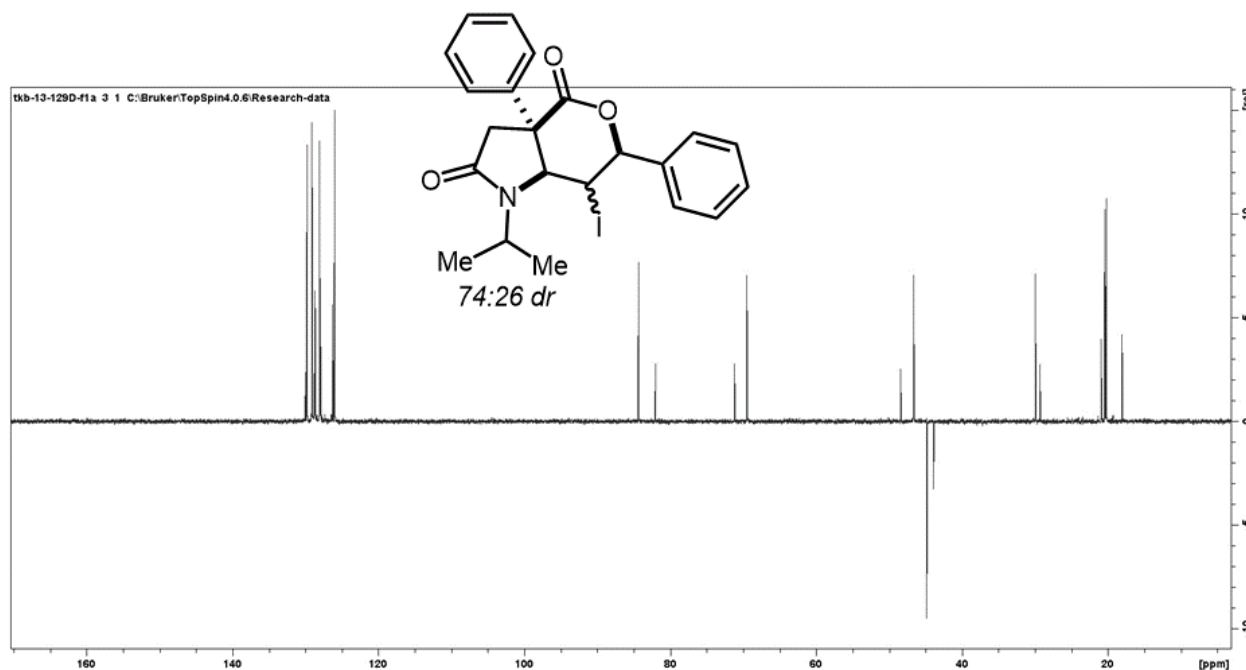

### Compound 4z

Prepared in 1 mmol scale using **General Procedure B**. Purification: Flash chromatography on silica eluting with hexane/EtOAc (80:20). Oily substance. Yield = 608.6 mg, 96%, 95:5 dr.

$^1\text{H}$  NMR (400 MHz,  $\text{CDCl}_3$ )  $\delta$  7.76 (d,  $J = 7.8$  Hz, 2H), 7.38 – 7.31 (m, 7H), 7.17 (q,  $J = 9.3$ , 8.3 Hz, 2H), 7.03 – 6.97 (m, 4H), 6.79 (d,  $J = 8.0$  Hz, 2H), 6.43 (d,  $J = 7.8$  Hz, 2H), 5.25 (d,  $J = 14.6$  Hz, 1H), 5.00 (d,  $J = 9.8$  Hz, 1H), 4.42 (d,  $J = 14.6$  Hz, 1H), 4.34 (d,  $J = 9.7$  Hz, 1H), 3.16 – 3.00 (m, 2H).  $^{13}\text{C}$  NMR (101 MHz,  $\text{CDCl}_3$ )  $\delta$  171.7, 171.2, 141.5, 139.6, 138.7, 133.7, 132.9, 130.1, 129.2, 129.1, 129.0, 128.7, 128.5, 128.3, 128.1, 128.1, 127.0, 126.2, 87.7, 67.8, 52.2, 45.8, 40.5, 31.9. FTIR (KBr): 3002.5, 2958.9, 1764.3, 1707.5, 1678.7, 1601.0, 1539.9, 1511.3, 1464.4, 1435.3, 1414.9, 1369.5, 1286.5, 1268.5, 1246.0, 1197.2, 1154.7, 1121.6, 1035.6, 977.8, 908.1. HRMS calc for  $\text{C}_{32}\text{H}_{25}\text{ClINO}_3$  633.0568, found 633.0562.

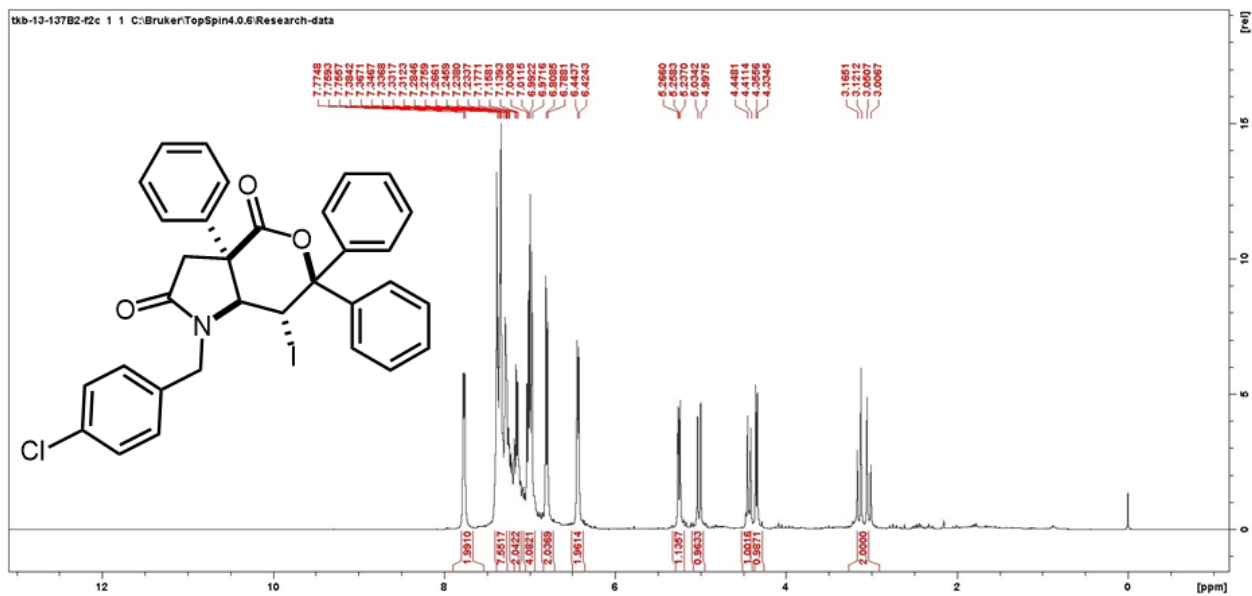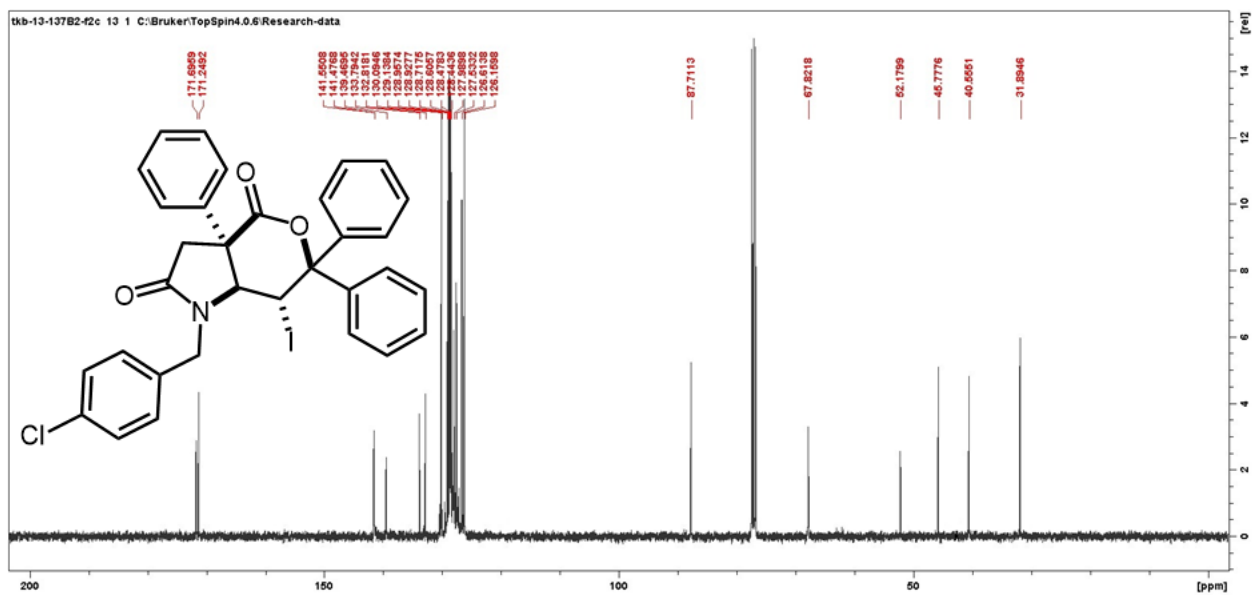

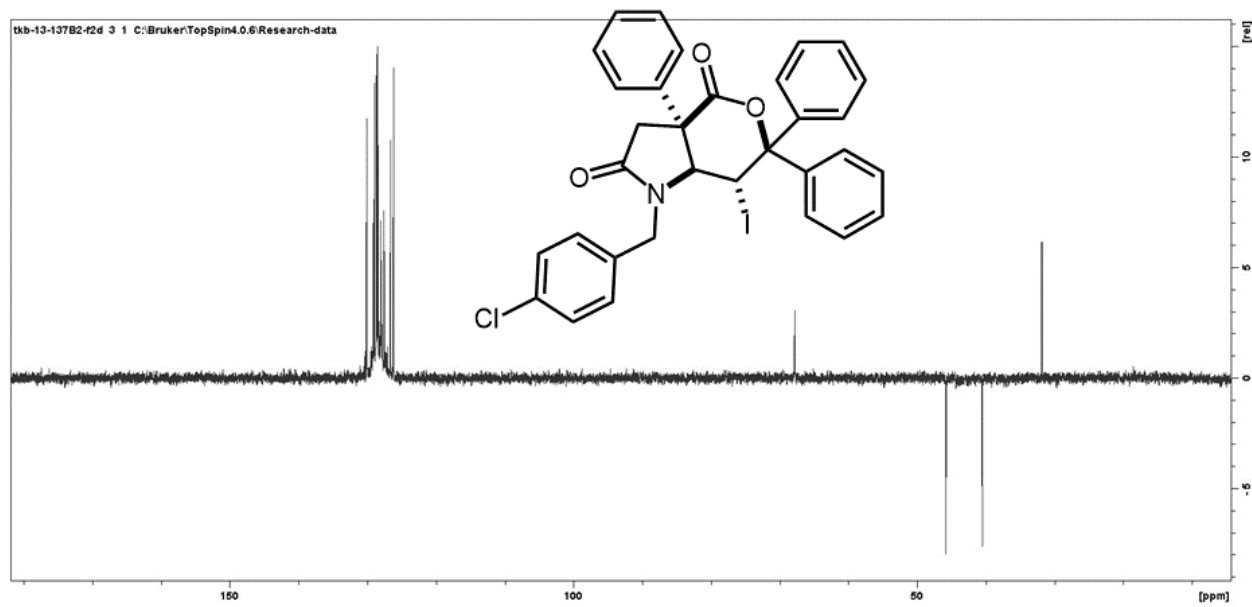

## References

- (1) H. Braunstein, S. Langevin, M. Khim, J. Adamson, K. Hovenkotter, L. Kotlarz, B. Mansker and T. K. Beng, *Org. Biomol. Chem.*, 2016, **14**, 8864-8872.
- (2) T. K. Beng, J. Fessenden, K. Quigley, J. Eichwald, and J. Zesiger, *New J. Chem.*, under review.
